# Supplementary material
Source: publisher site journal article supplement (https://www.spandidos-publications.com/1488/downloadSupplementary)
Supplement: Supplementary file 1 [file downloadSupplementary]

## Sheet: Normalized abundance
Tabe SII. List of proteins analyzed by PCA. The total protein abundance variation was explained via five principal components.
Protein IDs	Majority protein IDs	Protein names	Gene names	LFQ intensity u87mg1	LFQ intensity u87mg2	LFQ intensity u87mg3	LFQ intensity t98g1	LFQ intensity t98g2	LFQ intensity t98g3
F5GXJ9;Q13740-2;Q13740;H7C543;Q13740-4;Q13740-3	F5GXJ9;Q13740-2;Q13740;H7C543;Q13740-4	CD166 antigen	ALCAM	1.06357e+07	1.03417e+07	9.32094e+06	7.32923e+06	6.89203e+06	7.76601e+06
H0Y2W2;Q9NVI7-2;Q9NVI7;Q9NVI7-3;Q5T2N8;Q5T9A4-3;Q5T9A4;J3QSF3;Q5T9A4-2	H0Y2W2;Q9NVI7-2;Q9NVI7;Q9NVI7-3;Q5T2N8;Q5T9A4-3;Q5T9A4	ATPase family AAA domain-containing protein 3A;ATPase family AAA domain-containing protein 3C;ATPase family AAA domain-containing protein 3B	ATAD3A;ATAD3C;ATAD3B	1.13293e+07	1.07546e+07	6.89776e+06	7.21956e+06	8.4702e+06	7.88624e+06
P43155-2;P43155;H0Y4Z7;P43155-3	P43155-2;P43155;H0Y4Z7;P43155-3	Carnitine O-acetyltransferase	CRAT	6.19498e+06	6.30276e+06	6.49079e+06	8.24165e+06	7.05154e+06	2.29053e+06
Q16698-2;Q16698;E5RJD2;E5RJG7;E5RFV2;E5RID6	Q16698-2;Q16698;E5RJD2;E5RJG7;E5RFV2	2,4-dienoyl-CoA reductase, mitochondrial	DECR1	1.08884e+07	1.38182e+07	1.30084e+07	1.52111e+07	1.26058e+07	1.45702e+07
H0Y7V4;A0A075B6F3;Q96JB1-2;Q96JB1	H0Y7V4;A0A075B6F3;Q96JB1-2;Q96JB1	Dynein heavy chain 8, axonemal	DNAH8	4.86755e+07	4.42835e+07	4.70384e+07	3.64348e+07	3.77781e+07	3.65157e+07
Q13541	Q13541	Eukaryotic translation initiation factor 4E-binding protein 1	EIF4EBP1	2.0325e+07	2.06377e+07	2.17211e+07	2.02705e+07	2.01138e+07	1.83364e+07
O00425;O00425-2	O00425	Insulin-like growth factor 2 mRNA-binding protein 3	IGF2BP3	9.66873e+06	1.11933e+07	8.39081e+06	5.14517e+06	5.88083e+06	5.63744e+06
H3BNK3;O14561	H3BNK3;O14561	Acyl carrier protein;Acyl carrier protein, mitochondrial	NDUFAB1	1.49337e+07	1.47783e+07	1.47283e+07	2.33014e+07	1.94368e+07	2.06465e+07
P45877	P45877	Peptidyl-prolyl cis-trans isomerase C	PPIC	6.35046e+06	4.4544e+06	6.69006e+06	8.90978e+06	6.34873e+06	8.0656e+06
Q96AT9;C9J9T0;C9IZU8;Q96AT9-4;Q96AT9-2;C9J6A7;Q96AT9-5;Q96AT9-3;F8WBT4;C9IYE8;E7ESZ6;C9J8S0;Q2QD12	Q96AT9;C9J9T0;C9IZU8;Q96AT9-4;Q96AT9-2;C9J6A7;Q96AT9-5;Q96AT9-3	Ribulose-phosphate 3-epimerase	RPE	8.79806e+06	9.29341e+06	7.12977e+06	1.23276e+07	1.04664e+07	1.14665e+07
P62273;P62273-2;A0A087WTT6	P62273;P62273-2;A0A087WTT6	40S ribosomal protein S29	RPS29	1.27651e+07	1.37438e+07	1.40183e+07	8.16167e+06	1.39329e+07	1.6356e+07
P23921;E9PL69	P23921;E9PL69	Ribonucleoside-diphosphate reductase large subunit	RRM1	1.11257e+07	1.09044e+07	5.79887e+06	4.4635e+06	5.27307e+06	4.63947e+06
Q15459;Q15459-2;F8WB66;F8WC79;H7C1L2	Q15459;Q15459-2	Splicing factor 3A subunit 1	SF3A1	1.64056e+07	1.52146e+07	1.38602e+07	1.41285e+07	1.38695e+07	1.67523e+07
J3QLE5;P14678-2;P63162;P14678;P63162-2;P14678-3;J3KRY3;S4R3P3	J3QLE5;P14678-2;P63162;P14678;P63162-2;P14678-3;J3KRY3;S4R3P3	Small nuclear ribonucleoprotein-associated proteins B and B;Small nuclear ribonucleoprotein-associated protein N	SNRPN;SNRPB	5.96925e+06	6.58992e+06	6.69215e+06	6.40017e+06	4.37975e+06	5.39948e+06
H0YK42;Q13596-2;Q13596;Q13596-3	H0YK42;Q13596-2;Q13596;Q13596-3	Sorting nexin-1	SNX1	8.98475e+06	1.06947e+07	7.6115e+06	7.89929e+06	8.49452e+06	8.94431e+06
Q13242;H0YIB4;S4R3G0	Q13242;H0YIB4	Serine/arginine-rich splicing factor 9	SRSF9	1.20879e+07	1.21928e+07	1.13442e+07	1.05617e+07	1.06762e+07	9.81289e+06
Q15836;K7ENK9;K7EKX0;J3QRU4;F8WCA0;L7N2F9;P63027	Q15836;K7ENK9;K7EKX0;J3QRU4;F8WCA0;L7N2F9;P63027	Vesicle-associated membrane protein 3;Vesicle-associated membrane protein 2	VAMP3;VAMP2	7.69202e+06	8.75675e+06	8.14405e+06	3.9677e+06	4.87349e+06	4.25808e+06
P84085;C9J1Z8;F5H1V1;F5H6T5;F8WDB3	P84085;C9J1Z8	ADP-ribosylation factor 5	ARF5	7.17082e+06	7.40206e+06	6.27598e+06	5.95502e+06	6.02173e+06	6.20656e+06
Q13561;Q13561-3;Q13561-2;F8W1I6;H0YI98;F8VW18;H0YHL1;F8VX93;F8VRV7	Q13561;Q13561-3;Q13561-2;F8W1I6;H0YI98;F8VW18	Dynactin subunit 2	DCTN2	1.03862e+07	1.43997e+07	1.36778e+07	1.28764e+07	1.34944e+07	1.56634e+07
H9KV28;A0A140T8Z0;A0A0G2JH68;O60610-2;O60610-3;O60610	H9KV28;A0A140T8Z0;A0A0G2JH68;O60610-2;O60610-3;O60610	Protein diaphanous homolog 1	DIAPH1	1.10058e+07	1.08536e+07	5.9654e+06	6.97921e+06	7.22949e+06	7.25434e+06
H3BRL8;H3BPZ1;H3BS72;Q9P035-2;Q9P035;H3BMZ1	H3BRL8;H3BPZ1;H3BS72;Q9P035-2;Q9P035;H3BMZ1	Very-long-chain (3R)-3-hydroxyacyl-CoA dehydratase 3	HACD3	6.09079e+06	7.03256e+06	6.92034e+06	5.32364e+06	4.63891e+06	5.60196e+06
A0A1W2PNM1;A0A0A0MSE2;A0A0D9SFP2;E9PF18;Q16836;Q16836-3;Q16836-2;A0A1W2PQ78;A0A1W2PQC2;A0A1W2PRT2;A0A1W2PQV5	A0A1W2PNM1;A0A0A0MSE2;A0A0D9SFP2;E9PF18;Q16836;Q16836-3;Q16836-2;A0A1W2PQ78	Hydroxyacyl-coenzyme A dehydrogenase, mitochondrial	HADH	1.38529e+07	1.43412e+07	1.56995e+07	2.00166e+07	2.12964e+07	2.138e+07
Q7Z4V5-2;Q7Z4V5;M0R0J3;A0A024R216;Q9Y3E1;Q7Z4V5-4;Q7Z4V5-3;A0A087WX58;K7EPS6	Q7Z4V5-2;Q7Z4V5;M0R0J3;A0A024R216;Q9Y3E1;Q7Z4V5-4;Q7Z4V5-3	Hepatoma-derived growth factor-related protein 2;Hepatoma-derived growth factor-related protein 3	HDGFRP2;HDGFRP3	8.76357e+06	9.85732e+06	6.22422e+06	3.60409e+06	3.51483e+06	3.71405e+06
A0A0M3HER1;P48059;P48059-4;P48059-2;P48059-5;P48059-3;A0A0J9YXC7;Q7Z4I7-4;Q7Z4I7-3;Q7Z4I7;Q7Z4I7-5;Q7Z4I7-2;H0Y592	A0A0M3HER1;P48059;P48059-4;P48059-2;P48059-5;P48059-3;A0A0J9YXC7;Q7Z4I7-4;Q7Z4I7-3;Q7Z4I7;Q7Z4I7-5;Q7Z4I7-2	LIM and senescent cell antigen-like-containing domain protein 1;LIM and senescent cell antigen-like-containing domain protein 2	LIMS1;LIMS2	1.05672e+07	9.95431e+06	7.92654e+06	5.62162e+06	4.57624e+06	5.17307e+06
O00487;C9JW37	O00487	26S proteasome non-ATPase regulatory subunit 14	PSMD14	1.87767e+07	1.42263e+07	1.42187e+07	1.40729e+07	1.37885e+07	1.54722e+07
P47914	P47914	60S ribosomal protein L29	RPL29	2.62928e+07	2.05649e+07	1.68588e+07	1.63205e+07	1.58196e+07	1.67337e+07
Q13501-2;Q13501;E7EMC7;E9PFW8;C9JRJ8;E3W990	Q13501-2;Q13501;E7EMC7;E9PFW8	Sequestosome-1	SQSTM1	5.99634e+07	4.06868e+07	4.79916e+07	4.59408e+07	4.59185e+07	4.344e+07
D6RFM0;D6RAH7;H9KV45;A0A0A0MQU3;A0A087WY85;P62837-2;P62837;P61077;P61077-2;P61077-3;D6RAW0	D6RFM0;D6RAH7;H9KV45;A0A0A0MQU3;A0A087WY85;P62837-2;P62837;P61077;P61077-2;P61077-3;D6RAW0	Ubiquitin-conjugating enzyme E2 D2;Ubiquitin-conjugating enzyme E2 D3	UBE2D2;UBE2D3	1.66413e+07	1.66587e+07	1.50608e+07	1.42465e+07	1.50839e+07	1.54469e+07
O43237;O43237-2;J3KRI4;J3KRZ2;B4E2E0;J3KSD2;C9JGM7;C9JLW1	O43237;O43237-2;J3KRI4	Cytoplasmic dynein 1 light intermediate chain 2	DYNC1LI2	1.0135e+07	1.15608e+07	1.01611e+07	9.81726e+06	9.54343e+06	8.78357e+06
P14550;Q5T621;V9GYG2;V9GYP9	P14550	Alcohol dehydrogenase [NADP(+)]	AKR1A1	5.49893e+07	4.04364e+07	4.79717e+07	9.13378e+07	8.44366e+07	8.14009e+07
P52895;B4DK69;S4R3P0;P52895-2	P52895;B4DK69;S4R3P0	Aldo-keto reductase family 1 member C2	AKR1C2	3.62881e+07	3.92035e+07	3.96417e+07	3.77928e+08	3.80868e+08	3.9917e+08
P50995-2;P50995;H0Y6E1	P50995-2;P50995	Annexin A11	ANXA11	2.25368e+07	2.14807e+07	2.49782e+07	2.32637e+07	2.57866e+07	2.41235e+07
G3V1C3;Q9BZZ5-3;Q9BZZ5-2;Q9BZZ5;Q9BZZ5-5;E9PQK6;Q9BZZ5-1;Q9BZZ5-6	G3V1C3;Q9BZZ5-3;Q9BZZ5-2;Q9BZZ5;Q9BZZ5-5;E9PQK6;Q9BZZ5-1;Q9BZZ5-6	Apoptosis inhibitor 5	API5	5.5612e+06	5.86693e+06	6.7508e+06	6.83904e+06	6.88459e+06	6.53541e+06
P48047;H7C0C1;H7C086;H7C068	P48047;H7C0C1;H7C086	ATP synthase subunit O, mitochondrial	ATP5O	1.2363e+07	1.53054e+07	1.10419e+07	1.07168e+07	1.47255e+07	1.17233e+07
P38606-2;P38606;C9JA17;C9JVW8	P38606-2;P38606	V-type proton ATPase catalytic subunit A	ATP6V1A	1.96331e+07	1.89839e+07	1.9952e+07	1.16614e+07	1.61421e+07	1.373e+07
P21281;H0YC04;C9J5E3;C9JNS9;C9JL73;P15313	P21281;H0YC04	V-type proton ATPase subunit B, brain isoform	ATP6V1B2	1.66368e+07	1.77387e+07	1.65852e+07	1.40251e+07	1.53285e+07	1.46857e+07
O75348;F2Z307;O95670-2;O95670	O75348	V-type proton ATPase subunit G 1	ATP6V1G1	6.53452e+06	5.42294e+06	6.54184e+06	6.29478e+06	5.24271e+06	4.50312e+06
Q9H3K6;A0A087WZT3;Q9H3K6-2;H3BV85;H3BTW0;A0A0B4J295;H3BVE0	Q9H3K6;A0A087WZT3;Q9H3K6-2	BolA-like protein 2	BOLA2	1.25536e+07	1.65082e+07	1.09263e+07	8.25298e+06	6.5543e+06	9.45786e+06
B4DKY1;P49589-2;P49589;P49589-3;C9JLN0;E9PRS8;E9PLP0	B4DKY1;P49589-2;P49589;P49589-3	Cysteine--tRNA ligase, cytoplasmic	CARS	1.08161e+07	1.38286e+07	1.3103e+07	1.61012e+07	1.21793e+07	1.29668e+07
P04040	P04040	Catalase	CAT	9.78972e+06	1.5092e+07	1.16329e+07	1.99961e+07	1.90764e+07	2.30999e+07
E7EU96;Q8NEV1;P68400;P68400-2;V9GYA2;V9GY80;A0A087WY74	E7EU96;Q8NEV1;P68400;P68400-2	Casein kinase II subunit alpha 3;Casein kinase II subunit alpha	CSNK2A1;CSNK2A3	1.41538e+07	1.38124e+07	1.45489e+07	1.87617e+07	1.7951e+07	2.19982e+07
P35221;P35221-2;G3XAM7;P35221-3;E5RIB1;E5RG03;E5RJ41;E5RHV7;E5RGY6;E5RFM3;E5RJL0;E5RFK9;E5RFM5;E5RIE0;E5RJP7;E5RGD2;E5RGY7;E5RJZ2;E5RGG4;E5RJ43;E5RGS1;E5RIT8;A0A087WZL6;E5RGU3;E5RHJ5;E5RFG3;H0YBB8;Q9UI47	P35221;P35221-2;G3XAM7;P35221-3	Catenin alpha-1	CTNNA1	1.68316e+07	1.67988e+07	1.53611e+07	5.81225e+07	4.68155e+07	3.80309e+07
E7ETB3;Q9ULA0;E7EMB6;F8WAN0;B9ZVU2;C9JBE1;C9J1E2;E7EPX3;E5RJ35;C9JRG3	E7ETB3;Q9ULA0;E7EMB6;F8WAN0;B9ZVU2;C9JBE1	Aspartyl aminopeptidase	DNPEP	1.03513e+07	9.83272e+06	9.64573e+06	8.0162e+06	7.97202e+06	6.84726e+06
G3V1D3;G3V180;Q9NY33;Q9NY33-4;Q9NY33-2;E9PQ14;E9PPK9;E9PKK8;E9PQF2;E9PNX5	G3V1D3;G3V180;Q9NY33;Q9NY33-4;Q9NY33-2	Dipeptidyl peptidase 3	DPP3	1.14081e+07	1.19355e+07	1.19584e+07	1.02026e+07	9.76774e+06	1.06874e+07
A0A087WZK9;B3KS98;O15372;E5RJT0;E5RGU4;E5RHC7;E5RH59;E5RFW7;E5RFH0	A0A087WZK9;B3KS98;O15372;E5RJT0	Eukaryotic translation initiation factor 3 subunit H	EIF3H	5.97535e+07	5.68123e+07	5.98566e+07	4.6659e+07	3.62087e+07	4.86808e+07
Q15717;Q15717-2;M0QZR9;M0R055	Q15717;Q15717-2;M0QZR9	ELAV-like protein 1	ELAVL1	1.3507e+07	1.25131e+07	1.27571e+07	1.96911e+07	1.91879e+07	1.92384e+07
P07099;B1AQP9;B1AQP8	P07099	Epoxide hydrolase 1	EPHX1	2.45579e+07	2.3942e+07	2.52464e+07	6.7356e+08	7.08541e+08	7.34449e+08
P38117;P38117-2;M0QY67	P38117;P38117-2;M0QY67	Electron transfer flavoprotein subunit beta	ETFB	1.53341e+07	1.39317e+07	1.4415e+07	1.98737e+07	1.94719e+07	2.08225e+07
Q9NSD9;Q9NSD9-2	Q9NSD9;Q9NSD9-2	Phenylalanine--tRNA ligase beta subunit	FARSB	1.42871e+07	1.37581e+07	1.28748e+07	1.61287e+07	1.20183e+07	1.55462e+07
P22087;M0R299;M0QXL5;M0R2Q4;M0R0P1;M0R2U2;M0R1H0;M0R2B0;A6NHQ2	P22087;M0R299;M0QXL5;M0R2Q4;M0R0P1	rRNA 2-O-methyltransferase fibrillarin	FBL	1.0355e+07	1.48659e+07	1.25382e+07	1.78018e+07	1.84353e+07	1.82371e+07
P39748;P39748-2;I3L3E9;F5H1Y3	P39748;P39748-2;I3L3E9	Flap endonuclease 1	FEN1	2.32433e+07	2.56094e+07	2.28274e+07	2.15468e+07	2.31331e+07	2.39806e+07
P02792	P02792	Ferritin light chain	FTL	5.60638e+07	5.71364e+07	5.92476e+07	2.93642e+08	3.12372e+08	2.77904e+08
Q04760-2;Q04760	Q04760-2;Q04760	Lactoylglutathione lyase	GLO1	1.88815e+07	1.78261e+07	1.68763e+07	4.47819e+07	5.80512e+07	6.3696e+07
P17174;P17174-2	P17174;P17174-2	Aspartate aminotransferase, cytoplasmic	GOT1	2.03459e+07	2.00512e+07	2.14944e+07	2.23272e+07	2.00408e+07	2.56012e+07
U3KQ56;Q9UBQ7	U3KQ56;Q9UBQ7	Glyoxylate reductase/hydroxypyruvate reductase	GRHPR	1.0552e+07	1.04829e+07	6.7482e+06	1.21103e+07	1.5599e+07	1.76016e+07
P00390-2;P00390;P00390-4;P00390-3;P00390-5;E5RI06;H0YC68	P00390-2;P00390;P00390-4;P00390-3;P00390-5	Glutathione reductase, mitochondrial	GSR	2.34097e+07	2.18237e+07	2.39725e+07	5.90549e+07	5.00576e+07	8.84043e+07
P78347-2;P78347-4;P78347-3;P78347;P78347-5	P78347-2;P78347-4;P78347-3;P78347	General transcription factor II-I	GTF2I	1.67016e+07	1.46204e+07	1.47862e+07	2.78238e+07	4.43592e+07	2.18756e+07
P51659;E7EWE5;P51659-3;P51659-2;E7ER27;G5E9S2;E7ET17;E7EPL9	P51659;E7EWE5;P51659-3;P51659-2;E7ER27;G5E9S2;E7ET17;E7EPL9	Peroxisomal multifunctional enzyme type 2;(3R)-hydroxyacyl-CoA dehydrogenase;Enoyl-CoA hydratase 2	HSD17B4	1.99067e+07	1.93084e+07	1.9768e+07	5.65841e+07	5.60058e+07	1.07533e+08
Q32P28;Q32P28-4;Q32P28-3;Q32P28-2;E2QRI1;H7C2W6	Q32P28;Q32P28-4;Q32P28-3;Q32P28-2	Prolyl 3-hydroxylase 1	LEPRE1	9.88625e+06	9.94833e+06	8.8523e+06	5.18057e+07	1.05346e+08	1.04746e+08
P42704;B8ZZ38;A0A0C4DG06;C9JCA9	P42704;B8ZZ38;A0A0C4DG06	Leucine-rich PPR motif-containing protein, mitochondrial	LRPPRC	1.57927e+07	1.73336e+07	1.7002e+07	4.98133e+07	3.1103e+07	3.30718e+07
P28482;P28482-2	P28482;P28482-2	Mitogen-activated protein kinase 1	MAPK1	1.96845e+07	1.88948e+07	1.93008e+07	1.36926e+07	1.53677e+07	1.50465e+07
P56192;P56192-2;H0YHV5;H0YIP0;H0YIC2	P56192;P56192-2	Methionine--tRNA ligase, cytoplasmic	MARS	1.32849e+07	1.30901e+07	1.34169e+07	1.79925e+07	1.77197e+07	1.77526e+07
Q9UNZ2;Q9UNZ2-5;Q9UNZ2-4;F2Z2K0;Q9UNZ2-6;R4GNE6;G3V4V8;R4GMY2	Q9UNZ2;Q9UNZ2-5;Q9UNZ2-4;F2Z2K0;Q9UNZ2-6	NSFL1 cofactor p47	NSFL1C	7.56298e+06	8.8863e+06	8.65531e+06	1.35579e+07	1.60502e+07	1.31574e+07
C9JEJ2;P49585;C9J050;H7C1T3;H7BZN1;Q9Y5K3-2;Q9Y5K3-4;Q9Y5K3-3;Q9Y5K3;C9J2E1;C9JVS0;C9JPY0;F8WAZ5;F2Z2B1	C9JEJ2;P49585;C9J050;H7C1T3;H7BZN1	Choline-phosphate cytidylyltransferase A	PCYT1A	1.49316e+07	1.47841e+07	1.47184e+07	1.82078e+07	1.33058e+07	1.92931e+07
P08559-3;P08559;P08559-4;P08559-2;Q5JPU3;Q5JPU0;Q5JPU1;Q5JPU2;Q5JPT9;P29803	P08559-3;P08559;P08559-4;P08559-2	Pyruvate dehydrogenase E1 component subunit alpha, somatic form, mitochondrial	PDHA1	1.54683e+07	1.71159e+07	1.71459e+07	1.77395e+07	2.01089e+07	2.12634e+07
P32119;A6NIW5;P32119-2	P32119;A6NIW5	Peroxiredoxin-2	PRDX2	4.14267e+07	4.19204e+07	4.22597e+07	1.19114e+08	1.03312e+08	1.08385e+08
O75475;O75475-3;O75475-2	O75475;O75475-3;O75475-2	PC4 and SFRS1-interacting protein	PSIP1	8.0846e+06	1.29496e+07	1.12249e+07	8.41824e+06	9.00018e+06	1.01543e+07
P49720;A0A087WXQ8;A0A087WY10;A0A087WUL2	P49720;A0A087WXQ8;A0A087WY10;A0A087WUL2	Proteasome subunit beta type-3	PSMB3	7.70869e+06	8.48621e+06	7.80027e+06	1.53993e+07	1.2962e+07	1.45195e+07
R4GMR5;P48556;K7EJC1;K7EJR3;K7ERW6	R4GMR5;P48556;K7EJC1;K7EJR3	26S proteasome non-ATPase regulatory subunit 8	PSMD8	1.37598e+07	1.39149e+07	1.25131e+07	1.09545e+07	1.23993e+07	1.30601e+07
Q14914;Q14914-2;F2Z3J9;Q5JVP2;F6XGT7	Q14914;Q14914-2	Prostaglandin reductase 1	PTGR1	3.05247e+07	2.85334e+07	2.83099e+07	2.16967e+08	2.36566e+08	2.581e+08
P18031;B4DSN5	P18031;B4DSN5	Tyrosine-protein phosphatase non-receptor type 1;Tyrosine-protein phosphatase non-receptor type	PTPN1	3.64558e+07	3.24785e+07	4.17354e+07	4.76577e+07	2.5259e+07	1.7106e+07
P78406;E9PQ57;B0QZ36;E9PPG9	P78406;E9PQ57	mRNA export factor	RAE1	9.05594e+06	9.60608e+06	7.09315e+06	9.12491e+06	8.753e+06	9.28536e+06
Q16576;E9PC52;Q16576-2;Q5JP02;Q5JP01;Q5JNZ6;C9J7L0	Q16576;E9PC52;Q16576-2;Q5JP02	Histone-binding protein RBBP7	RBBP7	1.95493e+07	1.86865e+07	2.02039e+07	2.90041e+07	3.82293e+07	2.3636e+07
Q5T5C7;P49591	Q5T5C7;P49591	Serine--tRNA ligase, cytoplasmic	SARS	1.00178e+07	9.64764e+06	8.35348e+06	1.29346e+07	1.34669e+07	1.75317e+07
H0YF61;P22307-6;P22307-2;P22307-4;P22307-7;P22307-8;P22307	H0YF61;P22307-6;P22307-2;P22307-4;P22307-7;P22307-8;P22307	Non-specific lipid-transfer protein	SCP2	9.21621e+06	1.48389e+07	1.18189e+07	2.09041e+07	2.01998e+07	1.93246e+07
Q15393;Q15393-3	Q15393;Q15393-3	Splicing factor 3B subunit 3	SF3B3	7.71016e+06	8.48621e+06	7.80027e+06	8.37509e+06	1.01422e+07	8.54489e+06
Q15427;Q5SZ64	Q15427	Splicing factor 3B subunit 4	SF3B4	1.43456e+07	1.58382e+07	1.56778e+07	1.70295e+07	1.38871e+07	1.45479e+07
Q15758;M0QXM4;M0QX44;Q15758-3;Q15758-2;M0R144	Q15758;M0QXM4;M0QX44	Neutral amino acid transporter B(0);Amino acid transporter	SLC1A5	1.05187e+07	1.05671e+07	7.34665e+06	2.51357e+07	2.27242e+07	2.36664e+07
P12236;P12235;V9GYG0	P12236;P12235	ADP/ATP translocase 3;ADP/ATP translocase 3, N-terminally processed;ADP/ATP translocase 1	SLC25A6;SLC25A4	2.61335e+07	2.70428e+07	2.56609e+07	4.49421e+07	4.82259e+07	5.21389e+07
Q92504	Q92504	Zinc transporter SLC39A7	SLC39A7	9.83214e+06	9.95209e+06	7.04361e+06	2.08694e+08	1.43992e+08	6.89844e+07
P09486;F5H4E2	P09486	SPARC	SPARC	2.24907e+07	2.19889e+07	2.41678e+07	2.62007e+07	2.27893e+07	3.0463e+07
Q9NS69	Q9NS69	Mitochondrial import receptor subunit TOM22 homolog	TOMM22	8.74743e+06	1.06238e+07	7.55744e+06	1.41302e+07	1.38582e+07	1.64523e+07
O94826	O94826	Mitochondrial import receptor subunit TOM70	TOMM70A	1.21168e+07	1.13422e+07	7.01455e+06	1.06086e+07	1.13337e+07	9.75684e+06
Q8WZ42	REV__Q8WZ42-5;REV__Q8WZ42-2;REV__Q8WZ42;REV__Q8WZ42-8;REV__Q8WZ42-13;REV__Q8WZ42-12;REV__A0A0A0MTS7;REV__Q8WZ42-3;REV__Q8WZ42-10;REV__Q8WZ42-9;REV__A0A0A0MRA3;REV__Q8WZ42-11;REV__Q8WZ42-4;REV__Q8WZ42-7	Titin	TTN	7.60582e+07	7.44927e+07	7.77003e+07	4.77781e+07	4.79647e+07	5.76007e+07
F8W726;Q14157-4;Q14157-1;Q14157-3;Q14157;Q14157-5;Q5VU77;Q5VU79;Q5VU78;Q5VU81;Q5VU80;H0Y5H6;H7C2T8	F8W726;Q14157-4;Q14157-1;Q14157-3;Q14157;Q14157-5	Ubiquitin-associated protein 2-like	UBAP2L	1.51402e+07	1.41716e+07	1.44397e+07	1.36212e+07	1.93655e+07	1.76928e+07
O75947;O75947-2;F5H608	O75947;O75947-2;F5H608	ATP synthase subunit d, mitochondrial	ATP5H	9.89078e+07	1.02571e+08	1.07779e+08	1.31213e+08	4.09654e+07	9.78664e+07
P31040-2;P31040;A0A087X1I3;D6RFM5;P31040-3;H0Y8X1	P31040-2;P31040;A0A087X1I3;D6RFM5;P31040-3	Succinate dehydrogenase [ubiquinone] flavoprotein subunit, mitochondrial	SDHA	1.61214e+07	1.70031e+07	1.78699e+07	1.98166e+07	1.59624e+07	2.28242e+07
Q16186;A0A087WX59;A0A087WUX6	Q16186;A0A087WX59	Proteasomal ubiquitin receptor ADRM1	ADRM1	1.18266e+07	1.44727e+07	1.40323e+07	9.72139e+06	9.5662e+06	9.38936e+06
P20290-2;P20290	P20290-2;P20290	Transcription factor BTF3	BTF3	2.09225e+07	2.20546e+07	2.2994e+07	1.42206e+07	1.45159e+07	1.47395e+07
K7ENX8;K7ELV6;K7EJV5;K7ELT6;K7EJV1;K7EMY9;K7EPM4;K7ER40;K7EQR7;D6W5Y5;Q14011;Q14011-2	K7ENX8;K7ELV6;K7EJV5;K7ELT6;K7EJV1;K7EMY9;K7EPM4;K7ER40;K7EQR7;D6W5Y5;Q14011;Q14011-2	Cold-inducible RNA-binding protein	CIRBP	5.68972e+06	5.9776e+06	6.40602e+06	9.36373e+06	1.00933e+07	9.31492e+06
P36551;H0YA22;P36551-2	P36551;H0YA22	Oxygen-dependent coproporphyrinogen-III oxidase, mitochondrial	CPOX	5.24996e+06	7.41979e+06	8.44459e+06	4.88289e+06	5.09218e+06	4.54781e+06
Q06210-2;Q06210	Q06210-2;Q06210	Glutamine--fructose-6-phosphate aminotransferase [isomerizing] 1	GFPT1	1.16736e+07	1.25309e+07	1.20358e+07	1.17798e+07	1.01994e+07	9.236e+06
A0A0A0MRA5;B7Z4B8;Q9BUJ2-3;Q9BUJ2-4;Q9BUJ2-2;Q9BUJ2;M0QYZ0;M0R3F1;M0R0K8;M0R203;M0QZV6;M0QYM5;M0QYI8	A0A0A0MRA5;B7Z4B8;Q9BUJ2-3;Q9BUJ2-4;Q9BUJ2-2;Q9BUJ2;M0QYZ0;M0R3F1	Heterogeneous nuclear ribonucleoprotein U-like protein 1	HNRNPUL1	1.19629e+07	1.49465e+07	1.56592e+07	1.64482e+07	1.59986e+07	1.62171e+07
E9PKG6;V9HW75;A0A087WSV8;P80303-2;P80303;Q2L696;E9PLR0;E9PLE9;E9PJP3;H0YD18;E9PM22;H0YEG8	E9PKG6;V9HW75;A0A087WSV8;P80303-2;P80303;Q2L696;E9PLR0;E9PLE9	Nucleobindin-2;Nesfatin-1	NUCB2;HEL-S-109;Nucb2	1.29877e+07	1.1247e+07	1.13156e+07	1.14503e+07	1.05852e+07	1.22672e+07
O75340-2;O75340;A0A024QZ42;H0Y9X3;A0A087WZ38	O75340-2;O75340;A0A024QZ42	Programmed cell death protein 6	PDCD6	1.55418e+07	1.35163e+07	1.42771e+07	5.66453e+06	1.23001e+07	1.1087e+07
Q02809;Q02809-2;Q5JXB7;Q5JXB8	Q02809;Q02809-2	Procollagen-lysine,2-oxoglutarate 5-dioxygenase 1	PLOD1	2.52566e+07	2.80135e+07	2.40727e+07	2.05807e+07	2.02047e+07	1.90884e+07
Q9UMS4;F5GY56;H0YGZ5;H0YGF3	Q9UMS4	Pre-mRNA-processing factor 19	PRPF19	2.44206e+07	2.7088e+07	2.33557e+07	2.85047e+07	2.8752e+07	2.74286e+07
P28072;A0A087X2I4	P28072	Proteasome subunit beta type-6	PSMB6	1.56298e+07	1.67745e+07	2.44885e+07	9.18877e+06	9.26611e+06	9.32458e+06
P98179	P98179	RNA-binding protein 3	RBM3	3.42932e+07	2.07948e+07	2.1662e+07	3.97178e+07	3.76201e+07	4.01633e+07
P49207	P49207	60S ribosomal protein L34	RPL34	2.05183e+07	2.23297e+07	2.07835e+07	2.27587e+07	2.04486e+07	2.17822e+07
P62857	P62857	40S ribosomal protein S28	RPS28	3.46004e+07	2.77066e+07	2.71657e+07	2.79993e+07	2.95749e+07	3.1622e+07
O76094-2;O76094;D6RDY6	O76094-2;O76094;D6RDY6	Signal recognition particle subunit SRP72	SRP72	1.08685e+07	9.68492e+06	9.72369e+06	1.00047e+07	9.11138e+06	9.0858e+06
Q99805	Q99805	Transmembrane 9 superfamily member 2	TM9SF2	1.26904e+07	1.41989e+07	1.55584e+07	1.30539e+07	1.16821e+07	1.33428e+07
A0A0A6YYA0;Q86XR7-2;Q9Y3B3-2;Q9Y3B3;G3V2Y2	A0A0A6YYA0;Q86XR7-2;Q9Y3B3-2;Q9Y3B3	Transmembrane emp24 domain-containing protein 7	TMED7-TICAM2;TMED7	1.89288e+07	2.08652e+07	1.29883e+07	9.40486e+06	9.3057e+06	1.01336e+07
B1AH87;P30536	B1AH87;P30536	Translocator protein	TSPO	2.76084e+07	2.01661e+07	2.50875e+07	1.19522e+07	1.03456e+07	1.13629e+07
P61081;M0QYI6	P61081;M0QYI6	NEDD8-conjugating enzyme Ubc12	UBE2M	1.10404e+07	1.00344e+07	8.32126e+06	1.1597e+07	1.14081e+07	9.11468e+06
P27144;D3DQ64	P27144;D3DQ64	Adenylate kinase 4, mitochondrial	AK4	2.47938e+07	3.55631e+07	2.93783e+07	1.43322e+07	1.70136e+07	1.76907e+07
Q7L1Q6;Q7L1Q6-4;Q7L1Q6-3;Q7L1Q6-2;C9IZ80;C9JFN4;H0Y503;C9J188;C9JWF5;C9JV57	Q7L1Q6;Q7L1Q6-4;Q7L1Q6-3;Q7L1Q6-2;C9IZ80	Basic leucine zipper and W2 domain-containing protein 1	BZW1	2.899e+07	2.63569e+07	2.28126e+07	1.19318e+07	1.21057e+07	1.2446e+07
E7EW33;H7C229;E7EVJ5;Q96F07-2;Q96F07;Q7L576;Q7L576-3;Q7L576-2;H0YL50;A0A0G2JR96;A0A0G2JQT1	E7EW33;H7C229;E7EVJ5;Q96F07-2;Q96F07;Q7L576;Q7L576-3;Q7L576-2	Cytoplasmic FMR1-interacting protein 2;Cytoplasmic FMR1-interacting protein 1	CYFIP2;CYFIP1	4.08093e+07	3.37165e+07	4.48095e+07	2.89837e+07	3.20344e+07	3.00953e+07
E7EQR4;P15311	E7EQR4;P15311	Ezrin	EZR	2.51701e+07	2.12729e+07	2.47059e+07	1.60609e+07	1.58089e+07	1.62253e+07
Q14315;Q14315-2	Q14315;Q14315-2	Filamin-C	FLNC	1.01922e+09	9.50206e+08	1.15532e+09	1.12737e+07	1.08869e+07	9.71661e+06
Q02750;Q02750-2;H3BRW9;A0A1B0GUL7	Q02750;Q02750-2;H3BRW9	Dual specificity mitogen-activated protein kinase kinase 1	MAP2K1	3.84538e+07	3.19585e+07	5.08926e+07	1.03113e+07	1.12472e+07	1.15763e+07
A0A0R4J2G3;A0A0A0MTJ9;Q6PIU2;Q6PIU2-2;H7C046;Q6PIU2-3;F8WE33	A0A0R4J2G3;A0A0A0MTJ9;Q6PIU2;Q6PIU2-2;H7C046;Q6PIU2-3	Neutral cholesterol ester hydrolase 1	NCEH1	1.74726e+07	1.92471e+07	2.16108e+07	1.31972e+07	1.46585e+07	1.23232e+07
Q02218;A0A0D9SFS3;E9PCR7;E9PDF2;Q02218-2;E9PFG7;Q02218-3;C9J4G7;Q9ULD0;Q9ULD0-3;Q9ULD0-2	Q02218;A0A0D9SFS3;E9PCR7;E9PDF2;Q02218-2;E9PFG7	2-oxoglutarate dehydrogenase, mitochondrial	OGDH	2.38828e+07	3.20407e+07	2.30364e+07	1.7566e+07	1.81782e+07	1.82381e+07
O95747;C9JIG9	O95747	Serine/threonine-protein kinase OSR1	OXSR1	1.1704e+07	1.11061e+07	6.18465e+06	7.31116e+06	7.47099e+06	6.61861e+06
A0A1B0GTU4;P49023-2;P49023;P49023-3;F5GZ78;P49023-4;A0A1B0GU60;F5H836;A0A1B0GV30	A0A1B0GTU4;P49023-2;P49023;P49023-3;F5GZ78;P49023-4;A0A1B0GU60	Paxillin	PXN	5.49285e+07	5.75288e+07	5.87609e+07	1.52251e+07	1.37952e+07	1.45317e+07
P62854;Q5JNZ5	P62854;Q5JNZ5	40S ribosomal protein S26;Putative 40S ribosomal protein S26-like 1	RPS26;RPS26P11	3.2963e+07	3.82347e+07	3.60078e+07	3.43222e+07	3.39937e+07	3.37394e+07
O95197-3;B7Z4M1;O95197-6;O95197-5;O95197-4;O95197-7;O95197-2;O95197;F5H891;F5GWG7;F5H617	O95197-3;B7Z4M1;O95197-6;O95197-5;O95197-4;O95197-7;O95197-2;O95197	Reticulon-3;Reticulon	RTN3	1.45291e+07	1.4336e+07	1.43089e+07	1.11575e+07	1.28062e+07	1.15022e+07
Q9BVK6;F8W7F7	Q9BVK6	Transmembrane emp24 domain-containing protein 9	TMED9	2.2192e+07	2.10477e+07	2.24753e+07	1.73111e+07	1.92028e+07	1.97581e+07
Q6IBS0;D6RG15	Q6IBS0;D6RG15	Twinfilin-2	TWF2	1.4311e+07	1.40489e+07	1.67443e+07	1.06158e+07	1.08325e+07	9.90107e+06
A0A0A0MSS8;P42330;S4R3Z2;P42330-2;S4R3D5;P17516	A0A0A0MSS8;P42330;S4R3Z2;P42330-2	Aldo-keto reductase family 1 member C3	AKR1C3	2.66052e+07	2.41439e+07	2.14071e+07	2.75728e+08	3.38711e+08	3.26593e+08
P20073-2;P20073	P20073-2;P20073	Annexin A7	ANXA7	1.93239e+07	1.87581e+07	1.9814e+07	1.71876e+07	1.68607e+07	1.42307e+07
P54709;C9JA36;P54709-2;H7C547;F8WBY4;C9JXZ1;H7C4L9	P54709;C9JA36;P54709-2	Sodium/potassium-transporting ATPase subunit beta-3	ATP1B3	1.44871e+07	1.58101e+07	1.57642e+07	1.75957e+07	1.59469e+07	1.7634e+07
F8VPD4;P27708	F8VPD4;P27708	CAD protein;Glutamine-dependent carbamoyl-phosphate synthase;Aspartate carbamoyltransferase;Dihydroorotase	CAD	9.11401e+06	1.15507e+07	8.26968e+06	7.35238e+06	7.68715e+06	5.9798e+06
P62633-2;P62633;P62633-7;P62633-3;P62633-8;P62633-5;P62633-4;P62633-6	P62633-2;P62633;P62633-7;P62633-3;P62633-8;P62633-5;P62633-4;P62633-6	Cellular nucleic acid-binding protein	CNBP	9.28425e+06	1.48845e+07	1.19096e+07	9.43351e+06	1.48215e+07	1.43442e+07
Q8NBJ5;M0QX72	Q8NBJ5	Procollagen galactosyltransferase 1	COLGALT1	1.55753e+07	1.56818e+07	1.87384e+07	1.20083e+07	1.71333e+07	1.30864e+07
P13073;H3BN72;H3BNV9;Q86WV2;H3BPG0;H3BNI5	P13073;H3BN72;H3BNV9;Q86WV2;H3BPG0	Cytochrome c oxidase subunit 4 isoform 1, mitochondrial	COX4I1	1.13484e+07	8.02096e+06	1.08181e+07	1.24419e+07	1.50838e+07	1.54438e+07
P08574	P08574	Cytochrome c1, heme protein, mitochondrial	CYC1	1.25059e+07	1.2926e+07	1.29926e+07	1.41731e+07	1.65375e+07	1.46776e+07
F1T0B3;A0A087X2G1;Q92499;Q92499-3;Q92499-2	F1T0B3;A0A087X2G1;Q92499;Q92499-3;Q92499-2	ATP-dependent RNA helicase DDX1	DDX1	1.69768e+07	1.70477e+07	1.61185e+07	1.74886e+07	1.2392e+07	1.60084e+07
B0QYK0;Q01844-6;Q01844-3;Q01844;Q01844-5;A0A0D9SFL3;C9JGE3;Q01844-2;H7BY36;Q01844-4	B0QYK0;Q01844-6;Q01844-3;Q01844;Q01844-5;A0A0D9SFL3;C9JGE3;Q01844-2;H7BY36	RNA-binding protein EWS	EWSR1	8.34164e+06	1.15843e+07	8.22672e+06	1.49127e+07	1.5313e+07	1.3057e+07
P49915;P49915-2	P49915;P49915-2	GMP synthase [glutamine-hydrolyzing]	GMPS	2.39384e+07	3.01163e+07	3.54933e+07	8.183e+07	6.08245e+07	6.34659e+07
Q9H8Y8-2;Q9H8Y8;Q9H8Y8-3	Q9H8Y8-2;Q9H8Y8;Q9H8Y8-3	Golgi reassembly-stacking protein 2	GORASP2	7.08161e+06	7.37201e+06	6.0143e+06	7.74984e+06	6.56772e+06	6.99929e+06
Q9NRV9;F5GWX2;H0YG71	Q9NRV9;F5GWX2	Heme-binding protein 1	HEBP1	1.50815e+07	1.72374e+07	1.92847e+07	2.242e+07	2.154e+07	1.77749e+07
Q9P2J5-2;Q9P2J5;Q9P2J5-3;A0A087WXY1	Q9P2J5-2;Q9P2J5	Leucine--tRNA ligase, cytoplasmic	LARS	2.63997e+07	3.10049e+07	3.48442e+07	4.15011e+07	3.94104e+07	5.22646e+07
Q32MZ4-3;Q32MZ4-2;Q32MZ4;Q32MZ4-4;C9JSU1;Q9Y608-2;Q9Y608-4;Q9Y608-5;Q9Y608	Q32MZ4-3;Q32MZ4-2;Q32MZ4	Leucine-rich repeat flightless-interacting protein 1	LRRFIP1	9.66561e+06	1.03306e+07	5.94302e+06	1.85393e+07	1.14442e+07	9.82343e+06
P31153;P31153-2;Q00266	P31153;P31153-2	S-adenosylmethionine synthase isoform type-2	MAT2A	1.73814e+07	1.82943e+07	1.76915e+07	2.50163e+07	2.8372e+07	3.08836e+07
Q9NR45;Q5TBR0;Q5TBR1	Q9NR45;Q5TBR0	Sialic acid synthase	NANS	7.96195e+06	1.25254e+07	1.15002e+07	1.15859e+07	1.02739e+07	1.33763e+07
P49321;P49321-3;P49321-2;P49321-4;Q5T624;H0YDS9;E9PRH9;H0YF33;E9PI86;E9PPQ8;E9PPR5	P49321;P49321-3;P49321-2;P49321-4;Q5T624	Nuclear autoantigenic sperm protein	NASP	2.89353e+07	2.91161e+07	3.09917e+07	2.80829e+07	4.45523e+07	3.42779e+07
A0A0G2JN29;A0A087X117;Q15155;A0A0G2JP90;A0A087WW46;J3KN36;Q5JPE7-2;P69849;Q5JPE7;Q5JPE7-3;A0A087WTD5	A0A0G2JN29;A0A087X117;Q15155;A0A0G2JP90;A0A087WW46;J3KN36;Q5JPE7-2;P69849;Q5JPE7;Q5JPE7-3	Nodal modulator 1;Nodal modulator 2;Nodal modulator 3	NOMO1;NOMO3;NOMO2	1.11767e+07	1.31792e+07	1.12127e+07	1.07739e+07	1.20668e+07	1.17689e+07
O43809;H3BND3;H3BV41	O43809;H3BND3;H3BV41	Cleavage and polyadenylation specificity factor subunit 5	NUDT21	1.91037e+07	1.92097e+07	2.04959e+07	1.88535e+07	2.02545e+07	2.03279e+07
P43034;I3L3N5;I3L495;P43034-2	P43034;I3L3N5	Platelet-activating factor acetylhydrolase IB subunit alpha	PAFAH1B1	7.16422e+06	7.0094e+06	7.50862e+06	6.00598e+06	8.29488e+06	5.69957e+06
Q15102;M0R389;M0QZT2;M0R1K3;M0QXS6;M0R323	Q15102;M0R389;M0QZT2;M0R1K3	Platelet-activating factor acetylhydrolase IB subunit gamma	PAFAH1B3	1.56172e+07	1.60243e+07	1.83502e+07	2.90561e+07	3.75571e+07	2.67941e+07
P09874;Q5VX84;Q5VX85	P09874	Poly [ADP-ribose] polymerase 1	PARP1	1.13518e+07	1.91272e+07	2.30279e+07	2.40359e+07	2.44165e+07	2.43191e+07
P11177-2;P11177;P11177-3;C9J634;F8WF02	P11177-2;P11177;P11177-3;C9J634	Pyruvate dehydrogenase E1 component subunit beta, mitochondrial	PDHB	7.95032e+06	1.25773e+07	1.33628e+07	8.53648e+06	1.83465e+07	1.6582e+07
O15173;O15173-2;U3KQM0	O15173;O15173-2;U3KQM0	Membrane-associated progesterone receptor component 2	PGRMC2	9.95191e+06	6.06039e+06	9.68742e+06	6.00557e+06	8.32627e+06	1.04047e+07
J3QT77;A0A0J9YYG4;A0A0J9YXF2;Q15165-3;Q15165-1;Q15165;A0A0J9YXU7;G3XAK4;A0A0J9YYJ1	J3QT77;A0A0J9YYG4;A0A0J9YXF2;Q15165-3;Q15165-1;Q15165;A0A0J9YXU7;G3XAK4	Serum paraoxonase/arylesterase 2	PON2	1.33319e+07	1.30995e+07	1.3682e+07	1.89423e+07	1.67616e+07	1.61057e+07
P63151;P63151-2;Q00005-6;Q00005;Q00005-2;Q00005-3;Q66LE6;Q00005-4;Q00005-5;Q00005-7;A0A1W2PQI2;E5RIY1;E5RFR9;Q9Y2T4-3;Q9Y2T4-4;Q9Y2T4-2	P63151;P63151-2;Q00005-6;Q00005;Q00005-2;Q00005-3;Q66LE6;Q00005-4;Q00005-5;Q00005-7	Serine/threonine-protein phosphatase 2A 55 kDa regulatory subunit B alpha isoform;Serine/threonine-protein phosphatase 2A 55 kDa regulatory subunit B beta isoform;Serine/threonine-protein phosphatase 2A 55 kDa regulatory subunit B delta isoform	PPP2R2A;PPP2R2B;PPP2R2D	4.43881e+06	6.45556e+06	4.60844e+06	4.03799e+06	5.44921e+06	4.58471e+06
Q6P2Q9;I3L0J9;I3L3Z8	Q6P2Q9;I3L0J9	Pre-mRNA-processing-splicing factor 8	PRPF8	1.53352e+07	1.55076e+07	1.52996e+07	1.21215e+07	1.67451e+07	1.72925e+07
P07602;C9JIZ6;P07602-2;P07602-3;A0A0J9YXB8;Q5BJH1	P07602;C9JIZ6;P07602-2;P07602-3	Prosaposin;Saposin-A;Saposin-B-Val;Saposin-B;Saposin-C;Saposin-D	PSAP	1.59925e+07	1.67742e+07	2.00144e+07	1.65266e+07	1.91652e+07	1.8532e+07
P25788-2;P25788;G3V3W4;G3V5N4;G3V4X5	P25788-2;P25788	Proteasome subunit alpha type-3	PSMA3	1.24304e+07	1.18672e+07	1.19041e+07	8.51353e+06	1.11076e+07	1.21986e+07
C9JJ34;P43487-2;P43487;F6WQW2;C9JXG8;C9JDM3;C9JGV6;C9JIC6	C9JJ34;P43487-2;P43487;F6WQW2;C9JXG8;C9JDM3;C9JGV6	Ran-specific GTPase-activating protein	RANBP1	3.83658e+07	3.47278e+07	3.48367e+07	7.01502e+07	5.42103e+07	7.42263e+07
Q96PK6;Q96PK6-2;A0A0A6YYI9;F8WDX3;A0A0A0MSL8;B8ZZ74;Q96PK6-3;Q96PK6-4	Q96PK6	RNA-binding protein 14	RBM14	7.88501e+06	8.10386e+06	4.73202e+06	1.21889e+07	8.13846e+06	9.26803e+06
P46778;G3V1B3;M0R181	P46778;G3V1B3;M0R181	60S ribosomal protein L21	RPL21	3.24525e+07	2.83199e+07	2.64476e+07	3.22666e+07	3.28737e+07	3.10042e+07
H0YLP6;H0YMF4;H0YKD8;P46779-4;P46779-5;P46779;P46779-2;P46779-3	H0YLP6;H0YMF4;H0YKD8;P46779-4;P46779-5;P46779;P46779-2;P46779-3	60S ribosomal protein L28	RPL28	2.47609e+07	2.59705e+07	2.79687e+07	3.33071e+07	2.99693e+07	2.96461e+07
P42677;Q5T4L4;C9J1C5	P42677;Q5T4L4	40S ribosomal protein S27	RPS27	1.40542e+07	1.35334e+07	1.32779e+07	1.71111e+07	1.80295e+07	1.75682e+07
Q9Y3I0	Q9Y3I0	tRNA-splicing ligase RtcB homolog	RTCB	2.35254e+07	3.12836e+07	2.98111e+07	1.83741e+07	3.77946e+07	2.26053e+07
D6RD69;Q9Y6B6;D6R9R5;Q9H029;D6RDB2;X1WI22;D6RAA2	D6RD69;Q9Y6B6;D6R9R5;Q9H029;D6RDB2	GTP-binding protein SAR1b	SAR1B;DKFZp434B2017	2.62467e+07	2.4792e+07	2.23512e+07	1.46056e+07	1.81885e+07	1.61472e+07
O75533;H7C341	O75533	Splicing factor 3B subunit 1	SF3B1	9.11851e+06	1.15513e+07	8.47821e+06	6.16227e+07	2.94437e+07	3.42181e+07
O75368	O75368	SH3 domain-binding glutamic acid-rich-like protein	SH3BGRL	1.02381e+07	1.0425e+07	9.02151e+06	1.30539e+07	6.31362e+06	1.14466e+07
Q99961;Q99961-3;Q99961-2;M0QYE0;M0R0I3;Q99962	Q99961;Q99961-3;Q99961-2	Endophilin-A2	SH3GL1	1.98396e+07	1.44521e+07	8.39495e+06	1.19512e+07	1.63992e+07	1.51651e+07
I3L1P8;Q02978;Q02978-2	I3L1P8;Q02978;Q02978-2	Mitochondrial 2-oxoglutarate/malate carrier protein	SLC25A11	7.10048e+06	7.37201e+06	6.14859e+06	8.01181e+06	7.33745e+06	5.18105e+06
P09012;M0R268;M0QZG7;M0R0G9;M0QXK2;M0R221;M0R2B8	P09012;M0R268;M0QZG7	U1 small nuclear ribonucleoprotein A	SNRPA	7.32618e+06	8.29646e+06	7.89695e+06	8.25665e+06	8.11998e+06	6.11186e+06
P62306	P62306	Small nuclear ribonucleoprotein F	SNRPF	6.58159e+06	6.51626e+06	5.6788e+06	7.00941e+06	6.58393e+06	6.80024e+06
C9J0K6;P30626-2;P30626;P30626-3;B4DHQ6	C9J0K6;P30626-2;P30626;P30626-3;B4DHQ6	Sorcin	SRI	1.17249e+07	1.19312e+07	1.1931e+07	3.26226e+07	2.92476e+07	2.66563e+07
P46977;P46977-2;A0A0C4DH80;E9PN73;E9PI32;H0YET6	P46977;P46977-2	Dolichyl-diphosphooligosaccharide--protein glycosyltransferase subunit STT3A	STT3A	1.88899e+07	1.49633e+07	1.43004e+07	2.87389e+07	2.02122e+07	2.72613e+07
Q13148;A0A087WX29;B1AKP7;G3V162;A0A087X260;A0A087WYY0;K7EJM5;K7EN94;A0A1W2PNU8;K7EJ99;A0A0A0MSV7;A0A087WXQ5;A0A087WV68;Q13148-4;A0A087WZM1;A0A087WYE7;A0A087WZC9;A0A087WW61;A0A087WX67;A0A087WXV3	Q13148;A0A087WX29;B1AKP7;G3V162;A0A087X260;A0A087WYY0;K7EJM5;K7EN94;A0A1W2PNU8	TAR DNA-binding protein 43	TARDBP	2.5667e+07	2.74343e+07	3.24555e+07	3.04905e+07	2.77825e+07	2.70262e+07
E5RHG8;Q15369;R4GMY8;Q15369-2	E5RHG8;Q15369;R4GMY8;Q15369-2	Transcription elongation factor B polypeptide 1	TCEB1	1.35584e+07	1.77902e+07	1.83926e+07	2.16325e+07	2.2366e+07	2.13921e+07
P61088;F8VSD4;F8VV71;F8VZ29;F8VQQ8;Q5JXB2	P61088;F8VSD4;F8VV71;F8VZ29;F8VQQ8	Ubiquitin-conjugating enzyme E2 N	UBE2N	2.68798e+07	2.31032e+07	2.04366e+07	6.47311e+07	6.02752e+07	5.20599e+07
Q9NYU2-2;Q9NYU2;H7BZG0	Q9NYU2-2;Q9NYU2	UDP-glucose:glycoprotein glucosyltransferase 1	UGGT1	1.00512e+07	1.64462e+07	1.17452e+07	9.94287e+06	1.28112e+07	1.07462e+07
P50552;K7EM16;K7EQD0	P50552	Vasodilator-stimulated phosphoprotein	VASP	7.79444e+06	8.10386e+06	5.49403e+06	1.11105e+07	8.51171e+06	8.0353e+06
Q96QK1;I3L4S0;A0A1W2PP10;I3L4P4	Q96QK1	Vacuolar protein sorting-associated protein 35	VPS35	1.77085e+07	1.67894e+07	1.6739e+07	1.70499e+07	1.8809e+07	2.13597e+07
P54577;A0A0C4DGZ5	P54577;A0A0C4DGZ5	Tyrosine--tRNA ligase, cytoplasmic;Tyrosine--tRNA ligase, cytoplasmic, N-terminally processed;Tyrosine--tRNA ligase	YARS	1.49861e+07	1.35174e+07	1.07524e+07	2.23017e+07	3.19785e+07	2.60755e+07
Q04917;A2IDB2	Q04917;A2IDB2	14-3-3 protein eta	YWHAH	2.60758e+07	1.44832e+07	1.37796e+07	1.40231e+07	1.55566e+07	2.29357e+07
A2A274;Q99798	A2A274;Q99798	Aconitate hydratase, mitochondrial	ACO2	1.80461e+07	1.69906e+07	1.97217e+07	5.334e+07	5.42258e+07	5.37595e+07
P43304-2;P43304;F5GYK7	P43304-2;P43304;F5GYK7	Glycerol-3-phosphate dehydrogenase, mitochondrial;Glycerol-3-phosphate dehydrogenase	GPD2	1.13088e+07	1.27105e+07	1.14864e+07	1.12034e+07	1.05666e+07	1.39063e+07
P04181;P04181-2	P04181;P04181-2	Ornithine aminotransferase, mitochondrial;Ornithine aminotransferase, hepatic form;Ornithine aminotransferase, renal form	OAT	9.92705e+06	1.17925e+07	1.05584e+07	1.05546e+07	9.85313e+06	8.67046e+06
P22695;H3BRG4;H3BSJ9;H3BP04;H3BUE4;H3BUI9;A0A087WVZ4	P22695;H3BRG4;H3BSJ9	Cytochrome b-c1 complex subunit 2, mitochondrial	UQCRC2	1.46892e+07	1.98747e+07	1.12562e+07	2.27669e+07	2.48429e+07	2.50387e+07
O95817;C9JFK9	O95817;C9JFK9	BAG family molecular chaperone regulator 3	BAG3	2.16605e+07	1.26688e+07	1.49655e+07	1.18964e+07	1.64043e+07	9.51846e+06
Q08257;A6NP24;Q08257-3;C9JH92;Q08257-2	Q08257;A6NP24;Q08257-3;C9JH92;Q08257-2	Quinone oxidoreductase	CRYZ	5.63028e+07	6.09668e+07	6.0369e+07	2.45026e+07	2.62089e+07	2.60887e+07
A0A024R571;Q9H4M9;C9JC03;C9J2Z4;C9JIJ3;C9IZH1;C9JDQ8	A0A024R571;Q9H4M9;C9JC03;C9J2Z4	EH domain-containing protein 1	EHD1	4.66262e+07	4.94988e+07	5.66045e+07	1.47423e+07	1.82577e+07	1.75762e+07
P60228;E5RGA2;H0YBR5;E5RIT4;E5RHS5;H0YAW4;E5RIP5;E5RJ25;H0YBP5;E5RII3	P60228;E5RGA2;H0YBR5	Eukaryotic translation initiation factor 3 subunit E	EIF3E	2.0477e+07	1.63064e+07	2.70925e+07	1.62542e+07	2.01186e+07	2.31232e+07
Q9BSJ8;Q9BSJ8-2;F8VZB1	Q9BSJ8;Q9BSJ8-2	Extended synaptotagmin-1	ESYT1	3.28718e+07	2.78043e+07	4.37562e+07	1.80266e+07	2.02793e+07	1.1105e+07
Q92820	Q92820	Gamma-glutamyl hydrolase	GGH	1.83637e+07	2.12174e+07	2.13446e+07	1.32172e+07	1.37093e+07	1.40452e+07
P07686;Q5URX0;H0Y9B6;H0YA83;D6REQ8	P07686;Q5URX0;H0Y9B6;H0YA83	Beta-hexosaminidase subunit beta;Beta-hexosaminidase subunit beta chain B;Beta-hexosaminidase subunit beta chain A	HEXB	1.39074e+07	1.79427e+07	2.23098e+07	1.19246e+07	1.56773e+07	1.74972e+07
A0A0A0MTH3;Q13418-2;Q13418;Q13418-3;A0A087WWY6	A0A0A0MTH3;Q13418-2;Q13418;Q13418-3	Integrin-linked protein kinase	ILK	2.8924e+07	2.94331e+07	2.94547e+07	1.57155e+07	2.14295e+07	2.10433e+07
Q15136;P17612-2;P17612;K7ERP6;B1APF7;B1APG1;B1APG0;B1APG2;B1APF8;B1APF9;B1APG3;A0A087WVC4;A0A0A0MS54;P22694-8;P22694-10;P22694-4;P22694-3;P22694;P22694-5;P22694-7;P22694-6;P22694-9;P22694-2	Q15136;P17612-2;P17612;K7ERP6	cAMP-dependent protein kinase catalytic subunit alpha	KIN27;PRKACA	1.31778e+07	1.50576e+07	2.57274e+07	1.06456e+07	1.2866e+07	9.28586e+06
O00629;H7C4F6	O00629	Importin subunit alpha-3	KPNA4	1.09398e+07	1.22077e+07	6.87729e+06	7.16171e+06	8.44335e+06	7.46489e+06
P49257	P49257	Protein ERGIC-53	LMAN1	2.38891e+07	2.56236e+07	2.47866e+07	1.95932e+07	2.01737e+07	2.04536e+07
P30419;P30419-2;B7Z8J4;K7EN82;K7EN42	P30419;P30419-2	Glycylpeptide N-tetradecanoyltransferase 1	NMT1	1.04358e+07	1.45207e+07	1.02479e+07	1.29699e+07	1.25263e+07	1.3055e+07
Q13177;H7C1X3;A0A087X294;O75914-2;O75914;O75914-4;O75914-3;H0YCG5;E9PM17;B3KNX7;Q13153;Q13153-2;B1AKS5	Q13177	Serine/threonine-protein kinase PAK 2;PAK-2p27;PAK-2p34	PAK2	2.32612e+07	2.10242e+07	1.78888e+07	2.2265e+07	2.82116e+07	2.64627e+07
F2Z2Y4;O00764;O00764-3;O00764-2	F2Z2Y4;O00764;O00764-3;O00764-2	Pyridoxal kinase	PDXK	2.66209e+07	3.13512e+07	4.51542e+07	2.21997e+07	2.1065e+07	2.15543e+07
Q9UHV9	Q9UHV9	Prefoldin subunit 2	PFDN2	1.38142e+07	1.27552e+07	1.11798e+07	1.41947e+07	1.64446e+07	1.48438e+07
A6PVN5;Q15257-3;Q15257-2;Q15257;F6WIT2;Q68CR8;Q15257-4;B7ZBQ0;A6PVN6;Q5T949;Q5T948;A6PVN9;A6PVN7;A6PVN8;C9IZ76;B7ZBP9;B7ZBP7;B4DDQ6;H0Y6E5	A6PVN5;Q15257-3;Q15257-2;Q15257;F6WIT2;Q68CR8;Q15257-4;B7ZBQ0;A6PVN6;Q5T949;Q5T948;A6PVN9	Serine/threonine-protein phosphatase 2A activator	PPP2R4;DKFZp781M17165	8.26658e+06	1.06238e+07	1.04022e+07	7.24404e+06	7.49938e+06	7.44625e+06
P46063;F5H2L2;F8WA66;F8WD97;F5GYB7;F5H4P4;F5H3W0	P46063	ATP-dependent DNA helicase Q1	RECQL	5.23047e+07	7.7318e+07	6.0369e+07	4.42585e+07	4.11647e+07	4.03934e+07
P62266;D6RD47;D6RDJ2;D6RIX0;D6R9I7	P62266;D6RD47	40S ribosomal protein S23	RPS23	3.21747e+07	3.82721e+07	3.72159e+07	4.03269e+07	2.35657e+07	2.83138e+07
Q12765;Q12765-2;C9K052;B8ZZP4;C9J7U9;Q12765-3	Q12765;Q12765-2;C9K052;B8ZZP4;C9J7U9;Q12765-3	Secernin-1	SCRN1	9.97433e+06	1.26485e+07	1.7001e+07	1.07056e+07	1.2898e+07	1.11212e+07
J3QL05;J3KP15;Q01130-2;Q01130;Q9BRL6-2;Q9BRL6	J3QL05;J3KP15;Q01130-2;Q01130	Serine/arginine-rich splicing factor 2	SRSF2	2.026e+07	1.25012e+07	1.62362e+07	9.35016e+06	9.15753e+06	1.00274e+07
Q9UJZ1;A0A087WYB4;Q9UJZ1-2;F2Z2I8	Q9UJZ1;A0A087WYB4;Q9UJZ1-2	Stomatin-like protein 2, mitochondrial	STOML2	8.85257e+06	8.83121e+06	6.83879e+06	6.61389e+06	6.39064e+06	7.16723e+06
K7EP07;Q99426-2;Q99426;K7EK42;K7EL99;K7EQH0;K7ER04	K7EP07;Q99426-2;Q99426;K7EK42	Tubulin-folding cofactor B	TBCB	2.37874e+07	1.57685e+07	1.45401e+07	1.21647e+07	1.66821e+07	8.98759e+06
P49755;G3V2K7	P49755;G3V2K7	Transmembrane emp24 domain-containing protein 10	TMED10	4.31197e+07	4.89598e+07	5.5215e+07	2.16223e+07	2.15244e+07	2.23925e+07
F5GX39;Q15363;E7EQ72	F5GX39;Q15363;E7EQ72	Transmembrane emp24 domain-containing protein 2	TMED2	3.79936e+07	2.4109e+07	3.88006e+07	1.70202e+07	1.78612e+07	1.9885e+07
Q9UMX0;Q9UMX0-2;Q9UMX0-3;H0YDS0;Q9NRR5;Q9UMX0-4	Q9UMX0;Q9UMX0-2;Q9UMX0-3	Ubiquilin-1	UBQLN1	1.89318e+07	1.56692e+07	1.71039e+07	9.72456e+06	8.8168e+06	9.03685e+06
P16989-2;P16989;P16989-3;A0A0D9SEI8	P16989-2;P16989;P16989-3	Y-box-binding protein 3	YBX3	2.33943e+07	2.04511e+07	2.23883e+07	2.45261e+07	2.50288e+07	2.55576e+07
P49588;P49588-2;H3BPK7	P49588;P49588-2	Alanine--tRNA ligase, cytoplasmic	AARS	6.89513e+07	8.87892e+07	9.45703e+07	1.70407e+08	1.76826e+08	1.83394e+08
P61221;D6R9I9;D6RGF4;H0Y990	P61221;D6R9I9	ATP-binding cassette sub-family E member 1	ABCE1	5.30762e+07	5.09932e+07	3.89989e+07	5.59526e+07	4.58026e+07	5.46352e+07
P49748;P49748-3;P49748-2;K7EQP4;G3V1M7;J3KS89;K7EJW8;J3QRJ8;J3QKU9;J3KSR4	P49748;P49748-3;P49748-2	Very long-chain specific acyl-CoA dehydrogenase, mitochondrial	ACADVL	5.68814e+07	5.88694e+07	5.26417e+07	5.57619e+07	5.48401e+07	4.38464e+07
P53396-2;P53396;P53396-3;K7ESG8;K7EIE7	P53396-2;P53396;P53396-3	ATP-citrate synthase	ACLY	2.84942e+08	3.05154e+08	3.32849e+08	1.32855e+08	1.30787e+08	1.27884e+08
O00154-6;O00154-4;O00154-7;O00154;O00154-5;K7EKP8;O00154-2;O00154-3	O00154-6;O00154-4;O00154-7;O00154;O00154-5;K7EKP8;O00154-2;O00154-3	Cytosolic acyl coenzyme A thioester hydrolase	ACOT7	1.824e+07	1.32516e+07	1.45741e+07	2.85583e+07	2.72548e+07	3.82022e+07
P68032;P63267;P62736;P68133;A6NL76;P63267-2;C9JFL5;F6UVQ4;F6QUT6;F8WB63;B8ZZJ2	P68032;P63267;P62736;P68133;A6NL76;P63267-2	Actin, alpha cardiac muscle 1;Actin, gamma-enteric smooth muscle;Actin, aortic smooth muscle;Actin, alpha skeletal muscle	ACTC1;ACTG2;ACTA2;ACTA1	1.13318e+09	9.27449e+08	1.03399e+09	1.09677e+09	9.992e+08	9.22303e+08
P63261;I3L3I0;I3L1U9;I3L4N8;I3L3R2;K7EM38;J3KT65	P63261	Actin, cytoplasmic 2;Actin, cytoplasmic 2, N-terminally processed	ACTG1	1.24724e+10	1.15192e+10	1.13103e+10	1.09514e+10	1.16393e+10	1.12489e+10
P12814;G3V2N5;G3V2W4;P35609-2;P35609;Q08043;A0A087WSZ2;G3V5M4;G3V2X9;G3V380;G3V2E8	P12814	Alpha-actinin-1	ACTN1	3.27344e+08	3.34176e+08	3.50043e+08	2.38442e+08	2.16504e+08	2.23762e+08
O43707;O43707-2;F5GXS2;O43707-3;H7C144;K7EJH8;K7EP19	O43707;O43707-2;F5GXS2;O43707-3	Alpha-actinin-4	ACTN4	9.84853e+08	9.45083e+08	1.04275e+09	9.2205e+08	9.1722e+08	9.35174e+08
P61163;R4GMT0;A0A1B0GVS3	P61163;R4GMT0	Alpha-centractin	ACTR1A	3.63625e+07	4.21744e+07	3.75362e+07	2.9506e+07	3.425e+07	3.70052e+07
P61160;P61160-2;F5H6T1;A0A1B0GWD0;A0A1B0GWH0	P61160;P61160-2;F5H6T1	Actin-related protein 2	ACTR2	7.03884e+07	6.90725e+07	5.843e+07	5.79603e+07	5.47451e+07	5.44599e+07
P61158;B4DXW1;Q9P1U1-2;Q9P1U1;F8WDR7;A0A0A0MTI9;H7C4J1;C9IZN3;Q9C0K3;Q9P1U1-3;F8WEW2;F8WE84	P61158;B4DXW1	Actin-related protein 3	ACTR3	1.37921e+08	1.29335e+08	1.34826e+08	1.30621e+08	1.27183e+08	1.09976e+08
P11766;H0YAG8;D6RFE4;D6R9G2;D6RAY0	P11766;H0YAG8	Alcohol dehydrogenase class-3	ADH5	4.73044e+07	4.87762e+07	5.2e+07	6.62246e+07	6.60355e+07	6.67963e+07
P55263;P55263-3;P55263-2;P55263-4	P55263;P55263-3;P55263-2;P55263-4	Adenosine kinase	ADK	1.70628e+07	2.50472e+07	2.84863e+07	1.79466e+07	1.77135e+07	1.39864e+07
P23526;P23526-2	P23526;P23526-2	Adenosylhomocysteinase	AHCY	1.27837e+08	1.28278e+08	1.29682e+08	1.04515e+08	1.07101e+08	1.10219e+08
Q09666;E9PKR9;E9PLK4;E9PQE3;E9PJZ0;E9PJC6;Q09666-2;P48552	Q09666	Neuroblast differentiation-associated protein AHNAK	AHNAK	1.22344e+09	1.19931e+09	1.11427e+09	1.4421e+09	1.48081e+09	1.34857e+09
O95433-2;O95433;H0YJ63;G3V438;H0YJG7;H0YJU2	O95433-2;O95433;H0YJ63;G3V438;H0YJG7	Activator of 90 kDa heat shock protein ATPase homolog 1	AHSA1	3.62042e+07	4.85969e+07	2.13647e+07	1.3763e+07	1.33141e+07	1.5306e+07
Q5T9B7;P00568;H0YID2;H0Y4J6;Q9Y6K8-2;Q9Y6K8-3;Q9Y6K8	Q5T9B7;P00568;H0YID2;H0Y4J6	Adenylate kinase isoenzyme 1	AK1	9.63238e+06	1.73247e+07	1.13326e+07	1.26326e+07	1.10023e+07	1.62577e+07
F8W1A4;P54819-5;P54819-2;P54819;F8VY04;P54819-3;G3V213;F8VZG5;P54819-6;F8VPP1;P54819-4	F8W1A4;P54819-5;P54819-2;P54819;F8VY04;P54819-3;G3V213;F8VZG5;P54819-6	Adenylate kinase 2, mitochondrial;Adenylate kinase 2, mitochondrial;Adenylate kinase 2, mitochondrial, N-terminally processed	AK2	2.33713e+07	3.8492e+07	2.81554e+07	3.67298e+07	3.13053e+07	2.76627e+07
Q04828;H0Y804;A6NHU4	Q04828;H0Y804	Aldo-keto reductase family 1 member C1	AKR1C1	4.56198e+08	1.84177e+08	1.91574e+08	3.27787e+09	3.55086e+09	3.52711e+09
P47895;H0Y2X5;H0YNQ3;H0YKF9;P00352;P30837	P47895;H0Y2X5	Aldehyde dehydrogenase family 1 member A3	ALDH1A3	2.00524e+08	2.15227e+08	2.30056e+08	1.99104e+07	1.38097e+07	1.30297e+07
P04075;H3BQN4;J3KPS3;P04075-2;H3BPS8;H3BUH7;H3BR04;H3BMQ8;H3BU78;H3BR68	P04075;H3BQN4;J3KPS3;P04075-2;H3BPS8;H3BUH7;H3BR04	Fructose-bisphosphate aldolase A;Fructose-bisphosphate aldolase	ALDOA	2.64888e+09	2.32295e+09	2.4113e+09	2.29383e+09	2.262e+09	2.09188e+09
P09972;A8MVZ9;J3KSV6;J3QKP5;C9J8F3;J3QKK1;K7EKH5;A0A087WXX2;P05062	P09972;A8MVZ9;J3KSV6;J3QKP5;C9J8F3	Fructose-bisphosphate aldolase C;Fructose-bisphosphate aldolase	ALDOC	1.49431e+08	1.893e+08	2.12714e+08	1.42077e+08	1.07566e+08	1.0009e+08
E9PB61;Q86V81	E9PB61;Q86V81	THO complex subunit 4	ALYREF	2.61387e+07	3.0081e+07	3.19474e+07	3.35306e+07	3.65205e+07	2.90938e+07
P04083;Q5T3N1;Q5T3N0	P04083	Annexin A1	ANXA1	1.03219e+09	9.9715e+08	1.07365e+09	6.31804e+08	6.42276e+08	6.32237e+08
P07355;P07355-2;H0YN42;H0YMD0;H0YMU9;H0YM50;A6NMY6;H0YKS4;H0YNP5;H0YN28;H0YL33;H0YMM1;H0YNA0;H0YKZ7;H0YLV6;H0YMT9;H0YKX9;H0YN52;H0YKL9;H0YMW4;H0YKV8;H0YMD9;H0YNB8;H0YKN4;H0YLE2	P07355;P07355-2;H0YN42;H0YMD0;H0YMU9;H0YM50;A6NMY6;H0YKS4;H0YNP5	Annexin A2;Annexin;Putative annexin A2-like protein	ANXA2;ANXA2P2	2.18334e+09	2.09506e+09	2.20404e+09	2.13866e+09	2.16288e+09	2.1006e+09
P08758;D6RBL5;D6RBE9;E9PHT9;D6RCN3	P08758;D6RBL5;D6RBE9	Annexin A5;Annexin	ANXA5	6.32298e+08	6.27205e+08	8.36737e+08	4.53297e+08	4.21786e+08	4.84072e+08
P08133;P08133-2;E7EMC6;E5RK63;E5RJF5;E5RI05;E5RFF0;E5RJR0;E5RIU8	P08133;P08133-2	Annexin A6	ANXA6	2.00891e+08	1.89023e+08	2.00431e+08	3.50792e+08	3.61323e+08	3.74451e+08
O95782-2;O95782;M0R2D9	O95782-2;O95782	AP-2 complex subunit alpha-1	AP2A1	3.63982e+07	2.97533e+07	4.24558e+07	3.59096e+07	4.26256e+07	3.65968e+07
P63010-3;P63010;P63010-2;A0A087X253;A0A087WU93;A0A087WZQ6;A0A087WYD1;K7EN71;K7ERB2;K7EJ01;K7EJX1;H7C034	P63010-3;P63010;P63010-2;A0A087X253;A0A087WU93;A0A087WZQ6;A0A087WYD1	AP-2 complex subunit beta	AP2B1	8.74019e+07	7.18296e+07	8.73703e+07	8.59698e+07	9.401e+07	1.02912e+08
A0A087WY71;E9PFW3;Q96CW1-2;Q96CW1;C9JJ47;C9JTK4;C9JGT8;C9JJD3;C9JPV8	A0A087WY71;E9PFW3;Q96CW1-2;Q96CW1;C9JJ47;C9JTK4;C9JGT8	AP-2 complex subunit mu	AP2M1	2.54699e+07	2.96797e+07	2.62546e+07	3.14301e+07	3.104e+07	2.55161e+07
P27695;G3V5Q1;G3V3M6;A0A0C4DGK8;H7C4A8;G3V5M0;G3V359;G3V3C7;G3V5D9;G3V3Y6	P27695;G3V5Q1;G3V3M6;A0A0C4DGK8;H7C4A8;G3V5M0;G3V359;G3V3C7	DNA-(apurinic or apyrimidinic site) lyase;DNA-(apurinic or apyrimidinic site) lyase, mitochondrial	APEX1	2.54573e+07	2.80807e+07	2.69154e+07	2.70658e+07	2.59694e+07	2.37921e+07
Q9HDC9;H0Y512;Q9HDC9-2	Q9HDC9;H0Y512;Q9HDC9-2	Adipocyte plasma membrane-associated protein	APMAP	2.07495e+07	1.71336e+07	1.72004e+07	5.26524e+07	6.10444e+07	6.14044e+07
P07741;H3BQZ9;P07741-2;H3BQF1;H3BQB1;H3BSW3	P07741;H3BQZ9;P07741-2;H3BQF1;H3BQB1;H3BSW3	Adenine phosphoribosyltransferase	APRT	1.39137e+07	2.15024e+07	1.73743e+07	2.36126e+07	2.88211e+07	2.95326e+07
P48444;B0YIW6;P48444-2;Q6P1Q5;E9PK34	P48444;B0YIW6;P48444-2	Coatomer subunit delta	ARCN1	3.54851e+07	3.40965e+07	4.10981e+07	4.18867e+07	3.82148e+07	4.13978e+07
P84077;P61204;F5H423;F5H0C7;P61204-2;H0YGG7	P84077;P61204;F5H423;F5H0C7;P61204-2	ADP-ribosylation factor 1;ADP-ribosylation factor 3	ARF1;ARF3	2.6687e+07	2.51337e+07	2.59671e+07	2.65823e+07	2.52456e+07	2.7984e+07
P18085;C9JAK5;C9JPM4;U3KQF2	P18085;C9JAK5;C9JPM4;U3KQF2	ADP-ribosylation factor 4	ARF4	1.06662e+08	1.10261e+08	9.70715e+07	8.78581e+07	9.65912e+07	9.26205e+07
Q07960;H0YE29;E9PNR6	Q07960;H0YE29;E9PNR6	Rho GTPase-activating protein 1	ARHGAP1	4.49573e+07	3.92968e+07	4.06208e+07	4.36291e+07	4.78108e+07	4.55825e+07
P52565;J3KTF8;J3QQX2;J3KRE2;J3KRY1;P52565-2;J3KS60	P52565;J3KTF8;J3QQX2;J3KRE2;J3KRY1;P52565-2	Rho GDP-dissociation inhibitor 1	ARHGDIA	2.17779e+08	2.29808e+08	2.31594e+08	1.16665e+08	1.23383e+08	1.27357e+08
A0A1W2PNV4;E9PF58;Q92747-2;F8WFD3	A0A1W2PNV4;E9PF58		ARPC1A	3.19147e+07	3.96309e+07	3.17204e+07	2.87226e+07	3.05754e+07	2.89499e+07
O15144;H7C3F9;G5E9S7;C9JTV5;G5E9J0	O15144	Actin-related protein 2/3 complex subunit 2	ARPC2	4.98245e+07	5.94639e+07	5.23744e+07	4.06798e+07	4.55373e+07	4.55521e+07
O15145;C9JZD1;F8VR50	O15145;C9JZD1	Actin-related protein 2/3 complex subunit 3	ARPC3	3.36569e+07	3.48458e+07	2.42117e+07	3.33082e+07	2.27242e+07	1.59739e+07
F8WCF6;P59998;P59998-3;R4GN08;H7C0A3;P59998-4;F8WDD7;A0A0A6YYG9;P59998-2	F8WCF6;P59998;P59998-3;R4GN08;H7C0A3;P59998-4;F8WDD7;A0A0A6YYG9;P59998-2	Actin-related protein 2/3 complex subunit 4	ARPC4-TTLL3;ARPC4	2.76168e+07	2.84244e+07	2.38637e+07	2.1509e+07	2.14956e+07	2.20702e+07
O15511;B1ALC0;O15511-2	O15511;B1ALC0;O15511-2	Actin-related protein 2/3 complex subunit 5	ARPC5	2.19802e+07	2.32369e+07	2.81097e+07	2.47348e+07	2.53086e+07	2.37191e+07
A0A087WXS7;O43681;K7ERW9	A0A087WXS7;O43681	ATPase ASNA1	ASNA1	1.52954e+07	1.89151e+07	1.65788e+07	1.21511e+07	1.83878e+07	1.56232e+07
Q12797-10;Q12797;E5RG29;A0A0A0MSK8;E5RG56;Q12797-9;Q12797-6;Q12797-5;Q12797-8;Q12797-2;E5RHJ2;E5RHK2;G3XAN5;A0A087WUJ2;A0A087WW51;Q12797-7;Q12797-4;Q12797-3	Q12797-10;Q12797	Aspartyl/asparaginyl beta-hydroxylase	ASPH	8.92993e+07	1.04605e+08	1.09719e+08	5.1723e+07	4.85222e+07	4.78416e+07
P31939;P31939-2;H7C1S2;F8WEF0;C9JLK0	P31939;P31939-2	Bifunctional purine biosynthesis protein PURH;Phosphoribosylaminoimidazolecarboxamide formyltransferase;IMP cyclohydrolase	ATIC	5.01127e+07	4.70994e+07	5.07887e+07	4.65386e+07	4.78181e+07	4.18853e+07
F5H6I7;Q6DD88;F5GWF8	F5H6I7;Q6DD88	Atlastin-3	ATL3	5.90723e+07	5.8372e+07	6.74895e+07	4.49961e+07	4.42942e+07	4.88623e+07
P05023-4;P05023;P05023-3;P05023-2;M0R116;A0A0A0MT26;P13637;P13637-2;P13637-3;B1AKY9;P50993;H0Y7C1;Q13733;Q5TC01;Q5TC02;P20648;P54707;P54707-2;M0QXF2;E9PRA5	P05023-4;P05023;P05023-3;P05023-2	Sodium/potassium-transporting ATPase subunit alpha-1	ATP1A1	4.6535e+07	4.72669e+07	5.17359e+07	5.15027e+07	4.86689e+07	4.33224e+07
P16615-5;P16615-2;P16615-3;P16615;P16615-4;H7C5W9;O14983-3;O14983-2;O14983;Q93084-4;Q93084-2;Q93084-3;Q93084-7;Q93084;Q93084-6;Q93084-5;A0A0C4DH86;J3QSY6;H3BTW4	P16615-5;P16615-2;P16615-3;P16615;P16615-4;H7C5W9	Sarcoplasmic/endoplasmic reticulum calcium ATPase 2	ATP2A2	4.21993e+07	4.54289e+07	3.97711e+07	2.79299e+07	2.86487e+07	2.9485e+07
P25705;P25705-2;P25705-3;K7EK77;K7ERX7;K7ENJ4;K7EJP1;K7EQH4;K7ESA0	P25705;P25705-2;P25705-3	ATP synthase subunit alpha, mitochondrial	ATP5A1	1.23591e+08	1.12182e+08	1.46738e+08	1.68265e+08	1.91817e+08	1.8609e+08
O75531	O75531	Barrier-to-autointegration factor;Barrier-to-autointegration factor, N-terminally processed	BANF1	6.39583e+07	6.18282e+07	7.10227e+07	6.53911e+07	5.81668e+07	5.08315e+07
P80723;P80723-2;U3KQP0	P80723;P80723-2	Brain acid soluble protein 1	BASP1	4.09875e+08	2.98131e+08	2.54113e+08	3.15963e+08	2.60623e+08	2.26651e+08
P51572;P51572-2;C9JMD7;C9JSP1;C9JQ75;C9J0M4;C9JM14	P51572;P51572-2;C9JMD7;C9JSP1;C9JQ75;C9J0M4;C9JM14	B-cell receptor-associated protein 31	BCAP31	2.10378e+07	2.04895e+07	1.91277e+07	1.52707e+07	1.71642e+07	2.25911e+07
P53004;C9J1E1	P53004	Biliverdin reductase A	BLVRA	2.18921e+07	2.41122e+07	2.37375e+07	2.36065e+07	2.24558e+07	2.37222e+07
P30043;M0R192;M0QZL1	P30043;M0R192;M0QZL1	Flavin reductase (NADPH)	BLVRB	8.67048e+07	6.81097e+07	8.20264e+07	1.40782e+08	1.23425e+08	1.25655e+08
A0A087X2B5;P35613-4;P35613-2;P35613;I3L192;A0A087WUV8;P35613-3;R4GMX5;R4GN83	A0A087X2B5;P35613-4;P35613-2;P35613;I3L192;A0A087WUV8;P35613-3;R4GMX5	Basigin	BSG	3.48541e+07	4.1581e+07	4.00533e+07	2.61089e+07	2.16959e+07	2.2734e+07
J3QT28;O43684-2;O43684;J3QSX4	J3QT28;O43684-2;O43684;J3QSX4	Mitotic checkpoint protein BUB3	BUB3	1.38781e+07	1.25482e+07	1.49284e+07	1.60512e+07	1.10095e+07	1.44243e+07
Q07021;I3L3Q7;I3L3B0	Q07021;I3L3Q7;I3L3B0	Complement component 1 Q subcomponent-binding protein, mitochondrial	C1QBP	9.13508e+07	7.50968e+07	9.19207e+07	8.68196e+07	9.48256e+07	9.85779e+07
Q9HB71-3;Q9HB71	Q9HB71-3;Q9HB71	Calcyclin-binding protein	CACYBP	1.92065e+07	1.56745e+07	2.50029e+07	2.61793e+07	2.21068e+07	3.23532e+07
Q05682-5;Q05682-4;E9PGZ1;E7EX44;Q05682-3;Q05682-6;Q05682-2;Q05682;C9J813;C9JEK3;REV__H0YH95;REV__H0YEF9;REV__E9PJZ7;REV__H0YHK3;REV__O75334-6;REV__O75334-5;REV__Q13136-2;REV__Q13136;REV__O75334-2;REV__O75334-4;REV__G3V200;REV__O75334-3;REV__O75334	Q05682-5;Q05682-4;E9PGZ1;E7EX44;Q05682-3;Q05682-6;Q05682-2;Q05682;C9J813	Caldesmon	CALD1	3.76037e+08	2.58574e+08	2.50125e+08	6.326e+08	6.05674e+08	5.42085e+08
P0DP25;P0DP24;P0DP23;H0Y7A7;E7ETZ0;E7EMB3;Q96HY3;G3V361;G3V226;M0QZ52;F8WBR5;G3V479;P27482;C9J7T9;P02585	P0DP25;P0DP24;P0DP23;H0Y7A7;E7ETZ0;E7EMB3;Q96HY3;G3V361		CALM2;CALM1	4.29226e+08	3.61587e+08	3.59759e+08	2.95213e+08	2.74283e+08	2.92529e+08
P27797;K7EJB9;K7EL50	P27797;K7EJB9	Calreticulin	CALR	8.01783e+08	7.88839e+08	7.5204e+08	9.16847e+07	5.13141e+07	8.6505e+07
Q86VP6;Q86VP6-2;A0A0C4DGH5;H0YH27;Q86VP6-3;O75155-2	Q86VP6;Q86VP6-2;A0A0C4DGH5	Cullin-associated NEDD8-dissociated protein 1	CAND1	4.35589e+07	4.20069e+07	5.1232e+07	4.59602e+07	4.53411e+07	3.96687e+07
P27824;P27824-2;P27824-3;D6RGY2;H0Y9Q7;D6RDP7;D6RAU8;D6RB85;D6RFL1;D6RAQ8;H0Y9H1;D6RHJ3;D6RD16	P27824;P27824-2;P27824-3	Calnexin	CANX	3.11075e+08	2.97885e+08	3.23112e+08	2.36942e+08	2.25725e+08	2.34465e+08
Q01518;Q01518-2;Q5T0R1;Q5T0R7;Q5T0R6;Q5T0R5;Q5T0R4;Q5T0R3;Q5T0R2;Q5T0R9;Q5T0S3;Q5T0R8	Q01518;Q01518-2	Adenylyl cyclase-associated protein 1	CAP1	2.29603e+08	2.3459e+08	2.25135e+08	1.69693e+08	1.53873e+08	1.63793e+08
P07384;E9PRM1;E9PJJ3;E9PLC9;E9PMC6;E9PJA6;E9PSA6;E9PQB3;E9PLX0;E9PL37	P07384	Calpain-1 catalytic subunit	CAPN1	3.7915e+07	3.56389e+07	3.30717e+07	2.63823e+07	3.01231e+07	3.19356e+07
P17655;P17655-2;C9JWY7	P17655;P17655-2	Calpain-2 catalytic subunit	CAPN2	1.3528e+08	1.46552e+08	1.39748e+08	3.90129e+07	2.43969e+07	3.82164e+07
A0A0C4DGQ5;P04632;K7ELJ7;A0A075B7C0;K7EKD8;U3KQE2;K7EM73;K7EIV0;U3KPR7;K7ES78;K7EMQ1;Q96L46	A0A0C4DGQ5;P04632;K7ELJ7;A0A075B7C0;K7EKD8;U3KQE2;K7EM73;K7EIV0	Calpain small subunit 1	CAPNS1	1.13989e+08	1.0593e+08	1.16922e+08	6.49259e+07	6.03309e+07	6.385e+07
Q14444-2;Q14444;G3V153;E9PLA9	Q14444-2;Q14444;G3V153;E9PLA9	Caprin-1	CAPRIN1	2.46302e+07	2.82953e+07	2.26121e+07	2.40349e+07	2.61831e+07	2.46364e+07
P52907	P52907	F-actin-capping protein subunit alpha-1	CAPZA1	1.02228e+08	9.95036e+07	1.11236e+08	1.00607e+08	1.13306e+08	1.11749e+08
P47755;C9JUG7;F8W9N7;P47755-2;A0A0D9SET8;F8WED3	P47755;C9JUG7;F8W9N7;P47755-2	F-actin-capping protein subunit alpha-2	CAPZA2	2.67865e+07	3.2885e+07	3.96969e+07	2.35095e+07	1.96742e+07	2.02823e+07
P47756-2;B1AK87;B1AK88;P47756;B1AK85	P47756-2;B1AK87;B1AK88;P47756;B1AK85	F-actin-capping protein subunit beta	CAPZB	8.07737e+07	8.85491e+07	8.23659e+07	8.31766e+07	7.93475e+07	6.8427e+07
Q9Y2V2;H3BSW7;H3BUY4;H3BPY5;H3BNU9;H3BTK3;I3L3X8	Q9Y2V2;H3BSW7;H3BUY4;H3BPY5;H3BNU9;H3BTK3;I3L3X8	Calcium-regulated heat stable protein 1	CARHSP1	3.92945e+07	4.59092e+07	4.31654e+07	3.23482e+07	3.96366e+07	3.16711e+07
P20810-9;P20810-10;P20810-7;P20810-6;E7EVY3;B7Z574;A0A0C4DGB5;P20810-4;P20810-8;P20810;P20810-5;E9PDE4;E7ES10;E9PCH5;P20810-2;H0Y7F0;H0Y9H6;P20810-3;E7EQ12;A0A0A0MR45;E7EQA0;H0YD33;F8W7E0;A0A0C4DGD1;E9PSG1;D6RAA8;D6RC54;H0Y944;H0YA91	P20810-9;P20810-10;P20810-7;P20810-6;E7EVY3;B7Z574;A0A0C4DGB5;P20810-4;P20810-8;P20810;P20810-5;E9PDE4;E7ES10;E9PCH5;P20810-2;H0Y7F0;H0Y9H6;P20810-3;E7EQ12;A0A0A0MR45;E7EQA0;H0YD33	Calpastatin	CAST	2.48598e+07	1.92556e+07	2.6576e+07	2.86613e+07	2.38393e+07	2.5431e+07
Q03135;C9JKI3;E9PCT5;Q03135-2	Q03135;C9JKI3;E9PCT5;Q03135-2	Caveolin-1;Caveolin	CAV1	3.52084e+07	4.77654e+07	4.00002e+07	2.73821e+07	2.494e+07	3.02583e+07
P16152;E9PQ63;A8MTM1;P16152-2	P16152;E9PQ63;A8MTM1;P16152-2	Carbonyl reductase [NADPH] 1	CBR1	5.21065e+07	4.66799e+07	4.3875e+07	3.72001e+07	3.30534e+07	3.586e+07
Q13185;S4R2Y4;C9JMM0;B8ZZ43	Q13185;S4R2Y4	Chromobox protein homolog 3	CBX3	2.90844e+07	2.89197e+07	3.3426e+07	3.88211e+07	4.13557e+07	3.71045e+07
P49368;B4DUR8;P49368-2;E9PRC8;Q5SZX6;E9PQ35;Q5SZX9;Q5SZW8;E9PM09	P49368;B4DUR8;P49368-2	T-complex protein 1 subunit gamma	CCT3	1.23046e+08	1.35643e+08	1.29014e+08	1.25459e+08	1.20647e+08	1.28979e+08
P50991;P50991-2	P50991;P50991-2	T-complex protein 1 subunit delta	CCT4	1.13696e+08	1.13644e+08	1.10801e+08	9.46064e+07	9.28443e+07	9.40779e+07
P48643;B7ZAR1;E9PCA1;E7ENZ3;P48643-2;D6RIZ7;H0Y914	P48643;B7ZAR1;E9PCA1;E7ENZ3;P48643-2	T-complex protein 1 subunit epsilon	CCT5	1.49547e+08	1.40382e+08	1.47141e+08	1.23174e+08	1.3629e+08	1.34138e+08
P40227;P40227-2;Q92526;Q92526-2;Q92526-3;J3KRI6	P40227;P40227-2	T-complex protein 1 subunit zeta	CCT6A	1.09733e+08	1.14829e+08	1.19308e+08	1.01774e+08	1.06007e+08	9.32306e+07
Q99832;Q99832-3;Q99832-4;Q99832-2;F8WAM2;F8WBP8;A0A0D9SG95	Q99832;Q99832-3;Q99832-4;Q99832-2	T-complex protein 1 subunit eta	CCT7	7.95053e+07	7.9519e+07	8.19564e+07	7.21762e+07	7.40218e+07	7.23929e+07
P16070-12;P16070-14;P16070-13;P16070-8;H0YD13;P16070-18;P16070-11;P16070-10;P16070-16;P16070-17;P16070-6;P16070-4;P16070-3;P16070-7;P16070-5;P16070;H0Y2P0;H0YE40;H0Y5E4;P16070-15;H0YDW7;H0YCV9;P16070-9;E9PKC6;H0YDX6;H0YD17;J3KN83;Q86UZ1;H0YF08;P16070-19	P16070-12;P16070-14;P16070-13;P16070-8;H0YD13;P16070-18;P16070-11;P16070-10;P16070-16;P16070-17;P16070-6;P16070-4;P16070-3;P16070-7;P16070-5;P16070;H0Y2P0;H0YE40;H0Y5E4;P16070-15	CD44 antigen	CD44	5.07197e+07	5.03837e+07	6.10945e+07	3.60565e+07	3.95581e+07	3.64589e+07
Q16543;K7EQA9;K7EL68;K7EIU0;K7EKQ2	Q16543;K7EQA9;K7EL68	Hsp90 co-chaperone Cdc37;Hsp90 co-chaperone Cdc37, N-terminally processed	CDC37	3.14147e+07	3.52738e+07	3.15857e+07	2.5406e+07	2.33479e+07	2.30087e+07
P60953;P60953-1;Q5JYX0	P60953;P60953-1;Q5JYX0	Cell division control protein 42 homolog	CDC42	6.40443e+07	5.65147e+07	7.35726e+07	6.78844e+07	6.54645e+07	6.7373e+07
P23528;E9PP50;G3V1A4;E9PK25;E9PQB7;E9PS23;E9PLJ3	P23528;E9PP50;G3V1A4;E9PK25;E9PQB7;E9PS23	Cofilin-1	CFL1	1.2421e+09	1.1627e+09	1.15776e+09	1.19001e+09	1.22114e+09	1.21672e+09
O00299	O00299	Chloride intracellular channel protein 1	CLIC1	1.97044e+08	1.78947e+08	2.09341e+08	2.5559e+08	2.6529e+08	2.81086e+08
Q9Y696	Q9Y696	Chloride intracellular channel protein 4	CLIC4	1.52146e+08	1.38845e+08	1.46229e+08	1.48423e+08	1.36558e+08	1.42286e+08
P09496-2;P09496-4;P09496-3;P09496;F8WF69;P09496-5;C9J8P9	P09496-2;P09496-4;P09496-3;P09496;F8WF69	Clathrin light chain A	CLTA	3.61319e+07	3.55439e+07	1.99211e+07	2.72739e+07	2.62967e+07	1.48651e+07
A0A087WVQ6;Q00610-2;Q00610;J3KS13;P53675-2;P53675;A0A087WX41;K7EJJ5;J3KSQ2;J3KRF5;J3QL20;F5H5N6;A0A087WV74;A0A087WXH4	A0A087WVQ6;Q00610-2;Q00610	Clathrin heavy chain;Clathrin heavy chain 1	CLTC	6.33556e+08	7.5004e+08	7.22563e+08	5.27483e+08	5.34824e+08	5.54997e+08
P30085;Q5T0D2;P30085-2	P30085;Q5T0D2;P30085-2	UMP-CMP kinase	CMPK1	3.01588e+07	3.40453e+07	2.81681e+07	4.48655e+07	4.78893e+07	5.03551e+07
F8W031;F8W1K5;F8VXJ7;F8W0J2;F8VP03	F8W031;F8W1K5;F8VXJ7		CNPY2	9.93543e+06	1.00173e+07	9.85766e+06	7.17661e+06	9.00999e+06	6.19923e+06
P12111-2;P12111;E7ENL6;P12111-4;P12111-5;P12111-3;C9JNG9;I3L392	P12111-2;P12111;E7ENL6;P12111-4	Collagen alpha-3(VI) chain	COL6A3	7.03884e+07	5.63183e+07	7.15849e+07	5.82133e+08	6.96224e+08	5.93369e+08
P21964-2;P21964;E7EMS6;E7EUU8;H7BZ45;F8WBW9	P21964-2;P21964;E7EMS6;E7EUU8	Catechol O-methyltransferase	COMT	3.93438e+07	3.91303e+07	5.96816e+07	3.91118e+07	3.33125e+07	3.48221e+07
P53621;P53621-2	P53621;P53621-2	Coatomer subunit alpha;Xenin;Proxenin	COPA	6.22423e+07	6.14952e+07	6.39891e+07	5.15904e+07	5.92819e+07	5.44264e+07
P53618;E9PP73;E9PP63;E9PKQ1	P53618	Coatomer subunit beta	COPB1	3.70261e+07	5.46895e+07	4.1236e+07	8.64554e+07	5.20792e+07	5.54409e+07
P35606-2;P35606;D6RBT6;D6R997;D6RBZ7;D6RCL6;D6RBG7;H0Y938;H0YAC7	P35606-2;P35606	Coatomer subunit beta	COPB2	3.17522e+07	4.81465e+07	3.11296e+07	3.20064e+07	2.93808e+07	2.296e+07
M0QXB4;O14579;O14579-2;O14579-3;M0R061	M0QXB4;O14579;O14579-2;O14579-3	Coatomer subunit epsilon	COPE	2.17643e+07	2.18397e+07	2.20849e+07	1.91759e+07	2.30887e+07	2.32641e+07
Q9Y678;H0Y8X7;Q9UBF2-2;Q9UBF2;H0Y8G2	Q9Y678	Coatomer subunit gamma-1	COPG1	2.65444e+07	2.51806e+07	2.55863e+07	2.27699e+07	2.69152e+07	2.53245e+07
Q9BR76;A0A087WW53;F5H390;F5H0D2;A9Z1Z3-3;A9Z1Z3	Q9BR76	Coronin-1B	CORO1B	3.74894e+07	4.26174e+07	3.72912e+07	4.22509e+07	3.65133e+07	3.46458e+07
Q9ULV4;Q9ULV4-2;Q9ULV4-3;B4E3S0;H0YHL7;F8W1H8;F8VUX3;F8VSA4;F8VRE9;F8VTT6;F8VVB7;F8VV53;J3QLV6;J3KSS5;Q6QEF8-4;Q6QEF8-3;Q6QEF8-2;Q6QEF8-5;Q6QEF8	Q9ULV4;Q9ULV4-2;Q9ULV4-3;B4E3S0	Coronin-1C;Coronin	CORO1C	1.07616e+08	1.1754e+08	1.31008e+08	6.45934e+07	6.10537e+07	7.06202e+07
Q14019;H3BT58	Q14019;H3BT58	Coactosin-like protein	COTL1	3.8415e+07	4.32728e+07	4.39662e+07	6.07912e+07	7.06321e+07	7.84577e+07
Q99829;A6PVH9;F2Z2V0;B0QZ18;E7ENH5;Q5JX56;Q5JX58;Q5JX59;Q5JX60;Q5JX44;Q5JX55;Q5JX45;Q5JX54;Q5JX61;Q5JX52;Q5JX57;E7EV27;Q5JX53;H0Y524	Q99829;A6PVH9;F2Z2V0;B0QZ18;E7ENH5;Q5JX56;Q5JX58;Q5JX59;Q5JX60;Q5JX44;Q5JX55;Q5JX45	Copine-1	CPNE1	3.73385e+07	3.77117e+07	3.7637e+07	6.73264e+07	6.1383e+07	5.71092e+07
O75131;A0A087WYQ3;E5RHZ0;A0A087WXR6;A0A087WUS8;H0YB26;E5RFT7;E7ENV7;Q86YQ8-2;Q9HCH3-2;Q96FN4-2;Q96FN4;Q8IYJ1;Q96A23;O95741;Q9UBL6-2;Q86YQ8;Q96A23-2;Q9HCH3;O95741-2;Q9UBL6	O75131;A0A087WYQ3;E5RHZ0	Copine-3	CPNE3	2.4407e+07	3.03404e+07	3.62443e+07	1.83302e+07	1.59521e+07	2.07769e+07
B4DJV2;O75390;A0A0C4DGI3;H0YIC4;F8VPA1;H0YH82;F8VRI6;F8VPF9;F8VR34;F8W1S4;F8W4S1;F8VRP1;F8VX68;F8VTT8;F8VZK9;F8VX07;F8VWQ5;F8VU34;F8W642	B4DJV2;O75390;A0A0C4DGI3	Citrate synthase;Citrate synthase, mitochondrial	CS	6.77028e+07	7.27934e+07	1.4328e+08	6.33008e+07	7.56966e+07	7.64499e+07
P55060;P55060-3;P55060-4;P55060-2	P55060;P55060-3;P55060-4	Exportin-2	CSE1L	2.10703e+08	2.52329e+08	2.0322e+08	1.68102e+08	2.18373e+08	2.14742e+08
P21291;E9PS42;E9PND2;E9PP21	P21291;E9PS42;E9PND2;E9PP21	Cysteine and glycine-rich protein 1	CSRP1	2.39887e+07	2.80338e+07	2.32337e+07	3.77112e+07	3.56408e+07	3.15414e+07
P17812;P17812-2;Q9NRF8	P17812;P17812-2	CTP synthase 1	CTPS1	3.34368e+07	2.62363e+07	3.05027e+07	3.2693e+07	2.88387e+07	2.96613e+07
X6R5C5;X6R8A1;P10619-2;P10619;U3KQ41;U3KQU6	X6R5C5;X6R8A1;P10619-2;P10619	Carboxypeptidase;Lysosomal protective protein;Lysosomal protective protein 32 kDa chain;Lysosomal protective protein 20 kDa chain	CTSA	2.3062e+07	2.1115e+07	2.75083e+07	1.31009e+07	1.47069e+07	1.49006e+07
P07858;E9PKQ7;E9PNL5;E9PHZ5;E9PLY3;E9PSG5;E9PQM1;R4GMQ5;E9PR54;E9PJ67;E9PCB3;E9PS78	P07858	Cathepsin B;Cathepsin B light chain;Cathepsin B heavy chain	CTSB	8.95666e+07	8.83815e+07	8.93644e+07	1.01081e+08	9.18252e+07	9.61992e+07
A0A1B0GW44;A0A1B0GVD5;A0A1B0GWE8;P07339;A0A1B0GV23;A0A1B0GVP3;A0A1B0GU92;A0A1B0GU03;H7C469;C9JH19;H7C1V0;F8WD96;F8W787;A0A1B0GVF1;A0A1B0GV01	A0A1B0GW44;A0A1B0GVD5;A0A1B0GWE8;P07339;A0A1B0GV23;A0A1B0GVP3;A0A1B0GU92;A0A1B0GU03;H7C469;C9JH19	Cathepsin D;Cathepsin D light chain;Cathepsin D heavy chain	CTSD	1.07553e+08	1.1184e+08	1.09433e+08	2.99692e+08	2.92187e+08	3.38238e+08
Q14247-3;Q14247;Q14247-2;H0YCD9;H0YEV2	Q14247-3;Q14247;Q14247-2	Src substrate cortactin	CTTN	2.80214e+08	3.04663e+08	2.40653e+08	2.3834e+08	2.30072e+08	2.15918e+08
P00387-2;P00387;P00387-3;B1AHF3	P00387-2;P00387;P00387-3;B1AHF3	NADH-cytochrome b5 reductase 3;NADH-cytochrome b5 reductase 3 membrane-bound form;NADH-cytochrome b5 reductase 3 soluble form	CYB5R3	7.20468e+07	6.70936e+07	7.20972e+07	6.75029e+07	7.63088e+07	6.72584e+07
C9JFR7;P99999	C9JFR7;P99999	Cytochrome c	CYCS	5.19451e+07	5.02823e+07	6.78734e+07	4.68906e+07	4.45812e+07	4.61116e+07
P14868;P14868-2;H7BZ35;C9J7S3;C9JLC1;H7C278;C9JQM9	P14868;P14868-2	Aspartate--tRNA ligase, cytoplasmic	DARS	6.78579e+07	7.3119e+07	6.79222e+07	4.53828e+07	4.57902e+07	4.78254e+07
K7EQ02;K7EQ55;K7EK33;Q96EP5-2;Q96EP5	K7EQ02;K7EQ55;K7EK33;Q96EP5-2;Q96EP5	DAZ-associated protein 1	DAZAP1	1.99308e+07	2.48145e+07	2.28296e+07	2.33249e+07	2.05901e+07	2.18806e+07
Q16643;Q16643-3;Q16643-2;D6R9W4;D6RFI1;D6R9Q9;D6RCR4	Q16643;Q16643-3;Q16643-2;D6R9W4	Drebrin	DBN1	2.51785e+07	1.40361e+07	1.81105e+07	3.74541e+07	5.10013e+07	3.17958e+07
Q9UJU6;H0Y5J4;Q9UJU6-5;F8WBG8;F8WC20;F8WBB2;F8WFE1	Q9UJU6;H0Y5J4;Q9UJU6-5	Drebrin-like protein	DBNL	3.36695e+07	2.07948e+07	1.7421e+07	4.7115e+07	3.8254e+07	3.95856e+07
Q16531;F5GY55;Q16531-2;F5GWI0;F5GZY8;F5H2L3;F5GYG8;F5H198	Q16531;F5GY55	DNA damage-binding protein 1	DDB1	1.70669e+07	2.01266e+07	1.53579e+07	1.29519e+07	1.28794e+07	1.2006e+07
A0A0C4DGS1;P39656;P39656-2;P39656-3;U3KQ84	A0A0C4DGS1;P39656;P39656-2;P39656-3	Dolichyl-diphosphooligosaccharide--protein glycosyltransferase 48 kDa subunit	DDOST	1.05928e+08	1.19472e+08	1.2633e+08	1.04862e+08	9.75989e+07	1.09651e+08
P30046;J3KQ18;B5MC82;P30046-2;A6NHG4;H7C342	P30046;J3KQ18;B5MC82;P30046-2;A6NHG4	D-dopachrome decarboxylase;D-dopachrome decarboxylase-like protein	DDT;DDTL	1.70701e+07	1.28833e+07	1.42728e+07	2.21181e+07	2.01193e+07	2.24958e+07
A0A1X7SBZ2;A0A1W2PQ51;Q92841-1;Q92841-3;Q92841-2;Q92841;A0A0U1RQJ0	A0A1X7SBZ2;A0A1W2PQ51;Q92841-1;Q92841-3;Q92841-2;Q92841	Probable ATP-dependent RNA helicase DDX17	DDX17	4.33367e+07	3.79465e+07	4.38973e+07	5.91437e+07	5.80233e+07	5.46626e+07
Q13838;Q13838-2;Q5STU3;F6WLT2;A0A0G2JJZ9;A0A140T9X3;F6S4E6;A0A0A0MT12;F6TRA5;A0A140T9X9;A0A140T996;F6UJC5;A0A140TA18;A0A140T9L4;A0A140T973;A0A140T9K1;F6R6M7;H0Y400;F6QYI9;A0A0G2JJL7;A0A0G2JHN7;F6U6E2;F6S2B7;H0YCC6;F6SXL5;A0A140T9K2;A0A140T9N3	Q13838;Q13838-2;Q5STU3;F6WLT2;A0A0G2JJZ9;A0A140T9X3;F6S4E6;A0A0A0MT12;F6TRA5;A0A140T9X9;A0A140T996;F6UJC5;A0A140TA18	Spliceosome RNA helicase DDX39B	DDX39B	9.72777e+07	1.06695e+08	1.01814e+08	1.41221e+08	1.3059e+08	1.48499e+08
A0A0D9SFB3;A0A0D9SG12;A0A0D9SF53;O00571-2;O00571;O15523-2;O15523;A0A0J9YVQ7;C9J081;O15523-3;C9J8G5;A0A087WVZ1;A0A0J9YYH6;H0Y960;D6RCM4;Q9NQI0-3;Q9NQI0-2;Q9NQI0-4;Q9NQI0	A0A0D9SFB3;A0A0D9SG12;A0A0D9SF53;O00571-2;O00571;O15523-2;O15523	ATP-dependent RNA helicase DDX3X;ATP-dependent RNA helicase DDX3Y	DDX3X;DDX3Y	3.66372e+07	3.63252e+07	8.07748e+07	3.06496e+07	3.07344e+07	2.18371e+07
J3KTA4;P17844;P17844-2;J3QRQ7;J3KRZ1;J3QSF1;J3KRX8;J3QR02;J3QRN5;J3QLG9;J3QR62;X6RLV5	J3KTA4;P17844;P17844-2	Probable ATP-dependent RNA helicase DDX5	DDX5	3.85534e+07	3.40303e+07	4.18915e+07	3.65696e+07	5.25252e+07	4.57163e+07
O43143	O43143	Pre-mRNA-splicing factor ATP-dependent RNA helicase DHX15	DHX15	1.44421e+07	2.30181e+07	1.6774e+07	1.87934e+07	1.54679e+07	1.40199e+07
Q08211;Q08211-2	Q08211	ATP-dependent RNA helicase A	DHX9	8.30904e+07	8.45005e+07	8.89571e+07	8.27777e+07	9.18686e+07	8.36611e+07
P09622;E9PEX6;P09622-2;P09622-3;F8WDM5;A0A1W2PR83;F2Z2E3	P09622;E9PEX6;P09622-2;P09622-3	Dihydrolipoyl dehydrogenase, mitochondrial;Dihydrolipoyl dehydrogenase	DLD	2.14707e+07	2.19497e+07	1.68737e+07	1.25765e+07	1.17571e+07	1.66712e+07
P31689;P31689-2	P31689;P31689-2	DnaJ homolog subfamily A member 1	DNAJA1	2.16259e+07	2.64017e+07	1.71293e+07	1.61899e+07	1.85881e+07	2.00411e+07
P50570-3;P50570-4;P50570-2;P50570-5;P50570;K7EMQ3;E5RHK8;Q9UQ16-5;Q9UQ16-2;Q9UQ16-3;Q9UQ16;Q9UQ16-4;E5RIK2;H7C5U0	P50570-3;P50570-4;P50570-2;P50570-5;P50570	Dynamin-2	DNM2	1.39242e+07	1.13975e+07	1.31984e+07	1.39935e+07	1.32459e+07	1.39986e+07
A0A1C7CYX9;Q16555;Q16555-2;E5RFU4	A0A1C7CYX9;Q16555;Q16555-2	Dihydropyrimidinase-related protein 2	DPYSL2	2.4387e+08	2.37023e+08	2.52554e+08	2.31056e+08	2.33551e+08	2.33137e+08
Q14195-2;Q14195;H0YBT4;D6RF19;H0YB87	Q14195-2;Q14195	Dihydropyrimidinase-related protein 3	DPYSL3	6.82688e+07	5.65617e+07	6.07413e+07	1.19736e+08	1.26398e+08	1.23526e+08
P60981;P60981-2;F6RFD5	P60981;P60981-2;F6RFD5	Destrin	DSTN	4.9402e+07	2.5313e+07	3.9158e+07	2.13672e+08	2.0206e+08	2.11063e+08
P33316-2;A0A0C4DGL3;H0YNW5;H0YKC5;P33316;H0YNJ9;H0YMM5;H0YKI0;H0YMP1	P33316-2;A0A0C4DGL3;H0YNW5;H0YKC5;P33316;H0YNJ9;H0YMM5;H0YKI0;H0YMP1	Deoxyuridine 5-triphosphate nucleotidohydrolase, mitochondrial	DUT	6.78422e+07	4.7015e+07	4.51913e+07	5.85693e+07	5.24313e+07	4.33984e+07
Q14204;H0YJ21	Q14204	Cytoplasmic dynein 1 heavy chain 1	DYNC1H1	2.86996e+08	3.10491e+08	3.60756e+08	1.85047e+08	1.90775e+08	2.14195e+08
Q13409-6;Q13409-3;Q13409-7;Q13409-2;Q13409-5;Q13409;E7EV09;E7EQL5;E7EQU2;E7ESD3;E7EMU4;E9PGG1;E7EUM4;E7ERR6;E7ERH4;E7ET01;E7ETL8;E7EU01	Q13409-6;Q13409-3;Q13409-7;Q13409-2;Q13409-5;Q13409;E7EV09;E7EQL5	Cytoplasmic dynein 1 intermediate chain 2	DYNC1I2	2.86284e+07	2.89645e+07	3.57914e+07	1.93055e+07	1.41091e+07	1.98425e+07
P30084	P30084	Enoyl-CoA hydratase, mitochondrial	ECHS1	2.32067e+07	3.00874e+07	4.64292e+07	2.93908e+07	3.84306e+07	2.80762e+07
P68104;Q5VTE0;A0A087WVQ9;P68104-2;A0A087WV01;Q5JR01;A6PW80	P68104;Q5VTE0;A0A087WVQ9;P68104-2;A0A087WV01	Elongation factor 1-alpha 1;Putative elongation factor 1-alpha-like 3;Elongation factor 1-alpha	EEF1A1;EEF1A1P5	2.64207e+09	2.49117e+09	2.67064e+09	2.80074e+09	2.91629e+09	2.94617e+09
P24534;C9JZW3;F2Z2G2;F8WF65	P24534	Elongation factor 1-beta	EEF1B2	2.01981e+08	1.86301e+08	1.95817e+08	1.25663e+08	1.27761e+08	1.25898e+08
P29692;E9PRY8;P29692-2;E9PQZ1;E9PK01;P29692-4;A0A087X1X7;H0YE72;E9PPR1;E9PL12;E9PQ49;E9PI39;E9PMW7;H0YE58;E9PIZ1;H0YCK7;E9PKK3;E9PK72;E9PNW6;E9PQC9;E9PJD0	P29692;E9PRY8;P29692-2;E9PQZ1;E9PK01;P29692-4;A0A087X1X7;H0YE72;E9PPR1;E9PL12;E9PQ49;E9PI39	Elongation factor 1-delta	EEF1D	1.16201e+08	1.10325e+08	1.10632e+08	1.13941e+08	1.11241e+08	1.08739e+08
Q96C19;H0Y4Y4;A0A087X1Z2;Q9BUP0-2;Q9BUP0;C9JTV4;Q8WYH2	Q96C19;H0Y4Y4	EF-hand domain-containing protein D2	EFHD2	1.60145e+07	1.46637e+07	1.45412e+07	1.02924e+07	9.7285e+06	9.52475e+06
Q9NZN4;Q9NZN4-2	Q9NZN4;Q9NZN4-2	EH domain-containing protein 2	EHD2	2.88013e+07	1.52828e+07	3.28447e+07	5.40857e+07	5.66273e+07	7.67297e+07
P05198;H0YJS4;G3V4T5	P05198;H0YJS4;G3V4T5	Eukaryotic translation initiation factor 2 subunit 1	EIF2S1	3.87096e+07	4.47106e+07	4.58553e+07	2.56447e+07	2.83927e+07	2.941e+07
P20042	P20042	Eukaryotic translation initiation factor 2 subunit 2	EIF2S2	2.66702e+07	2.3317e+07	2.22981e+07	2.6772e+07	2.58321e+07	2.33553e+07
P41091;Q2VIR3;F8W810;Q2VIR3-2;H7BZU1	P41091;Q2VIR3;F8W810;Q2VIR3-2	Eukaryotic translation initiation factor 2 subunit 3;Putative eukaryotic translation initiation factor 2 subunit 3-like protein	EIF2S3;EIF2S3L	4.4756e+07	4.55282e+07	4.12328e+07	4.24437e+07	3.62799e+07	4.35809e+07
Q14152;Q14152-2	Q14152;Q14152-2	Eukaryotic translation initiation factor 3 subunit A	EIF3A	4.09697e+07	4.87218e+07	4.05624e+07	3.74786e+07	4.14806e+07	3.5785e+07
P55884;P55884-2;C9JZG1;C9JQN7	P55884;P55884-2	Eukaryotic translation initiation factor 3 subunit B	EIF3B	7.39819e+07	8.22899e+07	6.84558e+07	7.14529e+07	6.10382e+07	7.74523e+07
O00303;H0YDT6;E9PQV8;A0A1W2PP79	O00303	Eukaryotic translation initiation factor 3 subunit F	EIF3F	5.28728e+07	6.60422e+07	5.34426e+07	4.01391e+07	4.31863e+07	3.64113e+07
O75821;K7ENA8;K7EL20;K7ER90;K7EP16;K7EL60	O75821;K7ENA8;K7EL20;K7ER90	Eukaryotic translation initiation factor 3 subunit G	EIF3G	1.55826e+07	1.49071e+07	1.6617e+07	1.41884e+07	1.72933e+07	2.0559e+07
Q13347;Q5TFK1	Q13347	Eukaryotic translation initiation factor 3 subunit I	EIF3I	3.08077e+07	3.85261e+07	3.56927e+07	2.73872e+07	2.83173e+07	3.10113e+07
B0QY89;Q9Y262-2;Q9Y262;B0QY90;C9JHP4;C9K0Q7;H7C3A0;H0Y7E6	B0QY89;Q9Y262-2;Q9Y262;B0QY90	Eukaryotic translation initiation factor 3 subunit L	EIF3L	1.19e+07	1.44577e+07	1.48796e+07	1.19512e+07	1.2932e+07	1.26851e+07
Q7L2H7;J3KNJ2;Q7L2H7-2;H0YCQ8;E9PN86;E9PRY0;E7ESM3;E9PRI2	Q7L2H7;J3KNJ2;Q7L2H7-2;H0YCQ8	Eukaryotic translation initiation factor 3 subunit M	EIF3M	1.22124e+07	1.96687e+07	1.70837e+07	1.42577e+07	1.36868e+07	1.73837e+07
P60842;J3KT12;P60842-2;J3QS69;J3KTB5;J3QL43;J3QR64;J3QLN6;J3KS25;J3KSZ0;J3QKZ9;J3KTN0;J3KT04;J3KS93;J3QQP0;J3KSN7;J3QL52	P60842;J3KT12;P60842-2;J3QS69;J3KTB5;J3QL43;J3QR64	Eukaryotic initiation factor 4A-I	EIF4A1	2.75015e+08	2.93776e+08	2.70851e+08	2.55713e+08	2.41863e+08	2.61961e+08
Q14240;Q14240-2;E7EQG2;E7EMV8;E9PBH4;F8WE11;C9JUF0	Q14240;Q14240-2;E7EQG2	Eukaryotic initiation factor 4A-II;Eukaryotic initiation factor 4A-II, N-terminally processed	EIF4A2	2.43766e+07	1.73866e+07	1.87352e+07	3.38356e+07	3.39382e+07	3.1437e+07
P38919;I3L3H2	P38919	Eukaryotic initiation factor 4A-III;Eukaryotic initiation factor 4A-III, N-terminally processed	EIF4A3	2.51428e+07	1.9278e+07	1.96527e+07	2.23211e+07	2.07904e+07	2.16333e+07
E7EX17;P23588-2;P23588;F8W0K0;F8VSC7;F8VP89;F8VRU1;F8VYE9;F8VX11	E7EX17;P23588-2;P23588;F8W0K0;F8VSC7;F8VP89	Eukaryotic translation initiation factor 4B	EIF4B	1.824e+07	1.61122e+07	1.58236e+07	1.00423e+07	1.66779e+07	1.5604e+07
E7EX73;E9PGM1;E7EUU4;Q04637-5;Q04637-4;Q04637-3;Q04637;Q04637-8;Q04637-9;Q04637-6;Q04637-7;C9JF13;C9J6B6;C9J2Z7;C9K073;H7C044;H7C0V6;A0A0A0MSA7;A0A0U1RQK7;O43432-4;O43432;O43432-3;F8WCF2;C9JHW9	E7EX73;E9PGM1;E7EUU4;Q04637-5;Q04637-4;Q04637-3;Q04637;Q04637-8;Q04637-9;Q04637-6;Q04637-7;C9JF13	Eukaryotic translation initiation factor 4 gamma 1	EIF4G1	6.68799e+07	6.92572e+07	5.79304e+07	6.01944e+07	5.61906e+07	5.71416e+07
Q15056-2;Q15056	Q15056-2;Q15056	Eukaryotic translation initiation factor 4H	EIF4H	4.43409e+07	4.19919e+07	4.10419e+07	3.4009e+07	3.11443e+07	3.63708e+07
P63241;I3L397;I3L504;P63241-2;Q6IS14;F8WCJ1;C9J7B5;C9J4W5;Q9GZV4	P63241;I3L397;I3L504;P63241-2;Q6IS14	Eukaryotic translation initiation factor 5A-1;Eukaryotic translation initiation factor 5A;Eukaryotic translation initiation factor 5A-1-like	EIF5A;EIF5AL1	2.70842e+08	2.79943e+08	3.05101e+08	2.25771e+08	2.39694e+08	2.21614e+08
P56537;P56537-2;B7ZBH1;A0A0U1RQV5	P56537	Eukaryotic translation initiation factor 6	EIF6	4.01143e+07	3.71001e+07	3.3199e+07	3.17055e+07	4.35466e+07	4.83535e+07
P50402;Q5HY57;F8WEQ1	P50402;Q5HY57	Emerin	EMD	1.67734e+07	1.45644e+07	1.54163e+07	2.12203e+07	1.86459e+07	1.8454e+07
P09104;P09104-2;F5H0C8;F5H1C3;P13929-3;P13929-2;P13929;U3KQP4;U3KQQ1	P09104;P09104-2;F5H0C8	Gamma-enolase;Enolase	ENO2	2.57676e+08	2.07766e+08	2.82816e+08	4.02565e+07	2.90338e+07	2.85819e+07
P07814;V9GYZ6;V9GZ76	P07814;V9GYZ6	Bifunctional glutamate/proline--tRNA ligase;Glutamate--tRNA ligase;Proline--tRNA ligase	EPRS	4.15033e+07	4.74292e+07	4.30042e+07	5.88601e+07	5.80956e+07	5.50072e+07
P84090;G3V279	P84090;G3V279	Enhancer of rudimentary homolog	ERH	1.26023e+07	1.06545e+07	8.58386e+06	2.21323e+07	1.95545e+07	1.28766e+07
Q96HE7;G3V2H0;G3V3E6;G3V5B3;G3V503;Q5TAE8;Q86YB8	Q96HE7	ERO1-like protein alpha	ERO1L	1.52576e+08	1.51035e+08	1.80383e+08	1.90739e+07	1.05552e+07	1.06256e+07
P30040;F8VY02;F8W1G0;P30040-2	P30040;F8VY02	Endoplasmic reticulum resident protein 29	ERP29	2.26941e+07	2.0181e+07	2.6158e+07	3.63992e+07	3.07344e+07	3.43539e+07
Q9BS26	Q9BS26	Endoplasmic reticulum resident protein 44	ERP44	5.40825e+07	3.20823e+07	3.84718e+07	5.23015e+07	4.52244e+07	3.65289e+07
P10768;X6RA14;H7BZT7;U3KQT1	P10768;X6RA14;H7BZT7	S-formylglutathione hydrolase	ESD	7.03371e+07	7.0822e+07	8.05849e+07	5.93997e+07	5.84507e+07	6.40172e+07
B7Z7P8;P62495-2;P62495;I3L492;D6RCB3;D6RJE8	B7Z7P8;P62495-2;P62495	Eukaryotic peptide chain release factor subunit 1	ETF1	1.18528e+07	1.17156e+07	1.23519e+07	1.28244e+07	9.19377e+06	1.18013e+07
P13804-2;P13804;H0YK49;H0YLU7;H0YL12;H0YNX6;H0YKF0;H0YL83	P13804-2;P13804;H0YK49;H0YLU7;H0YL12;H0YNX6;H0YKF0	Electron transfer flavoprotein subunit alpha, mitochondrial	ETFA	1.12941e+07	2.44207e+07	1.66022e+07	3.64033e+07	3.78028e+07	3.36799e+07
Q96CS3;D6RBG6	Q96CS3	FAS-associated factor 2	FAF2	1.55165e+07	1.28887e+07	2.52087e+07	1.6853e+07	2.2811e+07	1.80344e+07
Q96TA1-2;Q96TA1	Q96TA1-2;Q96TA1	Niban-like protein 1	FAM129B	1.33288e+08	1.30178e+08	1.6232e+08	5.02061e+07	5.93573e+07	6.49669e+07
Q9Y285;K7ER00;Q9Y285-2;K7ER16;K7EPH2;K7EK06;K7ERS0	Q9Y285;K7ER00;Q9Y285-2;K7ER16;K7EPH2	Phenylalanine--tRNA ligase alpha subunit	FARSA	2.5407e+07	2.33191e+07	2.72803e+07	1.39517e+07	2.37247e+07	2.4011e+07
P49327;A0A0U1RQF0;A0A0U1RRG3;A0A1B0GTR5	P49327;A0A0U1RQF0	Fatty acid synthase;[Acyl-carrier-protein] S-acetyltransferase;[Acyl-carrier-protein] S-malonyltransferase;3-oxoacyl-[acyl-carrier-protein] synthase;3-oxoacyl-[acyl-carrier-protein] reductase;3-hydroxyacyl-[acyl-carrier-protein] dehydratase;Enoyl-[acyl-carrier-protein] reductase;Oleoyl-[acyl-carrier-protein] hydrolase	FASN	2.82049e+07	3.34507e+07	3.62316e+07	2.55611e+08	3.10524e+08	3.3689e+08
P07954-2;P07954	P07954-2;P07954	Fumarate hydratase, mitochondrial	FH	1.09062e+08	6.95507e+07	4.82939e+07	1.18818e+08	1.4805e+08	1.09317e+08
Q96AY3;H0Y827;Q96AY3-2;K7ESG6;K7ELI6;K7EM43;C9JPC3	Q96AY3	Peptidyl-prolyl cis-trans isomerase FKBP10	FKBP10	4.70182e+07	5.09024e+07	5.36473e+07	3.30899e+07	3.26238e+07	3.56076e+07
P62942;Q5W0X3;A0A087WZM5;Q1JUQ3;Q1JUQ5;A0A087WTS4;A0A087WV48	P62942;Q5W0X3;A0A087WZM5	Peptidyl-prolyl cis-trans isomerase FKBP1A;Peptidyl-prolyl cis-trans isomerase	FKBP1A	2.61544e+07	2.59097e+07	1.8469e+07	5.25871e+07	5.68287e+07	5.5295e+07
Q00688;G3V5F2	Q00688	Peptidyl-prolyl cis-trans isomerase FKBP3	FKBP3	2.11101e+07	2.05194e+07	1.65735e+07	1.68316e+07	1.15877e+07	1.463e+07
Q02790;F5H1U3;H0YFG2;F5H120	Q02790	Peptidyl-prolyl cis-trans isomerase FKBP4;Peptidyl-prolyl cis-trans isomerase FKBP4, N-terminally processed	FKBP4	1.61487e+08	1.64302e+08	1.51766e+08	1.54258e+08	1.37973e+08	1.41364e+08
P21333-2;P21333;Q5HY54;Q60FE5;A0A087WWY3;F8WE98;H0Y5C6;H0Y5F3;H7C2E7	P21333-2;P21333;Q5HY54;Q60FE5;A0A087WWY3	Filamin-A	FLNA	2.9186e+09	2.73368e+09	2.83951e+09	3.9422e+09	4.03211e+09	3.969e+09
O75369-2;O75369-9;O75369;O75369-8;O75369-6;O75369-3;E7EN95;O75369-7;O75369-5;O75369-4;H7C5L4;A0A0A0MT44;A0A0C4DGA1	O75369-2;O75369-9;O75369;O75369-8;O75369-6;O75369-3;E7EN95;O75369-7;O75369-5;O75369-4	Filamin-B	FLNB	5.09807e+08	4.99162e+08	5.25982e+08	4.86687e+08	4.95589e+08	4.69528e+08
Q16658;C9JFC0;A0A0A0MSB2;C9JPH9	Q16658	Fascin	FSCN1	1.36957e+08	1.56713e+08	1.35887e+08	5.65219e+07	5.77249e+07	5.95426e+07
P02794;G3V192;G3V1D1;E9PRK8;E9PKY7;E9PPQ4;E9PQR3;E9PKM5;E9PK45	P02794;G3V192;G3V1D1	Ferritin heavy chain;Ferritin heavy chain, N-terminally processed;Ferritin	FTH1	1.77861e+08	1.53031e+08	1.57133e+08	1.52167e+08	1.48411e+08	1.33621e+08
Q96AE4-2;E9PEB5;Q96AE4;C9JSZ1	Q96AE4-2;E9PEB5;Q96AE4	Far upstream element-binding protein 1	FUBP1	2.63347e+07	9.0196e+06	1.43397e+07	7.51173e+07	6.99569e+07	6.05277e+07
P35637-2;P35637;H3BPE7	P35637-2;P35637;H3BPE7	RNA-binding protein FUS	FUS	5.71225e+07	5.79984e+07	5.46093e+07	4.89503e+07	5.10199e+07	5.74548e+07
B4DXZ6;P51114-2;P51114;E7EU85;E9PFF5;P51114-3;C9JAJ4;C9JZE0;C9JY20;H7C4S4;R9WNI0;A8MQB8;G3V0J0;Q06787-8;Q06787-6;Q06787-2;Q06787-4;Q06787-5;Q06787-9;Q06787-7;Q06787-3;Q06787	B4DXZ6;P51114-2;P51114;E7EU85;E9PFF5;P51114-3	Fragile X mental retardation syndrome-related protein 1	FXR1	1.64516e+07	1.65637e+07	1.19181e+07	1.67918e+07	1.32036e+07	1.78763e+07
Q13283;E5RIF8;E5RH42;E5RIZ6;E5RJU8;Q13283-2;E5RH00;E5RI46	Q13283	Ras GTPase-activating protein-binding protein 1	G3BP1	1.60784e+07	1.12417e+07	9.42405e+06	2.41451e+07	3.21024e+07	2.13627e+07
P11413;P11413-3;P11413-2;E7EUI8;E7EM57;E9PD92	P11413;P11413-3;P11413-2;E7EUI8;E7EM57	Glucose-6-phosphate 1-dehydrogenase	G6PD	1.63898e+08	1.2672e+08	1.21684e+08	5.77348e+08	5.71632e+08	6.08216e+08
P04406;P04406-2;E7EUT5;O14556	P04406;P04406-2;E7EUT5	Glyceraldehyde-3-phosphate dehydrogenase	GAPDH	6.61566e+09	7.57746e+09	8.05234e+09	4.24825e+09	4.48207e+09	4.66163e+09
P41250;H7C443	P41250	Glycine--tRNA ligase	GARS	8.08146e+07	8.08799e+07	8.35666e+07	9.27844e+07	9.68824e+07	1.04513e+08
P22102;P22102-2;F8WD69;C9JBJ1;C9JTV6;C9JZG2;C9JKQ7;H7C366;A0A140TA71	P22102;P22102-2	Trifunctional purine biosynthetic protein adenosine-3;Phosphoribosylamine--glycine ligase;Phosphoribosylformylglycinamidine cyclo-ligase;Phosphoribosylglycinamide formyltransferase	GART	3.1792e+07	4.11359e+07	4.87755e+07	3.28369e+07	3.35696e+07	3.99647e+07
Q04446;E9PGM4	Q04446;E9PGM4	1,4-alpha-glucan-branching enzyme	GBE1	1.10236e+08	1.29548e+08	1.23265e+08	9.94236e+07	1.00217e+08	9.97059e+07
P31150;G5E9U5	P31150	Rab GDP dissociation inhibitor alpha	GDI1	4.24834e+07	4.14006e+07	4.7527e+07	3.33459e+07	3.08479e+07	3.21353e+07
P50395;P50395-2;Q5SX87;Q5SX86;V9GYF8;Q5SX90;V9GYJ7	P50395;P50395-2	Rab GDP dissociation inhibitor beta	GDI2	2.75287e+08	2.82835e+08	2.78753e+08	2.1608e+08	2.21017e+08	2.5883e+08
O94808;E5RJP4	O94808	Glutamine--fructose-6-phosphate aminotransferase [isomerizing] 2	GFPT2	7.9543e+07	3.39716e+07	7.31759e+07	5.10681e+06	6.64206e+06	5.73727e+06
O76003	O76003	Glutaredoxin-3	GLRX3	4.15043e+07	5.22143e+07	3.7428e+07	4.15327e+07	4.07269e+07	3.92917e+07
P04899;P04899-4;P04899-6;P04899-3;P04899-5;P04899-2;P63096;P63096-2;A0A1W2PRE1;A2A2R6;A0A1W2PQK2;A0A087WTB6;Q5JWD1;H0Y7E8;A0A1W2PRJ7;A0A087WZE5;C9JPP4;A0A1W2PS82;A0A1W2PP38;P11488;P19087;A8MTJ3;P38405;P38405-2	P04899;P04899-4;P04899-6;P04899-3;P04899-5;P04899-2	Guanine nucleotide-binding protein G(i) subunit alpha-2	GNAI2	4.27035e+07	4.72264e+07	4.02781e+07	3.40937e+07	3.07798e+07	3.68724e+07
P62879;C9JIS1;C9JXA5;E7EP32;C9JZN1;P62879-2;B1AKQ8;C9JD14	P62879;C9JIS1;C9JXA5;E7EP32;C9JZN1	Guanine nucleotide-binding protein G(I)/G(S)/G(T) subunit beta-2	GNB2	2.91735e+07	3.43302e+07	3.23006e+07	3.32847e+07	3.04917e+07	2.84644e+07
P63244;J3KPE3;D6RAC2;H0YAF8;H0Y8W2;D6REE5;D6RHH4;H0YAM7;D6R9Z1;D6R9L0;D6RFX4;D6RFZ9;D6RF23;D6RAU2;E9PD14;D6RBD0;H0Y8R5;H0Y9P0;D6RHJ5;D6R909;D6RGK8;D6RDI0	P63244;J3KPE3;D6RAC2;H0YAF8;H0Y8W2;D6REE5;D6RHH4;H0YAM7;D6R9Z1;D6R9L0;D6RFX4	Guanine nucleotide-binding protein subunit beta-2-like 1;Guanine nucleotide-binding protein subunit beta-2-like 1, N-terminally processed	GNB2L1	1.71602e+08	1.75638e+08	1.74868e+08	1.78334e+08	1.64064e+08	1.8382e+08
P00505;P00505-2	P00505;P00505-2	Aspartate aminotransferase, mitochondrial	GOT2	2.92416e+07	2.81597e+07	3.0263e+07	5.3896e+07	4.49653e+07	4.94035e+07
A0A0A0MTS2;P06744;P06744-2;K7EQ48;A0A0J9YXP8;A0A0J9YYH3;A0A0J9YX90;K7EPY4;K7EP41;K7ELR7;K7ENA0;K7ERC6;K7ERK8;K7EIL4;K7ESF4;Q8N196	A0A0A0MTS2;P06744;P06744-2;K7EQ48;A0A0J9YXP8;A0A0J9YYH3	Glucose-6-phosphate isomerase	GPI	4.10462e+08	3.76498e+08	3.86436e+08	6.96319e+08	7.00178e+08	6.78118e+08
P06396-2;A0A0A0MS51;A0A0A0MT01;P06396-4;P06396-3;P06396;Q5T0I0;A0A0U1RQL8;REV__H0YJM7;REV__Q6TDU7-4;REV__Q6TDU7-2;REV__Q6TDU7-3;REV__Q6TDU7;REV__F8W8F9	P06396-2;A0A0A0MS51;A0A0A0MT01;P06396-4;P06396-3;P06396	Gelsolin	GSN	1.37733e+08	1.28598e+08	1.4276e+08	1.85424e+08	1.8778e+08	1.91158e+08
P15170-2;P15170-3;P15170;H3BR35;Q8IYD1;H3BSV8	P15170-2;P15170-3;P15170;H3BR35;Q8IYD1	Eukaryotic peptide chain release factor GTP-binding subunit ERF3A;Eukaryotic peptide chain release factor GTP-binding subunit ERF3B	GSPT1;GSPT2	2.51177e+07	2.83219e+07	3.43371e+07	2.3888e+07	2.36989e+07	2.14651e+07
P78417;Q5TA02;P78417-3;P78417-2;Q5TA01	P78417;Q5TA02;P78417-3;P78417-2;Q5TA01	Glutathione S-transferase omega-1	GSTO1	1.36936e+08	1.28951e+08	1.19064e+08	5.41765e+07	4.82001e+07	4.74717e+07
P09211;A8MX94;A0A087X2E9;A0A087X243	P09211;A8MX94	Glutathione S-transferase P	GSTP1	3.025e+08	3.18059e+08	3.09238e+08	5.29279e+08	5.83898e+08	5.39886e+08
Q71UI9;P0C0S5;C9J0D1;Q71UI9-4;Q71UI9-2;Q71UI9-3;C9J386	Q71UI9;P0C0S5;C9J0D1;Q71UI9-4;Q71UI9-2;Q71UI9-3	Histone H2A.V;Histone H2A.Z;Histone H2A	H2AFV;H2AFZ	6.50097e+08	5.99197e+08	6.21149e+08	8.69205e+08	9.00101e+08	9.76627e+08
O75367-2;O75367-3;O75367;B4DJC3;D6RCF2;Q9P0M6;Q5SQT3	O75367-2;O75367-3;O75367;B4DJC3	Core histone macro-H2A.1;Histone H2A	H2AFY	2.93674e+07	3.24709e+07	3.45631e+07	6.09351e+07	7.29222e+07	7.32777e+07
P40939;H0YFD6	P40939	Trifunctional enzyme subunit alpha, mitochondrial;Long-chain enoyl-CoA hydratase;Long chain 3-hydroxyacyl-CoA dehydrogenase	HADHA	7.1204e+07	7.44308e+07	8.46135e+07	7.04246e+07	7.82819e+07	7.95513e+07
P55084-2;P55084;F5GZQ3;B5MD38;C9JEY0;C9JE81;C9K0M0	P55084-2;P55084;F5GZQ3;B5MD38	Trifunctional enzyme subunit beta, mitochondrial;3-ketoacyl-CoA thiolase	HADHB	2.12024e+07	2.01565e+07	2.3711e+07	2.27179e+07	2.20335e+07	2.00431e+07
P12081;B4DDD8;B3KWE1;P12081-2;P12081-4;B4E1C5;P12081-3;E7ETE2;D6RF05;B4DQ67;P49590-2;P49590	P12081;B4DDD8;B3KWE1;P12081-2;P12081-4;B4E1C5;P12081-3;E7ETE2	Histidine--tRNA ligase, cytoplasmic	HARS	2.10053e+07	1.2673e+07	3.09089e+07	1.83322e+07	2.33861e+07	2.69644e+07
P51858;P51858-2;P51858-3;H3BPQ6	P51858;P51858-2;P51858-3	Hepatoma-derived growth factor	HDGF	5.37544e+07	5.72843e+07	5.20594e+07	5.85316e+07	5.84559e+07	6.5649e+07
A0A024R4E5;Q00341;Q00341-2;H0Y394;H7C0A4;C9JIZ1;C9J5E5;C9JZI8;H7BZC3;H7C2D1;C9JT62;C9JHS7;C9JK79;C9JHZ8;C9JES8;C9JBS3;C9JEJ8;C9JHN6;C9JMQ6;C9JQ82;C9JHS9;C9J739;H7C3D0	A0A024R4E5;Q00341;Q00341-2;H0Y394	Vigilin	HDLBP	7.69517e+07	7.57469e+07	7.80817e+07	7.64425e+07	7.15366e+07	7.50827e+07
P49773;D6REP8;D6RE99;D6RD60;D6RC06	P49773	Histidine triad nucleotide-binding protein 1	HINT1	8.42896e+07	8.27478e+07	6.17394e+07	7.8341e+07	9.47286e+07	8.2305e+07
P16401	P16401	Histone H1.5	HIST1H1B	2.3018e+07	2.04906e+07	1.86928e+07	4.03717e+07	3.98111e+07	5.03997e+07
P16403	P16403	Histone H1.2	HIST1H1C	4.59291e+07	4.01389e+07	4.19763e+07	8.55892e+07	1.02845e+08	1.11293e+08
A0A0U1RR32;A0A0U1RRH7;Q99878;Q96KK5;Q9BTM1;Q93077;Q7L7L0;P20671;P0C0S8;P04908;H0YFX9;Q9BTM1-2;Q71UI9-5	A0A0U1RR32;A0A0U1RRH7;Q99878;Q96KK5;Q9BTM1;Q93077;Q7L7L0;P20671;P0C0S8;P04908;H0YFX9;Q9BTM1-2	Histone H2A type 1-J;Histone H2A type 1-H;Histone H2A.J;Histone H2A type 1-C;Histone H2A type 3;Histone H2A type 1-D;Histone H2A type 1;Histone H2A type 1-B/E;Histone H2A	HIST1H2AJ;HIST1H2AH;H2AFJ;HIST1H2AC;HIST3H2A;HIST1H2AD;HIST1H2AG;HIST1H2AB	5.50438e+08	5.96123e+08	6.81344e+08	1.04821e+09	1.10219e+09	1.93661e+09
U3KQK0;Q99880;Q99879;Q99877;Q93079;Q5QNW6;P62807;P58876;P57053;O60814;Q5QNW6-2;Q96A08	U3KQK0;Q99880;Q99879;Q99877;Q93079;Q5QNW6;P62807;P58876;P57053;O60814;Q5QNW6-2;Q96A08	Histone H2B;Histone H2B type 1-L;Histone H2B type 1-M;Histone H2B type 1-N;Histone H2B type 1-H;Histone H2B type 2-F;Histone H2B type 1-C/E/F/G/I;Histone H2B type 1-D;Histone H2B type F-S;Histone H2B type 1-K;Histone H2B type 1-A	HIST1H2BN;HIST1H2BL;HIST1H2BM;HIST1H2BH;HIST2H2BF;HIST1H2BC;HIST1H2BD;H2BFS;HIST1H2BK;HIST1H2BA	1.88155e+09	1.63939e+09	1.47555e+09	3.45619e+09	3.11918e+09	3.09181e+09
P68431	P68431	Histone H3.1	HIST1H3A	1.25415e+09	1.18533e+09	1.09666e+09	2.30352e+09	2.32405e+09	2.60918e+09
P62805	P62805	Histone H4	HIST1H4A	1.86865e+09	1.65743e+09	1.62256e+09	3.39825e+09	3.39454e+09	3.48171e+09
Q16778;P33778;P23527;P06899;Q8N257;Q6DRA6;Q6DN03	Q16778;P33778;P23527;P06899;Q8N257	Histone H2B type 2-E;Histone H2B type 1-B;Histone H2B type 1-O;Histone H2B type 1-J;Histone H2B type 3-B	HIST2H2BE;HIST1H2BB;HIST1H2BO;HIST1H2BJ;HIST3H2BB	5.97359e+07	4.05456e+07	4.69829e+07	9.33312e+07	7.56274e+07	8.90691e+07
Q5TEC6	Q5TEC6	Histone H3	HIST2H3PS2	6.09959e+07	4.05915e+07	4.51022e+07	5.60281e+07	6.61965e+07	6.0472e+07
P19367-4;P19367-2;P19367;P19367-3;B1AR63;B1AR62;B1AR61;Q2TB90;Q2TB90-3;Q2TB90-2	P19367-4;P19367-2;P19367;P19367-3	Hexokinase-1	HK1	1.44494e+08	1.55155e+08	1.42357e+08	6.95136e+07	5.89608e+07	5.59457e+07
P10319;P18465;A0A140T9G0;A0A1W2PP29;A0A1W2PQZ3;A0A1W2PQE2	P10319;P18465;A0A140T9G0	HLA class I histocompatibility antigen, B-58 alpha chain;HLA class I histocompatibility antigen, B-57 alpha chain	HLA-B	7.55753e+07	6.98976e+07	2.49075e+07	8.89282e+07	6.77184e+07	8.06459e+07
Q8TCT9-5;Q8TCT9;Q8TCT9-4;Q8TCT9-2;A0A075B6F6;A0A0C4DGU3	Q8TCT9-5;Q8TCT9;Q8TCT9-4;Q8TCT9-2;A0A075B6F6	Minor histocompatibility antigen H13	HM13	3.64485e+07	3.61565e+07	3.70515e+07	3.66053e+07	3.42438e+07	3.25681e+07
Q5T7C4;P09429;B2RPK0	Q5T7C4;P09429;B2RPK0	High mobility group protein B1;Putative high mobility group protein B1-like 1	HMGB1;HMGB1P1	3.98071e+07	3.55407e+07	4.07915e+07	1.70999e+07	1.45531e+07	1.31118e+07
Q9UK76;J3KT51;Q9UK76-3;Q9UK76-2;J3KSH8	Q9UK76;J3KT51;Q9UK76-3;Q9UK76-2	Hematological and neurological expressed 1 protein;Hematological and neurological expressed 1 protein, N-terminally processed	HN1	2.89198e+07	3.00799e+07	2.60138e+07	2.17263e+07	1.97248e+07	2.08833e+07
Q13151	Q13151	Heterogeneous nuclear ribonucleoprotein A0	HNRNPA0	5.11883e+07	2.26936e+07	4.7754e+07	6.36303e+07	6.45538e+07	7.76773e+07
F8W6I7;P09651-3;P09651-2;P09651;F8VZ49;H0YH80;Q32P51;F8VTQ5;F8VYN5;F8W646	F8W6I7;P09651-3;P09651-2;P09651;F8VZ49;H0YH80;Q32P51;F8VTQ5	Heterogeneous nuclear ribonucleoprotein A1;Heterogeneous nuclear ribonucleoprotein A1, N-terminally processed;Heterogeneous nuclear ribonucleoprotein A1-like 2	HNRNPA1;HNRNPA1L2	4.07233e+08	3.55022e+08	3.87624e+08	3.40906e+08	2.80777e+08	2.78725e+08
P22626;P22626-2;A0A087WUI2	P22626;P22626-2;A0A087WUI2	Heterogeneous nuclear ribonucleoproteins A2/B1	HNRNPA2B1	4.26794e+08	4.03866e+08	4.06017e+08	4.88064e+08	4.6322e+08	4.57903e+08
P51991;H7C1J8	P51991	Heterogeneous nuclear ribonucleoprotein A3	HNRNPA3	2.54615e+08	1.97519e+08	2.1736e+08	5.83704e+08	5.22289e+08	5.1696e+08
D6R9P3;D6RD18;D6RBZ0;Q99729-3;Q99729-2;Q99729-4;Q99729	D6R9P3;D6RD18;D6RBZ0;Q99729-3;Q99729-2;Q99729-4;Q99729	Heterogeneous nuclear ribonucleoprotein A/B	HNRNPAB	3.20332e+07	3.01034e+07	3.12802e+07	4.17449e+07	4.11471e+07	4.68798e+07
G3V4W0;B4DY08;B2R5W2;G3V4C1;P07910-2;P07910-4;G3V5X6;G3V3K6;G3V251;B4DSU6;G3V2D6;A0A0G2JPF8;A0A0G2JNQ3;P07910-3;P0DMR1;O60812;B7ZW38;B2RXH8;G3V4M8;G3V5V7;G3V2H6	G3V4W0;B4DY08;B2R5W2;G3V4C1;P07910-2;P07910-4;G3V5X6;G3V3K6;G3V251;B4DSU6;G3V2D6;A0A0G2JPF8;A0A0G2JNQ3;P07910-3;P0DMR1;O60812;B7ZW38;B2RXH8	Heterogeneous nuclear ribonucleoproteins C1/C2;Heterogeneous nuclear ribonucleoprotein C-like 4;Heterogeneous nuclear ribonucleoprotein C-like 1;Heterogeneous nuclear ribonucleoprotein C-like 3;Heterogeneous nuclear ribonucleoprotein C-like 2	HNRNPC;HNRNPCL4;HNRNPCL1;HNRNPCL3;HNRNPCL2	6.86305e+07	6.27002e+07	7.2024e+07	3.11505e+07	2.73891e+07	2.87948e+07
Q14103-3;Q14103;H0YA96;D6RAF8;H0Y8G5;Q14103-4;Q14103-2;D6RF44;D6RD83;D6RBQ9	Q14103-3;Q14103;H0YA96;D6RAF8;H0Y8G5;Q14103-4;Q14103-2;D6RF44	Heterogeneous nuclear ribonucleoprotein D0	HNRNPD	1.81771e+08	1.58357e+08	1.89993e+08	1.50769e+08	1.54895e+08	1.48479e+08
O14979-3;O14979-2;A0A087WUK2;O14979;A0A087WU03	O14979-3;O14979-2;A0A087WUK2;O14979	Heterogeneous nuclear ribonucleoprotein D-like	HNRNPDL	5.84413e+07	6.0638e+07	6.49204e+07	6.14074e+07	5.71085e+07	6.10456e+07
P52597;A0A1B0GW42	P52597	Heterogeneous nuclear ribonucleoprotein F;Heterogeneous nuclear ribonucleoprotein F, N-terminally processed	HNRNPF	3.84475e+07	2.74232e+07	3.31163e+07	3.87823e+07	3.1073e+07	3.37995e+07
G8JLB6;P31943;E9PCY7;D6RIT2;D6RIU0;D6RBM0;E7EQJ0;D6RAM1;D6R9T0;D6RFM3;D6RDU3;D6RJ04;D6RIH9;H0YB39;E5RGV0;E7EN40;D6RDL0;H0YBG7;H0YBD7;D6R9D3;D6RF17;E5RGH4;E5RJ94;H0YAQ2	G8JLB6;P31943;E9PCY7;D6RIT2;D6RIU0;D6RBM0;E7EQJ0;D6RAM1;D6R9T0;D6RFM3;D6RDU3;D6RJ04;D6RIH9;H0YB39	Heterogeneous nuclear ribonucleoprotein H;Heterogeneous nuclear ribonucleoprotein H, N-terminally processed	HNRNPH1	1.36066e+08	1.37041e+08	1.39546e+08	2.05021e+08	1.88039e+08	1.94766e+08
P31942-3;P31942-2;P31942;P31942-4;P31942-6;P31942-5	P31942-3;P31942-2;P31942;P31942-4	Heterogeneous nuclear ribonucleoprotein H3	HNRNPH3	3.72043e+07	3.10811e+07	3.85948e+07	2.22058e+07	2.73591e+07	2.56073e+07
P61978;P61978-2;S4R457;S4R359	P61978;P61978-2	Heterogeneous nuclear ribonucleoprotein K	HNRNPK	3.63971e+08	3.36813e+08	3.4143e+08	4.01442e+08	4.28776e+08	4.02495e+08
P14866;M0QXS5;P14866-2;M0R1W6;B4DVF8;M0QYL7;M0R076;H7C464;B7WPG3;C9IYN3;D6W592;Q8WVV9-5;Q8WVV9-4;Q8WVV9	P14866;M0QXS5;P14866-2	Heterogeneous nuclear ribonucleoprotein L	HNRNPL	1.36863e+08	1.3464e+08	1.29459e+08	1.87566e+08	1.64456e+08	1.76766e+08
P52272;A0A087X0X3;P52272-2;M0QZM1;M0R019;M0R2T0;M0R2I7;M0R0N3;M0QYQ7;M0QY96;M0R0Y6;M0QYL3	P52272;A0A087X0X3;P52272-2;M0QZM1	Heterogeneous nuclear ribonucleoprotein M	HNRNPM	1.71791e+08	1.5508e+08	1.58034e+08	2.28311e+08	2.1986e+08	2.20073e+08
O43390;O43390-2;O43390-4;O43390-3;B4DT28;A0A286YEZ8	O43390;O43390-2;O43390-4;O43390-3;B4DT28	Heterogeneous nuclear ribonucleoprotein R	HNRNPR	9.94193e+07	1.0419e+08	1.0956e+08	1.10116e+08	1.20802e+08	1.10716e+08
Q00839-2;Q00839;A0A1X7SBS1;A0A1W2PPS1;A0A1W2PP35;Q5RI18;A0A1W2PPL4;A0A1W2PPH7;A0A1W2PQL0;A0A1W2PP34;A0A1W2PQ74;A0A1W2PRZ7;A0A1W2PQD4;A0A1W2PPE9;A0A1W2PRI6;A0A1W2PNG3;A0A1W2PP22	Q00839-2;Q00839;A0A1X7SBS1;A0A1W2PPS1;A0A1W2PP35;Q5RI18;A0A1W2PPL4;A0A1W2PPH7;A0A1W2PQL0;A0A1W2PP34;A0A1W2PQ74;A0A1W2PRZ7	Heterogeneous nuclear ribonucleoprotein U	HNRNPU	1.76749e+08	1.92684e+08	1.85581e+08	8.64084e+07	8.71738e+07	8.36013e+07
Q1KMD3;H3BQZ7	Q1KMD3;H3BQZ7	Heterogeneous nuclear ribonucleoprotein U-like protein 2	HNRNPUL2;HNRNPUL2-BSCL2	6.14634e+07	4.59765e+07	5.26852e+07	4.68987e+07	4.78367e+07	5.3192e+07
P37235;E9PC71;H7BZC1;P84074;P61601;E5RGA9;C9JW46;E5RK89;E5RFL9;E5RJT1;E5RJJ6;E5RGZ0;E5RI95;A0A1B0GXG3;E5RHE8;E5RI78;E5RHC8;E5RIG4;E5RIZ1;E5RIA5	P37235;E9PC71	Hippocalcin-like protein 1	HPCAL1	6.62184e+07	7.39483e+07	5.59914e+07	5.10191e+07	4.97313e+07	3.22985e+07
P00492	P00492	Hypoxanthine-guanine phosphoribosyltransferase	HPRT1	2.03554e+07	2.02088e+07	2.3117e+07	2.07653e+07	1.75019e+07	1.56384e+07
P07900;P07900-2;Q58FG0;Q14568;G3V2J8	P07900;P07900-2	Heat shock protein HSP 90-alpha	HSP90AA1	8.3886e+08	8.9039e+08	8.97558e+08	3.58779e+08	3.39527e+08	3.59441e+08
P08238;Q58FF7;Q58FG1	P08238	Heat shock protein HSP 90-beta	HSP90AB1	1.59694e+09	1.59574e+09	1.6076e+09	1.43893e+09	1.40482e+09	1.42165e+09
P14625;Q96GW1;A0A1W2PRR1;H0YIV0;Q58FF3;F8W026	P14625	Endoplasmin	HSP90B1	6.3583e+08	6.59686e+08	7.38463e+08	9.2662e+07	6.42482e+07	7.8032e+07
P34932;A0A087WYC1;A0A087WTS8;P34932-2;D6RJ96;E9PDE8;O95757	P34932;A0A087WYC1;A0A087WTS8	Heat shock 70 kDa protein 4	HSPA4	8.91966e+07	1.02265e+08	1.11883e+08	1.24327e+08	1.24416e+08	1.18692e+08
P61604;B8ZZL8;B8ZZ54	P61604;B8ZZL8;B8ZZ54	10 kDa heat shock protein, mitochondrial	HSPE1	1.11977e+08	1.08681e+08	1.03638e+08	1.07484e+08	1.0453e+08	9.35367e+07
Q92598-2;Q92598;Q92598-4;Q92598-3;A0A0A0MSM0;R4GN69;Q5TBM3	Q92598-2;Q92598;Q92598-4;Q92598-3;A0A0A0MSM0	Heat shock protein 105 kDa	HSPH1	4.01457e+07	3.05752e+07	3.66049e+07	5.34277e+07	4.77726e+07	4.95981e+07
A0A087X054;Q9Y4L1;E9PJ21;A0A087WWI4;K7EQK2;Q9Y4L1-2;J3KTF1;J3QL06;Q9BST8;J3QQH7;J3QLE9;A0A087X214;A0A087WW13	A0A087X054;Q9Y4L1;E9PJ21;A0A087WWI4;K7EQK2;Q9Y4L1-2	Hypoxia up-regulated protein 1	HYOU1	1.39054e+07	9.24834e+06	1.06781e+07	1.19777e+08	1.67099e+08	1.65151e+08
P41252;A0A0A0MSX9;J3KR24;Q5TCD1;Q5TCC9	P41252;A0A0A0MSX9;J3KR24	Isoleucine--tRNA ligase, cytoplasmic	IARS	2.02747e+07	2.83316e+07	2.43739e+07	2.80799e+07	3.34777e+07	3.46326e+07
O75874;C9J4N6;C9JJE5;C9JLU6	O75874	Isocitrate dehydrogenase [NADP] cytoplasmic	IDH1	2.24708e+07	2.30736e+07	2.88968e+07	5.75818e+07	5.15981e+07	4.58055e+07
P48735;P48735-2;H0YL11	P48735;P48735-2;H0YL11	Isocitrate dehydrogenase [NADP], mitochondrial	IDH2	2.94754e+07	2.64444e+07	2.72707e+07	7.65415e+07	7.02315e+07	6.86307e+07
Q12905;B4DY09;A0A0A0MRL0;X6R6Z1	Q12905;B4DY09	Interleukin enhancer-binding factor 2	ILF2	5.29986e+07	5.42893e+07	6.13883e+07	6.8877e+07	6.81862e+07	7.10044e+07
Q12906;Q12906-7;Q12906-5;Q12906-4;Q12906-2;Q12906-6;Q12906-3;K7EKJ9;K7EQR9;K7ERM6;K7ENK6;K7EM82;K7EJ09;K7ER69;K7EQ75;K7EPG3;K7ELV3;K7EKY0	Q12906;Q12906-7;Q12906-5;Q12906-4;Q12906-2;Q12906-6;Q12906-3	Interleukin enhancer-binding factor 3	ILF3	4.09005e+07	4.52346e+07	4.85071e+07	7.56529e+07	7.55747e+07	7.44696e+07
P12268;H0Y4R1;E7ETK5;C9K0R9;C9J381;P20839-2;P20839-4;P20839;P20839-3;P20839-7;P20839-5;P20839-6	P12268;H0Y4R1	Inosine-5-monophosphate dehydrogenase 2	IMPDH2	7.62085e+07	7.22683e+07	7.26572e+07	5.00592e+07	4.46906e+07	4.87102e+07
O00410;H0Y8C6;O00410-3;O00410-2;C9JMV5;E7ETV3;H0Y3V4;E7EQT5;C9JZ53;E7EV12;C9JZD8;E7EWK4;E7EX05;O60518;C9J875;C9JQT6;E7ESA1;E7ESZ1;E7ETV8	O00410;H0Y8C6;O00410-3;O00410-2	Importin-5	IPO5	9.08413e+07	9.84554e+07	1.05314e+08	7.41369e+07	7.04453e+07	7.15547e+07
P46940;A0A0J9YXZ5;H0YLE8;A0A087WWP1;F2Z2E2;Q86VI3;H0YKA5;A0A087X225;E9PDT6;E7EWC2;F5H7S7;Q13576-3;Q13576-2;Q13576	P46940;A0A0J9YXZ5;H0YLE8	Ras GTPase-activating-like protein IQGAP1	IQGAP1	2.98307e+08	3.09563e+08	3.21012e+08	2.4445e+08	2.43556e+08	2.506e+08
P17301;D6RG08	P17301	Integrin alpha-2	ITGA2	3.75408e+07	4.1946e+07	4.90162e+07	1.70162e+07	7.8221e+06	1.85472e+07
P05556;P05556-2;P05556-5;P05556-4;P05556-3;C9JPK5;E7ERX5;Q5T3E6;E9PLR6;E7EUI6;E7EQW5;C9JJP8;Q5T3E5;E9PQJ2;H7C4N8	P05556;P05556-2;P05556-5;P05556-4;P05556-3	Integrin beta-1	ITGB1	2.23062e+08	2.31003e+08	2.46402e+08	8.02416e+07	6.5513e+07	7.9382e+07
Q15046;Q15046-2;H3BVA8;H3BRC9;J3KRL2;H3BPV7	Q15046;Q15046-2	Lysine--tRNA ligase	KARS	3.42817e+07	2.78267e+07	3.19813e+07	3.57045e+07	3.4821e+07	4.81751e+07
Q07666-3;Q07666;Q07666-2	Q07666-3;Q07666;Q07666-2	KH domain-containing, RNA-binding, signal transduction-associated protein 1	KHDRBS1	4.09728e+07	3.85678e+07	7.21025e+07	4.50277e+07	3.48189e+07	4.13461e+07
Q92945;A0A087WTP3;M0R0I5;M0QYH3;M0QXW7;M0R0C6;M0R3J3;M0R251;M0QYG1;M0R263	Q92945;A0A087WTP3;M0R0I5	Far upstream element-binding protein 2	KHSRP	3.80576e+07	3.87535e+07	3.201e+07	4.44024e+07	4.02788e+07	4.61724e+07
P33176;A0A0G2JMZ6;J3KNA1;O60282;Q12840;O60282-2	P33176	Kinesin-1 heavy chain	KIF5B	4.62624e+07	4.59647e+07	4.54883e+07	2.88195e+07	2.69017e+07	2.81441e+07
Q14974;Q14974-2;J3KTM9;J3QR48;J3QKQ5;J3QRG4	Q14974;Q14974-2;J3KTM9	Importin subunit beta-1	KPNB1	1.05813e+08	1.158e+08	1.37086e+08	1.0982e+08	1.00652e+08	1.17293e+08
P13645;Q7Z3Y7;Q7Z3Z0;Q7Z3Y8;F8VZY9;C4AM86;Q14525;Q15323;O76013-2;P05783;Q14532;O76014;Q92764;O76015;O76013;Q7Z3Y9;Q99456;Q2M2I5	P13645	Keratin, type I cytoskeletal 10	KRT10	1.5656e+08	3.5926e+08	1.75122e+08	1.19644e+08	1.38282e+08	8.87509e+07
P02533;P08779;Q04695;P19012;F5GWP8;P08727;C9JM50;K7EPJ9;K7ERE3;P13646-3;P13646;K7EMD9;A8MT21;P19012-2;P13646-2;K7ESE1;K7ENW6;K7EMS3;C9JTG5;Q8N1A0-2;Q8N1A0;P35900	P02533;P08779;Q04695;P19012	Keratin, type I cytoskeletal 14;Keratin, type I cytoskeletal 16;Keratin, type I cytoskeletal 17;Keratin, type I cytoskeletal 15	KRT14;KRT16;KRT17;KRT15	1.01058e+07	2.38603e+07	1.09666e+07	8.62574e+06	1.38912e+07	1.03945e+07
P35908;P19013;Q7Z794;H0YID6	P35908	Keratin, type II cytoskeletal 2 epidermal	KRT2	1.27439e+08	2.87649e+08	1.15755e+08	1.18859e+08	1.182e+08	5.90774e+07
P35527;K7EQQ3	P35527;K7EQQ3	Keratin, type I cytoskeletal 9	KRT9	2.29624e+08	6.50314e+08	1.86026e+08	2.12111e+08	2.3478e+08	1.57134e+08
Q86UP2-2;Q86UP2-3;Q86UP2-4;Q86UP2;G3V4Y7;B7Z6P3;G3V5P0;H0YJZ8;H0YJP2;G3V5G2;H0YJV5	Q86UP2-2;Q86UP2-3;Q86UP2-4;Q86UP2	Kinectin	KTN1	1.07532e+08	8.04124e+07	7.78483e+07	1.61124e+07	2.92372e+07	2.02367e+07
Q16719;B8ZZA3;Q16719-2;A0A087X297;F8WEP1;A0A087WYM2;A0A087WYQ7	Q16719	Kynureninase	KYNU	2.40191e+07	2.30053e+07	1.98744e+07	1.58206e+07	1.65602e+07	1.5605e+07
P28838-2;P28838;H0Y9Q1;H0Y983	P28838-2;P28838	Cytosol aminopeptidase	LAP3	3.96415e+07	4.23634e+07	3.87444e+07	1.47362e+07	1.6236e+07	2.19019e+07
Q14847;C9J9W2;Q14847-3;Q14847-2;J3KSN1;F6S2S5	Q14847;C9J9W2;Q14847-3;Q14847-2	LIM and SH3 domain protein 1	LASP1	4.38734e+07	3.68044e+07	3.61562e+07	4.04891e+07	3.52743e+07	3.7661e+07
P00338;P00338-3;P00338-4;P00338-5;P00338-2;F5GXY2;F5GYU2;F5GXH2;F5H5J4;F5H6W8;F5GZQ4;F5H8H6;F5GXC7;F5GWW2;F5GXU1;F5H5G7;F5H155;A0A087WUM2;G3XAP5;F5H245;Q6ZMR3;P07864	P00338;P00338-3;P00338-4;P00338-5;P00338-2	L-lactate dehydrogenase A chain	LDHA	4.14142e+09	3.69944e+09	3.96014e+09	2.45909e+09	2.68893e+09	2.84613e+09
P07195;A8MW50;C9J7H8;F5H793	P07195;A8MW50	L-lactate dehydrogenase B chain;L-lactate dehydrogenase	LDHB	4.88496e+08	4.99898e+08	5.24996e+08	3.90537e+08	3.68984e+08	3.92207e+08
P09382;F8WEI7	P09382	Galectin-1	LGALS1	1.75659e+09	1.54781e+09	1.69289e+09	1.09534e+09	1.12129e+09	1.06885e+09
P17931;G3V3R6	P17931;G3V3R6	Galectin-3;Galectin	LGALS3	2.50621e+07	2.91001e+07	2.17264e+07	2.16508e+07	2.07357e+07	1.91654e+07
P02545;P02545-6;P02545-3;P02545-5;P02545-4;H0YAB0;A0A0C4DGC5	P02545;P02545-6;P02545-3;P02545-5;P02545-4	Prelamin-A/C;Lamin-A/C	LMNA	6.80676e+08	6.21633e+08	6.42543e+08	7.04236e+08	6.89616e+08	6.7679e+08
P20700;E9PBF6;A0A0D9SFE5;A0A0D9SFY5	P20700;E9PBF6;A0A0D9SFE5	Lamin-B1	LMNB1	4.21878e+07	3.23791e+07	2.80822e+07	7.17773e+07	7.75251e+07	8.35192e+07
Q03252	Q03252	Lamin-B2	LMNB2	2.37769e+07	2.58157e+07	2.73662e+07	3.23329e+07	3.99855e+07	2.64495e+07
K7EKE6;K7EJE8;P36776-3;P36776-2;P36776;K7ER27;K7ERR6;K7ER56	K7EKE6;K7EJE8;P36776-3;P36776-2;P36776	Lon protease homolog, mitochondrial	LONP1	2.76283e+07	2.5884e+07	4.68948e+07	2.7026e+07	2.32054e+07	2.5884e+07
Q96AG4;I3L223	Q96AG4	Leucine-rich repeat-containing protein 59	LRRC59	4.43032e+07	5.05075e+07	4.47204e+07	3.78091e+07	4.21569e+07	4.18407e+07
Q9Y383;Q96HJ9-2;A0A0A6YYJ8;Q9Y383-3;Q9Y383-2;B8ZZ10;A8MYV2;Q9NQ29-2;Q9NQ29-3;Q9NQ29;V9GZ75;F8WEU3;B8ZZ09	Q9Y383;Q96HJ9-2;A0A0A6YYJ8;Q9Y383-3;Q9Y383-2	Putative RNA-binding protein Luc7-like 2	LUC7L2	9.68343e+06	1.25877e+07	9.11358e+06	9.09257e+06	1.01234e+07	7.54243e+06
P61326;Q96A72;F5H6N1;F5H6P7;P61326-2;F5H3U9	P61326;Q96A72;F5H6N1;F5H6P7;P61326-2	Protein mago nashi homolog;Protein mago nashi homolog 2	MAGOH;MAGOHB	1.36181e+07	1.24713e+07	1.55796e+07	1.32049e+07	1.37684e+07	1.47182e+07
P46821;D6RA32;D6RA40;D6RCL2;D6RGJ3	P46821	Microtubule-associated protein 1B;MAP1B heavy chain;MAP1 light chain LC1	MAP1B	2.14204e+08	1.97573e+08	2.23491e+08	9.52471e+07	7.81312e+07	7.53949e+07
E7EVA0;P27816-6;P27816;P27816-2;P27816-5;H7C456;P27816-4;H7C4C5;B5MEG9;H0Y2V1;F8W9U4;A0A0J9YVV8;A0A0J9YW37;P27816-7	E7EVA0;P27816-6;P27816;P27816-2;P27816-5	Microtubule-associated protein;Microtubule-associated protein 4	MAP4	1.51077e+08	1.35398e+08	1.41e+08	1.24327e+08	1.18469e+08	1.1631e+08
Q15691;C9JB30;Q9UPY8-2;Q9UPY8	Q15691	Microtubule-associated protein RP/EB family member 1	MAPRE1	6.10494e+07	5.93935e+07	5.41055e+07	5.71289e+07	5.15093e+07	5.37514e+07
P29966	P29966	Myristoylated alanine-rich C-kinase substrate	MARCKS	9.19818e+07	7.74109e+07	7.47224e+07	1.05831e+08	1.04417e+08	9.65742e+07
A0A0R4J2E8;A8MXP9;P43243;D6REM6;D6R991;B3KM87;P43243-2;H0Y8T4;Q68E03;D6R8Z5;D6RBI2;D6RBK5;D6RE02;D6RIA2;D6RAM9;D6RAY2;D6RCM3;D6REK4	A0A0R4J2E8;A8MXP9;P43243;D6REM6;D6R991;B3KM87;P43243-2;H0Y8T4	Matrin-3	MATR3	8.00105e+07	8.30894e+07	8.79621e+07	7.86522e+07	7.41736e+07	7.48739e+07
Q8NI22;Q8NI22-2;Q8NI22-3;H7BZ18	Q8NI22;Q8NI22-2;Q8NI22-3;H7BZ18	Multiple coagulation factor deficiency protein 2	MCFD2	4.21542e+07	5.10049e+07	4.74528e+07	3.55168e+07	4.15973e+07	3.6311e+07
P25205;P25205-2;J3KQ69;Q7Z6P5	P25205;P25205-2;J3KQ69	DNA replication licensing factor MCM3	MCM3	8.57498e+06	1.21639e+07	8.50791e+06	7.93204e+06	8.41372e+06	9.28495e+06
P40925;P40925-3;B9A041;P40925-2;B8ZZ51;C9JF79;C9JLV6	P40925;P40925-3;B9A041;P40925-2;B8ZZ51;C9JF79	Malate dehydrogenase, cytoplasmic;Malate dehydrogenase	MDH1	5.80293e+07	4.55036e+07	6.18868e+07	5.1571e+07	5.70207e+07	5.22393e+07
P40926;P40926-2;G3XAL0	P40926;P40926-2;G3XAL0	Malate dehydrogenase, mitochondrial;Malate dehydrogenase	MDH2	1.74946e+08	1.62466e+08	1.86599e+08	1.56207e+08	1.66707e+08	1.56151e+08
P14174	P14174	Macrophage migration inhibitory factor	MIF	7.28592e+07	9.69771e+07	6.27704e+07	1.40292e+08	9.66635e+07	8.37148e+07
E9PIE4;Q9Y6C9	E9PIE4;Q9Y6C9	Mitochondrial carrier homolog 2	MTCH2	1.35122e+07	1.08894e+07	7.71546e+06	1.24225e+07	9.80821e+06	1.11516e+07
P11586;F5H2F4;V9GYY3	P11586;F5H2F4	C-1-tetrahydrofolate synthase, cytoplasmic;Methylenetetrahydrofolate dehydrogenase;Methenyltetrahydrofolate cyclohydrolase;Formyltetrahydrofolate synthetase;C-1-tetrahydrofolate synthase, cytoplasmic, N-terminally processed	MTHFD1	1.04111e+08	1.10442e+08	1.28791e+08	6.4575e+07	5.70445e+07	6.0023e+07
Q969H8;M0QYN0;M0QXF7	Q969H8;M0QYN0;M0QXF7	Myeloid-derived growth factor	MYDGF	7.31255e+07	6.74597e+07	5.34903e+07	6.00026e+07	3.68158e+07	4.3363e+07
P35579;P35579-2;P35749-4;P35749-3;P35749;P35749-2;Q5BKV1;B1AH99;A0A0C4DFM8;E7ERA5;A1L2Z2;REV__S4R3H4;REV__E7EQT4;REV__Q9UKV3-5;REV__Q9UKV3	P35579;P35579-2	Myosin-9	MYH9	1.66833e+09	1.55945e+09	1.6372e+09	1.6955e+09	1.72128e+09	1.68739e+09
O14950	O14950	Myosin regulatory light chain 12B	MYL12B	1.42806e+08	1.43798e+08	1.47194e+08	1.56849e+08	1.64962e+08	1.55543e+08
P60660-2;G8JLA2;F8VZU9;F8W180;F8VXL3	P60660-2;G8JLA2;F8VZU9;F8W180	Myosin light polypeptide 6	MYL6	2.47036e+08	2.12804e+08	2.28253e+08	2.29709e+08	2.41026e+08	2.30137e+08
F5H6E2;O00159-2;O00159-3;O00159;I3L204;I3L4D4;I3L501;I3L3Y6;I3L168;I3L3F5	F5H6E2;O00159-2;O00159-3;O00159	Unconventional myosin-Ic	MYO1C	1.96321e+07	1.69415e+07	1.88636e+07	2.27934e+07	2.64794e+07	2.39391e+07
Q9NZM1-6;Q9NZM1-3;Q9NZM1;Q9NZM1-2;Q9NZM1-5;H0YD14;Q9NZM1-7;Q9NZM1-8;Q9NZM1-4	Q9NZM1-6;Q9NZM1-3;Q9NZM1;Q9NZM1-2;Q9NZM1-5;H0YD14	Myoferlin	MYOF	2.80162e+07	2.95836e+07	3.79361e+07	2.63905e+07	2.65197e+07	2.09431e+07
F8VZJ2;H0YHX9;Q13765;E9PAV3-2;E9PAV3;F8W1N5;F8VNW4;F8W0W4;F8VZ58;Q9BZK3	F8VZJ2;H0YHX9;Q13765;E9PAV3-2;E9PAV3;F8W1N5;F8VNW4;F8W0W4	Nascent polypeptide-associated complex subunit alpha;Nascent polypeptide-associated complex subunit alpha, muscle-specific form	NACA	3.38131e+07	3.05901e+07	2.76494e+07	2.59977e+07	2.26654e+07	2.49566e+07
P43490;A0A0C4DFS8;C9JG65;C9JF35	P43490;A0A0C4DFS8	Nicotinamide phosphoribosyltransferase	NAMPT	4.42026e+08	4.5241e+08	5.33492e+08	9.72843e+07	6.8117e+07	7.7576e+07
P54920;M0R0Y2;M0R2M1;M0R0I4;M0R213;M0R058;M0QZM9;M0QZN5;M0R031;M0R027	P54920;M0R0Y2;M0R2M1;M0R0I4	Alpha-soluble NSF attachment protein	NAPA	2.15389e+07	1.98277e+07	2.14167e+07	1.93575e+07	1.48205e+07	1.57418e+07
P19338;H7BY16;C9JYW2;C9JLB1;C9J1H7;C9JWL1	P19338;H7BY16	Nucleolin	NCL	1.67661e+08	1.65669e+08	1.68238e+08	1.01649e+08	1.08485e+08	1.02587e+08
Q92597;Q92597-3;Q92597-2;E7ESM1;E5RJY1;E5RIR1;E5RGM5;E5RIV1;E5RIM2;E5RI76;E5RH82;E5RJ98;E5RG99	Q92597;Q92597-3;Q92597-2	Protein NDRG1	NDRG1	2.5038e+08	2.36073e+08	3.05451e+08	2.05531e+08	2.24641e+08	2.17256e+08
Q32Q12;P22392-2;J3KPD9;P22392;E7ERL0;E5RHP0;F6XY72;C9K028	Q32Q12;P22392-2;J3KPD9;P22392;E7ERL0	Nucleoside diphosphate kinase;Nucleoside diphosphate kinase B	NME1-NME2;NME2;NME1	4.97406e+08	4.53424e+08	4.46207e+08	4.57041e+08	4.62301e+08	4.68342e+08
Q15233;Q15233-2;H7C367;C9JYS8;C9IZL7;C9J4X2	Q15233;Q15233-2;H7C367;C9JYS8	Non-POU domain-containing octamer-binding protein	NONO	1.19765e+08	1.06176e+08	1.1008e+08	1.40812e+08	1.37364e+08	1.54378e+08
E9PLK3;P55786;P55786-2;A6NEC2;E9PP11;H0YDG0;E9PJY4;E9PPD4;A6NEC2-3;A6NEC2-2;H0YCQ5;E9PJF9;E9PPZ2	E9PLK3;P55786;P55786-2	Puromycin-sensitive aminopeptidase	NPEPPS	4.17349e+07	2.86304e+07	3.5873e+07	3.10852e+07	4.22705e+07	3.87231e+07
P06748-2;P06748;P06748-3;E5RI98;E5RGW4	P06748-2;P06748;P06748-3	Nucleophosmin	NPM1	6.68358e+08	6.28753e+08	6.88546e+08	6.62368e+08	7.21055e+08	7.10348e+08
P15559-2;P15559;H3BNV2;B4DLR8;P15559-3;H3BRK3	P15559-2;P15559;H3BNV2;B4DLR8;P15559-3;H3BRK3	NAD(P)H dehydrogenase [quinone] 1	NQO1	9.01411e+07	5.88171e+07	6.57329e+07	6.29611e+08	6.69544e+08	6.8429e+08
Q9Y266;A0A0A0MSU9;A0A0A0MSS4	Q9Y266	Nuclear migration protein nudC	NUDC	3.51287e+07	3.66433e+07	3.50139e+07	2.73045e+07	2.79084e+07	2.58252e+07
J3KQ32;Q9NTK5;Q9NTK5-3;Q9NTK5-2;C9JTK6;C9JCJ9	J3KQ32;Q9NTK5;Q9NTK5-3;Q9NTK5-2	Obg-like ATPase 1	OLA1	3.46738e+07	4.34745e+07	5.33906e+07	1.30713e+08	1.50807e+08	1.27955e+08
J3KR44;Q96FW1;F5H6Q1;F5GYJ8;F5GYN4;F5H3F0;Q96FW1-2	J3KR44;Q96FW1;F5H6Q1;F5GYJ8;F5GYN4;F5H3F0	Ubiquitin thioesterase OTUB1	OTUB1	2.18167e+07	2.26573e+07	2.40324e+07	2.5963e+07	2.74386e+07	2.75532e+07
P13674-2;P13674;P13674-3	P13674-2;P13674;P13674-3	Prolyl 4-hydroxylase subunit alpha-1	P4HA1	1.21851e+08	1.1104e+08	1.22108e+08	8.96066e+07	8.47113e+07	8.04016e+07
O15460-2;O15460;E7ENX0;E7EPI9;E7ERI1;C9JX45;A8MXE0;C9JCP0;C9JN43;C9JIG4;C9JFJ1	O15460-2;O15460	Prolyl 4-hydroxylase subunit alpha-2	P4HA2	1.34913e+08	1.34682e+08	1.43757e+08	5.96691e+07	5.85736e+07	5.6273e+07
P07237;H7BZ94;H0Y3Z3;I3L398;I3L312;I3NI03;I3L0S0;I3L3U6;I3L4M2;I3L514;I3L3P5;I3L1Y5	P07237;H7BZ94;H0Y3Z3	Protein disulfide-isomerase	P4HB	8.85445e+08	8.4984e+08	9.01461e+08	5.55568e+08	5.69103e+08	5.56305e+08
Q9UQ80;Q9UQ80-2;F8VR77;F8W0A3;H0YIN7;F8VZ69	Q9UQ80;Q9UQ80-2;F8VR77	Proliferation-associated protein 2G4	PA2G4	7.85755e+07	8.68135e+07	8.90791e+07	6.04423e+07	6.28502e+07	5.20903e+07
E7ERJ7;P11940;P11940-2;A0A087WTT1;E7EQV3;H0YAR2;Q9H361;H0YBN4;E5RH24;E5RJB9;H0YAP2;H0YB86;H0Y5F5;Q4VXU2;E5RHG7;E5RGH3;H0YAS6;H0YB75;E5RGC4;E5RFD8;H0YEQ8;H0YAS7;H0YEU6;Q4VXU2-2;E5RJM8;H0YER0;H0Y6X6;H0YCC8;Q5JQF8	E7ERJ7;P11940;P11940-2;A0A087WTT1;E7EQV3;H0YAR2	Polyadenylate-binding protein;Polyadenylate-binding protein 1	PABPC1	7.89172e+07	7.16897e+07	7.57428e+07	6.78507e+07	6.81511e+07	6.72179e+07
P22234;E9PBS1;P22234-2;D6RF62	P22234;E9PBS1;P22234-2;D6RF62	Multifunctional protein ADE2;Phosphoribosylaminoimidazole-succinocarboxamide synthase;Phosphoribosylaminoimidazole carboxylase	PAICS	7.03297e+07	7.66819e+07	7.68894e+07	4.74649e+07	4.69559e+07	3.88508e+07
Q15365	Q15365	Poly(rC)-binding protein 1	PCBP1	9.45836e+07	8.87615e+07	1.10324e+08	1.07188e+08	1.00314e+08	1.01163e+08
Q15366-3;Q15366-4;Q15366-6;Q15366-2;F8VZX2;Q15366-5;Q15366;H3BRU6;Q15366-7;Q15366-8;F8VXH9;F8W0G4;F8VRH0;F8W1G6;H3BND9;H3BSS4;E9PFP8;P57721-5;P57721-4;P57721;J3QT27;P57721-2;P57721-3;F8VTZ0	Q15366-3;Q15366-4;Q15366-6;Q15366-2;F8VZX2;Q15366-5;Q15366;H3BRU6;Q15366-7;Q15366-8;F8VXH9	Poly(rC)-binding protein 2	PCBP2	1.35395e+08	1.4082e+08	1.40077e+08	1.53381e+08	1.45913e+08	1.42337e+08
F6S8N6;A0A0A0MRJ6;H7BY58;P22061;P22061-2;C9J0F2;F8WDT3;F8WAV5;F8WAX2	F6S8N6;A0A0A0MRJ6;H7BY58;P22061;P22061-2	Protein-L-isoaspartate O-methyltransferase;Protein-L-isoaspartate(D-aspartate) O-methyltransferase	PCMT1	4.57771e+07	3.87321e+07	5.72473e+07	3.29256e+07	3.60156e+07	2.82374e+07
P12004	P12004	Proliferating cell nuclear antigen	PCNA	3.02249e+07	2.05759e+07	1.80787e+07	5.41867e+07	6.17682e+07	5.22281e+07
P13667;C9JMN9	P13667	Protein disulfide-isomerase A4	PDIA4	1.81959e+08	1.70173e+08	1.72269e+08	1.07882e+08	1.10044e+08	1.00737e+08
Q15084-3;Q15084;Q15084-4;Q15084-5;Q15084-2	Q15084-3;Q15084;Q15084-4;Q15084-5;Q15084-2	Protein disulfide-isomerase A6	PDIA6	1.13895e+08	1.25044e+08	1.25471e+08	8.97862e+07	8.60721e+07	9.06867e+07
Q15121;Q15121-2;B1AKZ5	Q15121;Q15121-2;B1AKZ5	Astrocytic phosphoprotein PEA-15	PEA15	2.532e+07	3.01322e+07	2.00993e+07	2.00757e+07	1.91487e+07	1.64411e+07
P30086	P30086	Phosphatidylethanolamine-binding protein 1;Hippocampal cholinergic neurostimulating peptide	PEBP1	2.01688e+08	1.93004e+08	1.9482e+08	1.71478e+08	1.62525e+08	1.66682e+08
P17858;P17858-2;F8WEU2	P17858;P17858-2	ATP-dependent 6-phosphofructokinase, liver type	PFKL	5.99434e+07	5.9813e+07	5.93146e+07	1.13717e+08	9.84043e+07	1.16219e+08
Q01813;Q01813-2;B1APP6;B1APP8;Q5VSR5;H0Y757;V9GYV7;V9GY25;H0Y3Y3	Q01813;Q01813-2	ATP-dependent 6-phosphofructokinase, platelet type	PFKP	2.34918e+08	2.67678e+08	2.70384e+08	1.56676e+08	1.62784e+08	1.67371e+08
P07737;K7EJ44;I3L3D5	P07737;K7EJ44	Profilin-1	PFN1	7.7935e+08	7.32876e+08	8.05011e+08	6.97543e+08	6.57877e+08	7.14979e+08
G5E9Q6;P35080-2;C9J0J7;C9JQ45;P35080;C9J2N0;C9J712;C9J5V8;F2Z3G0	G5E9Q6;P35080-2;C9J0J7;C9JQ45;P35080;C9J2N0	Profilin;Profilin-2	PFN2	2.36983e+07	2.43054e+07	2.79538e+07	4.30211e+07	4.18224e+07	4.44393e+07
P52209-2;P52209;K7EM49;K7EPF6;K7EMN2;K7ELN9	P52209-2;P52209	6-phosphogluconate dehydrogenase, decarboxylating	PGD	1.59222e+08	1.41834e+08	1.33129e+08	4.73394e+08	4.97189e+08	4.92494e+08
P00558;P00558-2;P07205	P00558;P00558-2	Phosphoglycerate kinase 1	PGK1	3.18382e+09	3.12242e+09	3.41855e+09	2.12193e+09	2.01771e+09	2.09036e+09
O95336;M0R261;M0R1L2;M0R0U3	O95336;M0R261	6-phosphogluconolactonase	PGLS	4.27213e+07	4.90441e+07	4.30031e+07	4.93665e+07	4.52193e+07	4.5918e+07
P36871;P36871-2;P36871-3	P36871;P36871-2;P36871-3	Phosphoglucomutase-1	PGM1	1.08779e+08	1.29474e+08	1.19149e+08	1.06831e+08	1.09961e+08	1.10706e+08
O00264;O00264-2	O00264;O00264-2	Membrane-associated progesterone receptor component 1	PGRMC1	4.93768e+07	4.99279e+07	7.72511e+07	2.26955e+07	1.66924e+07	1.39966e+07
J3KPX7;Q99623;F5GY37;Q99623-2;F5H3X6;F5GWA7;F5H0C5;F5H2D2;U3KPZ5	J3KPX7;Q99623;F5GY37;Q99623-2;F5H3X6;F5GWA7	Prohibitin-2	PHB2	5.10562e+07	4.85136e+07	5.05765e+07	4.34006e+07	4.3401e+07	5.03937e+07
Q9Y237;Q9Y237-2;H0Y4T6;J3KMW3;H0Y8P6;H0Y610;Q9Y237-3	Q9Y237;Q9Y237-2	Peptidyl-prolyl cis-trans isomerase NIMA-interacting 4	PIN4	1.20363e+07	1.38322e+07	9.54741e+06	1.23715e+07	1.34762e+07	1.59557e+07
P14618;P14618-3;B4DNK4;H3BU13;H3BN34;H3BQZ3;P30613-2;P30613	P14618;P14618-3;B4DNK4	Pyruvate kinase PKM;Pyruvate kinase	PKM	6.28922e+09	6.2997e+09	6.63269e+09	4.77516e+09	4.94184e+09	5.04859e+09
Q15149;Q15149-7;Q15149-8;Q15149-9;Q15149-5;Q15149-6;Q15149-2;E9PMV1;H0YDN1;A0A075B730;A0A087X1U6;E9PKG0;P58107;E9PIA2;E9PQ28	Q15149;Q15149-7;Q15149-8;Q15149-9;Q15149-5;Q15149-6;Q15149-2	Plectin	PLEC	7.5308e+08	7.63777e+08	7.78886e+08	8.52863e+08	8.62497e+08	8.43006e+08
O60664-4;O60664;O60664-3;K7ERZ3;K7EL96;O60664-2;K7ER39	O60664-4;O60664;O60664-3;K7ERZ3	Perilipin-3	PLIN3	1.33278e+08	1.4304e+08	1.42474e+08	8.77999e+07	8.59069e+07	8.78904e+07
O00469-2;E7ETU9;O00469;O00469-3;C9JXZ0;F8WEW3	O00469-2;E7ETU9;O00469;O00469-3	Procollagen-lysine,2-oxoglutarate 5-dioxygenase 2	PLOD2	1.20457e+08	1.22354e+08	1.18799e+08	1.21705e+08	1.24055e+08	1.22239e+08
A0A0A0MSQ0;P13797-2;P13797;P13797-3;P13796;H7C4N2;U3KQI3;Q5TBN3;Q14651;C9JAM8	A0A0A0MSQ0;P13797-2;P13797;P13797-3	Plastin-3	PLS3	1.33886e+08	1.14114e+08	1.23551e+08	8.57994e+07	8.03831e+07	7.8479e+07
Q9H488;Q9H488-2	Q9H488;Q9H488-2	GDP-fucose protein O-fucosyltransferase 1	POFUT1	1.74202e+07	2.10317e+07	2.36346e+07	1.58584e+07	1.21804e+07	1.48317e+07
Q15181;Q5SQT6	Q15181;Q5SQT6	Inorganic pyrophosphatase	PPA1	5.46287e+07	5.5711e+07	5.45181e+07	5.04427e+07	4.75145e+07	4.94805e+07
P62937;F8WE65;C9J5S7;E5RIZ5;P0DN26;A0A0H2UH34;A0A0B4J2A2;A0A075B767;A0A075B759;Q9Y536;F5H284;P0DN37	P62937;F8WE65;C9J5S7	Peptidyl-prolyl cis-trans isomerase A;Peptidyl-prolyl cis-trans isomerase A, N-terminally processed;Peptidyl-prolyl cis-trans isomerase	PPIA	7.75995e+08	7.15467e+08	7.58192e+08	1.11483e+09	1.09197e+09	1.02162e+09
P23284	P23284	Peptidyl-prolyl cis-trans isomerase B	PPIB	2.79009e+08	2.51006e+08	2.61283e+08	2.79146e+08	2.71072e+08	2.7535e+08
P62140;E7ETD8;C9J9S3;C9JP48;H0Y3Y6;F8WE71;F8W1A0	P62140;E7ETD8;C9J9S3;C9JP48	Serine/threonine-protein phosphatase PP1-beta catalytic subunit;Serine/threonine-protein phosphatase	PPP1CB	6.0781e+07	6.18292e+07	7.06727e+07	7.68332e+07	6.98278e+07	7.64489e+07
P30153;B3KQV6;C9J9C1;E9PH38;P30154-5;P30154-4;P30154;P30154-2;P30154-3;H0YDG7;M0QXG4;M0R0K6;E9PPI5;E9PNM7;E9PHZ6	P30153;B3KQV6	Serine/threonine-protein phosphatase 2A 65 kDa regulatory subunit A alpha isoform	PPP2R1A	1.03019e+08	8.96111e+07	1.21642e+08	8.25196e+07	6.9452e+07	7.41604e+07
P30048-2;P30048	P30048-2;P30048	Thioredoxin-dependent peroxide reductase, mitochondrial	PRDX3	4.59532e+07	4.1803e+07	3.0648e+07	3.02426e+07	2.93415e+07	3.23532e+07
Q13162;H7C3T4;A6NG45;A6NJJ0	Q13162;H7C3T4	Peroxiredoxin-4	PRDX4	6.13062e+07	7.42877e+07	6.67905e+07	5.33298e+07	5.24179e+07	5.41264e+07
P30044-2;P30044;P30044-3;P30044-4	P30044-2;P30044;P30044-3	Peroxiredoxin-5, mitochondrial	PRDX5	1.37974e+07	1.79299e+07	1.24495e+07	1.59961e+07	1.56155e+07	1.49442e+07
P10644;K7EM13;P10644-2;K7EPB2	P10644;K7EM13;P10644-2	cAMP-dependent protein kinase type I-alpha regulatory subunit;cAMP-dependent protein kinase type I-alpha regulatory subunit, N-terminally processed	PRKAR1A	1.65575e+07	1.70824e+07	2.35105e+07	1.69683e+07	1.54957e+07	1.70209e+07
K7ELL7;P14314-2;P14314;A0A0C4DGP4;K7EPW7;K7EKX1;K7EJ70;K7EIP3	K7ELL7;P14314-2;P14314	Glucosidase 2 subunit beta	PRKCSH	1.71183e+08	1.61484e+08	1.71696e+08	1.19838e+08	1.22e+08	1.3883e+08
P78527;P78527-2;F5GX40;H0YG84	P78527;P78527-2	DNA-dependent protein kinase catalytic subunit	PRKDC	1.23277e+08	1.02096e+08	1.24559e+08	1.65704e+08	1.74471e+08	1.91675e+08
Q99873-4;E9PKG1;H7C2I1;Q99873-3;Q99873-2;Q99873;E9PQ98;E9PIX6;H0YDE4;A0A087X1W2;E9PNR9;E9PMW9	Q99873-4;E9PKG1;H7C2I1;Q99873-3;Q99873-2;Q99873;E9PQ98;E9PIX6;H0YDE4;A0A087X1W2;E9PNR9	Protein arginine N-methyltransferase 1	PRMT1	1.6677e+07	1.37298e+07	1.8486e+07	1.9027e+07	1.70166e+07	1.88867e+07
P25786;P25786-2;F5GX11;B4DEV8	P25786;P25786-2;F5GX11	Proteasome subunit alpha type-1	PSMA1	5.16788e+07	4.91317e+07	5.55756e+07	5.29727e+07	5.56413e+07	5.09389e+07
A0A024RA52;P25787;C9JCK5;H7C402;H3BT36	A0A024RA52;P25787;C9JCK5	Proteasome subunit alpha type;Proteasome subunit alpha type-2	PSMA2	3.24912e+07	3.38563e+07	3.86033e+07	2.91826e+07	2.91887e+07	3.91964e+07
P25789;H0YMZ1;H0YN18;H0YL69;H0YMA1;H0YLC2;H0YKT8;P25789-2;H0YMI6;H0YKS0;H0YMV3;H0YLS6	P25789;H0YMZ1;H0YN18;H0YL69;H0YMA1;H0YLC2;H0YKT8;P25789-2;H0YMI6	Proteasome subunit alpha type-4;Proteasome subunit alpha type;Proteasome subunit beta type	PSMA4	5.10824e+07	5.50418e+07	4.95954e+07	4.48278e+07	4.70107e+07	5.23143e+07
P28066;P28066-2	P28066;P28066-2	Proteasome subunit alpha type-5	PSMA5	3.65271e+07	4.47767e+07	3.67789e+07	3.28348e+07	4.17749e+07	3.97792e+07
G3V5Z7;P60900;G3V295;P60900-2;G3V3I1;G3V3U4;P60900-3;H0YJC4;G3V4S5;G3V2S7	G3V5Z7;P60900;G3V295;P60900-2;G3V3I1	Proteasome subunit alpha type;Proteasome subunit alpha type-6	PSMA6	4.34499e+07	4.42153e+07	4.4662e+07	3.53556e+07	3.49635e+07	3.99474e+07
O14818;O14818-2;H0Y586;Q8TAA3-2;Q8TAA3-5;Q8TAA3;A0A087WYS6;O14818-4;F5GY34	O14818;O14818-2;H0Y586;Q8TAA3-2;Q8TAA3-5;Q8TAA3	Proteasome subunit alpha type-7;Proteasome subunit alpha type-7-like	PSMA7;PSMA8	4.43588e+07	4.71282e+07	4.43693e+07	4.41249e+07	5.02145e+07	4.67167e+07
P20618	P20618	Proteasome subunit beta type-1	PSMB1	2.57508e+07	2.66195e+07	2.26683e+07	2.79615e+07	2.64939e+07	2.17843e+07
P49721;A0A087WVV1	P49721;A0A087WVV1	Proteasome subunit beta type-2	PSMB2	3.48048e+07	1.99846e+07	2.42106e+07	2.75341e+07	2.76596e+07	2.77549e+07
P28070	P28070	Proteasome subunit beta type-4	PSMB4	2.9012e+07	3.23022e+07	3.03383e+07	2.58977e+07	2.78351e+07	2.80174e+07
P62191;P62191-2;G3V4X1	P62191;P62191-2	26S protease regulatory subunit 4	PSMC1	6.39457e+07	6.7955e+07	9.09374e+07	2.99967e+07	4.39545e+07	2.9785e+07
P35998;A0A1W2PQS1;P35998-2;C9JLS9	P35998;A0A1W2PQS1;P35998-2	26S protease regulatory subunit 7	PSMC2	4.28283e+07	5.59501e+07	5.19756e+07	2.31913e+07	2.38941e+07	2.4982e+07
R4GNH3;P17980;E9PM69;E9PKD5;E9PN50;E9PMD8;E9PLG2	R4GNH3;P17980;E9PM69;E9PKD5;E9PN50;E9PMD8	26S protease regulatory subunit 6A	PSMC3	2.55234e+07	2.60004e+07	2.4445e+07	2.7228e+07	2.34904e+07	2.42887e+07
P43686;P43686-2	P43686;P43686-2	26S protease regulatory subunit 6B	PSMC4	4.06479e+07	5.38804e+07	4.39121e+07	4.34281e+07	4.19731e+07	4.01005e+07
P62195;P62195-2;J3QQM1;J3QSA9;J3QLH6;J3KRP2;J3QSE0;J3QRR3;J3QRW1;J3KTQ9;Q8NB90-3;Q8NB90-2;Q8NB90	P62195;P62195-2;J3QQM1;J3QSA9	26S protease regulatory subunit 8	PSMC5	4.19362e+07	3.88901e+07	4.43735e+07	3.91129e+07	4.28497e+07	3.57475e+07
A0A087X2I1;P62333;H0YJS8;H0YJC0;H0YJX2	A0A087X2I1;P62333	26S protease regulatory subunit 10B	PSMC6	2.90581e+07	3.10982e+07	3.32011e+07	3.23217e+07	2.49555e+07	2.86174e+07
Q99460-2;Q99460;A0A087WW66;H7C378;C9J9M4;H7BZR6;F8WCE3	Q99460-2;Q99460;A0A087WW66	26S proteasome non-ATPase regulatory subunit 1	PSMD1	3.80607e+07	3.94185e+07	4.53897e+07	3.67196e+07	4.44408e+07	3.47704e+07
O00231;O00231-2;J3QRY4;J3KSW3;J3QS13	O00231;O00231-2	26S proteasome non-ATPase regulatory subunit 11	PSMD11	3.03035e+07	3.37848e+07	3.48378e+07	2.64088e+07	2.55275e+07	2.79657e+07
O00232;O00232-2;J3KTJ5;J3KSK1	O00232;O00232-2	26S proteasome non-ATPase regulatory subunit 12	PSMD12	2.16814e+07	2.64434e+07	2.26503e+07	1.84914e+07	2.01213e+07	2.5133e+07
Q9UNM6;J3KNQ3;Q9UNM6-2;A0A087WUL9;H0YD73;E9PL38;E9PPD2;E9PQG3	Q9UNM6;J3KNQ3;Q9UNM6-2;A0A087WUL9;H0YD73	26S proteasome non-ATPase regulatory subunit 13	PSMD13	2.02872e+07	2.40407e+07	2.50931e+07	1.84802e+07	1.61968e+07	2.34718e+07
Q13200;Q13200-3;Q13200-2;H7C1H2;H7C2Q3;C9JPC0;F8WBS8	Q13200;Q13200-3;Q13200-2	26S proteasome non-ATPase regulatory subunit 2	PSMD2	1.13046e+08	1.21842e+08	1.29523e+08	6.1287e+07	5.37198e+07	6.24402e+07
O43242;O43242-2;F5H8K4;H0YGV8	O43242;O43242-2	26S proteasome non-ATPase regulatory subunit 3	PSMD3	3.29944e+07	3.62078e+07	3.1888e+07	2.84308e+07	2.78238e+07	3.27738e+07
Q5VWC4;P55036;P55036-2;H0Y3Y9;A6PVX3;H0Y561;A2A3N6	Q5VWC4;P55036;P55036-2	26S proteasome non-ATPase regulatory subunit 4	PSMD4	7.94654e+06	7.4593e+06	6.59472e+06	7.10622e+06	7.18639e+06	7.43378e+06
P51665;H3BNT7;H3BTM8;H3BQV2	P51665;H3BNT7;H3BTM8	26S proteasome non-ATPase regulatory subunit 7	PSMD7	3.41947e+07	3.7289e+07	3.67131e+07	3.2591e+07	3.67714e+07	3.26623e+07
Q06323;Q06323-3;Q06323-2;H0YKK6;H0YLU2	Q06323;Q06323-3;Q06323-2	Proteasome activator complex subunit 1	PSME1	2.15525e+07	2.37066e+07	2.93296e+07	2.42277e+07	2.58837e+07	2.41651e+07
A0A087X1Z3;Q9UL46;H0YM70;H0YKU2	A0A087X1Z3;Q9UL46;H0YM70	Proteasome activator complex subunit 2	PSME2	3.36695e+07	4.7901e+07	4.50747e+07	4.65916e+07	4.59585e+07	4.32525e+07
A0A0U1RRM4;P26599;P26599-2;P26599-3;A6NLN1;K7EKJ7;A0A0D9SF20;K7EK45;A0A087WU68;K7ELW5;K7ES59;A0A087WUW5;O95758-1;O95758-6;O95758-2;O95758;O95758-5;O95758-4;X6R242;O95758-7	A0A0U1RRM4;P26599;P26599-2;P26599-3;A6NLN1	Polypyrimidine tract-binding protein 1	PTBP1	2.07296e+08	1.88809e+08	2.18272e+08	2.37962e+08	2.72507e+08	2.7237e+08
A0A087WYT3;Q15185-4;Q15185;Q15185-3;B4DDC6;Q15185-2	A0A087WYT3;Q15185-4;Q15185;Q15185-3	Prostaglandin E synthase 3	PTGES3	5.70712e+07	5.54634e+07	6.31268e+07	3.79152e+07	3.55634e+07	3.98674e+07
Q6NZI2;Q6NZI2-2;Q6NZI2-3	Q6NZI2;Q6NZI2-2	Polymerase I and transcript release factor	PTRF	6.60004e+07	6.90437e+07	7.5991e+07	4.19285e+07	2.93777e+07	4.05859e+07
A0A0J9YYL3;A0A0J9YXJ8;A0A0J9YVP6;A0A0J9YXX5;Q9UHX1-4;Q9UHX1-6;Q9UHX1-3;Q9UHX1-5;Q9UHX1-2;Q9UHX1;A0A0J9YVR6;E9PQ56;A0A0J9YWM1;H0YEM1;E9PMU7;E9PN18;E9PL19;H0YCP8	A0A0J9YYL3;A0A0J9YXJ8;A0A0J9YVP6;A0A0J9YXX5;Q9UHX1-4;Q9UHX1-6;Q9UHX1-3;Q9UHX1-5;Q9UHX1-2;Q9UHX1;A0A0J9YVR6;E9PQ56;A0A0J9YWM1;H0YEM1;E9PMU7;E9PN18	Poly(U)-binding-splicing factor PUF60	PUF60	1.04438e+07	2.28271e+07	2.1947e+07	2.40492e+07	2.74077e+07	2.95306e+07
P11216;H0Y4Z6;P11217;P11217-2	P11216	Glycogen phosphorylase, brain form	PYGB	2.35149e+07	2.17245e+07	2.51599e+07	4.49778e+07	5.42072e+07	5.84754e+07
P47897-2;P47897;A0A1B0GVU9;B4DDN1;H7C0R3;A0A0U1RQX5;A0A1B0GTT3;A0A0U1RQQ5;C9J165;A0A0U1RQT0;A0A0U1RQX9;A0A0U1RQM8;A0A0U1RRI9;A0A0U1RQE9;A0A0U1RRC8;A0A0U1RQU2;F2Z2V6;A0A0U1RQL2;A0A0U1RQC3;A0A0U1RRJ7;A0A0U1RQJ6;A0A0U1RR66	P47897-2;P47897;A0A1B0GVU9;B4DDN1;H7C0R3	Glutamine--tRNA ligase	QARS	2.23052e+07	1.81519e+07	2.76664e+07	3.335e+07	3.42139e+07	3.68887e+07
Q15907;Q15907-2;H3BMH2;H3BSC1;P62491-2;P62491;B4DQU5;M0R2D0;P57735	Q15907;Q15907-2;H3BMH2;H3BSC1;P62491-2;P62491	Ras-related protein Rab-11B;Ras-related protein Rab-11A	RAB11B;RAB11A	1.98323e+07	1.87902e+07	1.83003e+07	1.48515e+07	1.72644e+07	1.8084e+07
P61106;X6RFL8	P61106;X6RFL8	Ras-related protein Rab-14	RAB14	1.8719e+07	1.20977e+07	1.5132e+07	1.34773e+07	1.44054e+07	1.25878e+07
P62820;E7END7;P62820-2;P62820-3	P62820;E7END7;P62820-2;P62820-3	Ras-related protein Rab-1A	RAB1A	8.85257e+07	1.01252e+08	9.15219e+07	7.25567e+07	6.62781e+07	5.60531e+07
P61019;E9PKL7;P61019-2;E9PE37;H0YD31;H0YDL5;Q6PIK3	P61019;E9PKL7;P61019-2	Ras-related protein Rab-2A	RAB2A	1.48404e+07	1.37404e+07	1.51373e+07	1.51034e+07	1.29651e+07	1.42965e+07
P51148;P51148-2;F8VVK3;K7ERI8;K7ERQ8;F8VWU4;F8VVZ0;F8VUA5;K7ENY4;F8VSF8;K7EIP6;F8WCY6;F8WD79;F8VPW9;F8VWZ7	P51148;P51148-2;F8VVK3;K7ERI8;K7ERQ8	Ras-related protein Rab-5C	RAB5C	4.37602e+07	5.05096e+07	4.61057e+07	3.76724e+07	4.04966e+07	3.55488e+07
P51149;C9J8S3;C9J4V0;C9J592;C9J4S4;C9IZZ0;C9J7D1	P51149;C9J8S3;C9J4V0;C9J592;C9J4S4;C9IZZ0	Ras-related protein Rab-7a	RAB7A	4.3214e+07	3.94473e+07	4.18469e+07	1.56217e+07	1.65633e+07	1.778e+07
P63000;P63000-2;P60763;J3KSC4;J3QLK0	P63000;P63000-2;P60763	Ras-related C3 botulinum toxin substrate 1;Ras-related C3 botulinum toxin substrate 3	RAC1;RAC3	2.07401e+07	1.72649e+07	2.19714e+07	1.67255e+07	1.67574e+07	1.67462e+07
P54727;P54727-2;Q5W0S5;H0Y579;Q5W0S4	P54727;P54727-2	UV excision repair protein RAD23 homolog B	RAD23B	3.66655e+07	4.32418e+07	4.43247e+07	2.87481e+07	2.91164e+07	3.22498e+07
Q9UKM9;Q5QPM1;Q5QPL9;Q9UKM9-2;Q5QPM2;Q5QPM0	Q9UKM9;Q5QPM1;Q5QPL9;Q9UKM9-2;Q5QPM2	RNA-binding protein Raly	RALY	1.76571e+07	1.75264e+07	2.01417e+07	2.26128e+07	1.73728e+07	2.19273e+07
B5MDF5;P62826;J3KQE5;F5H018;B4DV51;H0YFC6;A0A087X0W0	B5MDF5;P62826;J3KQE5;F5H018;B4DV51	GTP-binding nuclear protein Ran	RAN	2.03428e+08	1.90603e+08	1.96888e+08	1.53697e+08	1.65675e+08	1.52614e+08
P61224;E7ESV4;F5H7Y6;P61224-3;F5H004;F5GX62;P61224-2;A6NIZ1;F5H6R7;P61224-4;F5H077;F5GWU8;F5H491;F5H0B7;F5H500;F5H823;B7ZB78;F5GZG1;F5GYB5;F5H4H0;F5GYH7;F8WBC0;O95716	P61224;E7ESV4;F5H7Y6;P61224-3;F5H004;F5GX62;P61224-2;A6NIZ1;F5H6R7;P61224-4;F5H077;F5GWU8;F5H491;F5H0B7;F5H500;F5H823;B7ZB78;F5GZG1;F5GYB5	Ras-related protein Rap-1b;Ras-related protein Rap-1b-like protein	RAP1B	4.85298e+07	4.34361e+07	4.34825e+07	3.8311e+07	3.94197e+07	3.96981e+07
P54136;P54136-2;E5RJM9;E5RH09	P54136;P54136-2	Arginine--tRNA ligase, cytoplasmic	RARS	2.59165e+07	2.69013e+07	2.87918e+07	3.02528e+07	3.05279e+07	2.40364e+07
Q09028-3;Q09028;Q09028-2;Q09028-4;H0YCT5;H0YF10;H0YDK2;H0YEU5;E9PNS6;E9PNS2;E9PIC4;C9JPP3	Q09028-3;Q09028;Q09028-2;Q09028-4;H0YCT5;H0YF10;H0YDK2	Histone-binding protein RBBP4	RBBP4	2.91326e+07	2.55179e+07	2.79294e+07	3.93149e+07	3.53538e+07	3.55529e+07
Q9Y5S9-2;Q9Y5S9;A0A0J9YW13	Q9Y5S9-2;Q9Y5S9	RNA-binding protein 8A	RBM8A	2.08627e+07	2.29039e+07	1.98182e+07	2.05684e+07	1.81833e+07	2.11732e+07
P38159;P38159-2;H0Y6E7;H3BT71;Q96E39;H3BUY5;H3BR27;P38159-3;A0A1B0GUK8;H3BNC1;O75526;Q8N7X1	P38159;P38159-2;H0Y6E7;H3BT71;Q96E39	RNA-binding motif protein, X chromosome;RNA-binding motif protein, X chromosome, N-terminally processed;RNA binding motif protein, X-linked-like-1	RBMX;RBMXL1	5.37618e+07	5.21182e+07	4.267e+07	5.29972e+07	4.375e+07	5.96977e+07
Q15293;Q15293-2;E9PP27	Q15293;Q15293-2	Reticulocalbin-1	RCN1	2.10032e+08	1.90827e+08	1.91627e+08	1.83639e+08	1.85767e+08	1.84317e+08
P61586;C9JNR4;C9JX21;Q5JR07;Q5JR05;U3KQA9;U3KQV3;C9JRM1;Q5JR06;E9PN11;E9PLA2;P62745	P61586;C9JNR4;C9JX21;Q5JR07;Q5JR05	Transforming protein RhoA	RHOA;RHOC	2.19068e+08	2.02952e+08	2.18802e+08	1.45046e+08	1.46098e+08	1.47547e+08
P13489;E9PIM9;E9PMJ3;E9PLZ3;H0YCR7;E9PIK5;E9PMN0;E9PMA9;E9PR82;E9PMI1	P13489	Ribonuclease inhibitor	RNH1	1.92578e+08	1.73076e+08	1.85475e+08	2.77238e+08	2.95697e+08	3.01752e+08
X1WI28;P27635;B8A6G2;A6QRI9	X1WI28;P27635	60S ribosomal protein L10	RPL10	1.17197e+08	8.76973e+07	1.14386e+08	1.15819e+08	1.04695e+08	1.08425e+08
P62906	P62906	60S ribosomal protein L10a	RPL10A	8.67782e+07	7.80268e+07	8.49625e+07	9.80729e+07	9.86861e+07	9.80407e+07
P62913;P62913-2;Q5VVC8;Q5VVC9	P62913;P62913-2;Q5VVC8;Q5VVC9	60S ribosomal protein L11	RPL11	7.4549e+07	6.24665e+07	6.81938e+07	9.28446e+07	7.39609e+07	7.8032e+07
P30050;P30050-2	P30050;P30050-2	60S ribosomal protein L12	RPL12	8.03114e+07	8.61688e+07	8.59574e+07	8.42212e+07	9.1439e+07	8.83587e+07
P26373;J3QSB4;P26373-2;H3BTH3	P26373;J3QSB4;P26373-2	60S ribosomal protein L13	RPL13	9.02438e+07	9.01683e+07	7.98329e+07	9.81464e+07	8.77654e+07	9.51857e+07
P40429;M0QYS1;Q8J015;Q6NVV1;M0QZU1;A0A096LPE0	P40429;M0QYS1;Q8J015	60S ribosomal protein L13a	RPL13A;RPL13a	4.83998e+07	5.50332e+07	5.16118e+07	5.6277e+07	5.38634e+07	5.54713e+07
E7EPB3;P50914	E7EPB3;P50914	60S ribosomal protein L14	RPL14	4.98087e+07	6.6767e+07	6.59949e+07	5.94518e+07	6.17423e+07	6.79527e+07
E7EQV9;P61313;E7ENU7;E7EX53;P61313-2;E7ERA2	E7EQV9;P61313;E7ENU7;E7EX53	Ribosomal protein L15;60S ribosomal protein L15	RPL15	9.69548e+07	9.80552e+07	8.36196e+07	8.02885e+07	5.68638e+07	7.51658e+07
A0A087WXM6;J3QQT2;J3KRX5;A0A0A6YYL6;P18621;P18621-3;J3QLC8;A0A0A0MRF8;P18621-2;J3KRB3;A0A087WWH0;J3QS96;A0A087WY81;J3KSJ0	A0A087WXM6;J3QQT2;J3KRX5;A0A0A6YYL6;P18621;P18621-3;J3QLC8;A0A0A0MRF8;P18621-2;J3KRB3;A0A087WWH0;J3QS96;A0A087WY81	60S ribosomal protein L17	RPL17;RPL17-C18orf32	4.80581e+07	5.56651e+07	5.38234e+07	4.94256e+07	4.92058e+07	5.56538e+07
J3QQ67;Q07020;G3V203;H0YHA7;Q07020-2;F8VUA6;F8VYV2;A0A075B7A0;F8VXR6	J3QQ67;Q07020;G3V203;H0YHA7;Q07020-2;F8VUA6;F8VYV2;A0A075B7A0	60S ribosomal protein L18	RPL18	4.44154e+07	9.26692e+07	3.4264e+07	9.46646e+07	1.05883e+08	7.22145e+07
M0R117;Q02543;M0R3D6;M0R1A7;M0R0P7	M0R117;Q02543;M0R3D6;M0R1A7;M0R0P7	60S ribosomal protein L18a	RPL18A	6.58505e+07	5.87264e+07	6.224e+07	5.84459e+07	5.36785e+07	6.55264e+07
J3QR09;J3KTE4;P84098;J3QL15	J3QR09;J3KTE4;P84098	Ribosomal protein L19;60S ribosomal protein L19	RPL19	3.73406e+07	3.53058e+07	3.09227e+07	3.27297e+07	2.54356e+07	3.151e+07
P35268;K7EJT5;K7EP65;K7EKS7;K7ELC4;K7EMH1;K7ERI7	P35268;K7EJT5;K7EP65;K7EKS7;K7ELC4;K7EMH1;K7ERI7	60S ribosomal protein L22	RPL22	6.99178e+07	7.17645e+07	1.45889e+08	9.15e+07	8.9056e+07	1.01655e+08
P62829;J3KTJ3;C9JD32;J3KT29;B9ZVP7;J3QQT9	P62829;J3KTJ3;C9JD32;J3KT29	60S ribosomal protein L23	RPL23	6.45307e+07	6.3552e+07	6.6415e+07	6.96544e+07	6.31249e+07	6.1896e+07
H7BY10;K7EJV9;K7ERT8;A8MUS3;P62750;K7EMA7	H7BY10;K7EJV9;K7ERT8;A8MUS3;P62750;K7EMA7	60S ribosomal protein L23a	RPL23A	4.26574e+07	4.14134e+07	4.12805e+07	4.32568e+07	4.36633e+07	4.40369e+07
C9JXB8;C9JNW5;P83731	C9JXB8;C9JNW5;P83731	60S ribosomal protein L24	RPL24	3.27879e+07	2.80103e+07	3.66771e+07	3.56617e+07	3.16729e+07	3.52366e+07
P61353;K7ELC7;K7EQQ9;K7ERY7	P61353;K7ELC7;K7EQQ9	60S ribosomal protein L27	RPL27	7.16589e+07	7.73618e+07	7.73593e+07	7.10999e+07	7.12186e+07	7.87607e+07
P46776;E9PJD9;E9PLL6;E9PLX7	P46776;E9PJD9;E9PLL6	60S ribosomal protein L27a	RPL27A	3.20195e+07	3.28669e+07	3.25e+07	3.14882e+07	3.14396e+07	3.15911e+07
P39023;G5E9G0;H7C422;H7C3M2;B5MCW2;F8WCR1;Q92901	P39023;G5E9G0;H7C422;H7C3M2;B5MCW2	60S ribosomal protein L3	RPL3	1.50585e+08	1.54141e+08	1.32334e+08	1.57002e+08	1.48318e+08	1.53405e+08
E5RI99;P62888;A0A0B4J213;E5RJH3;A0A0C4DH44	E5RI99;P62888	60S ribosomal protein L30	RPL30	5.14944e+07	6.48521e+07	5.78074e+07	5.35665e+07	5.22558e+07	6.38581e+07
P62899;H7C2W9;C9JU56;B7Z4E3;B7Z4C8;P62899-3;P62899-2;B8ZZK4	P62899;H7C2W9;C9JU56;B7Z4E3;B7Z4C8;P62899-3;P62899-2;B8ZZK4	60S ribosomal protein L31	RPL31	3.85828e+07	3.46131e+07	3.27949e+07	3.8109e+07	4.0889e+07	3.61154e+07
D3YTB1;F8W727;P62910;D3YTI8	D3YTB1;F8W727;P62910	60S ribosomal protein L32	RPL32	5.82463e+07	3.86809e+07	4.79555e+07	5.18516e+07	4.48331e+07	5.57196e+07
Q9Y3U8;J3QSB5;J3KTD3	Q9Y3U8;J3QSB5	60S ribosomal protein L36	RPL36	2.82793e+07	2.61936e+07	3.15517e+07	2.54346e+07	2.72734e+07	2.58637e+07
C9J4Z3;P61513;M0R0A1;Q6P4E4;E9PEL3;M0R2L6;G5E9R3;A6NKH3	C9J4Z3;P61513;M0R0A1;Q6P4E4;E9PEL3;M0R2L6	60S ribosomal protein L37a	RPL37A	1.86477e+07	1.74933e+07	1.56125e+07	1.74814e+07	1.62402e+07	1.63357e+07
P63173;J3KT73;J3QL01;J3KSP2	P63173;J3KT73;J3QL01;J3KSP2	60S ribosomal protein L38	RPL38	2.91242e+07	2.65586e+07	3.05398e+07	2.09908e+07	2.08337e+07	2.35722e+07
P36578;H3BM89;H3BTP7;H3BU31	P36578;H3BM89	60S ribosomal protein L4	RPL4	1.94245e+08	1.93805e+08	2.01258e+08	2.03093e+08	1.85075e+08	1.98415e+08
P46777;Q5T7N0	P46777	60S ribosomal protein L5	RPL5	1.04053e+08	9.87426e+07	1.0676e+08	1.18767e+08	1.11572e+08	1.12672e+08
Q02878;F8VZ45;U3KQR5;F8VR69;F8VZA3;F8VWR1;F8VU16	Q02878	60S ribosomal protein L6	RPL6	1.64527e+08	1.45847e+08	1.50344e+08	1.6243e+08	1.61937e+08	1.56222e+08
P18124;A8MUD9;C9JIJ5;C9JZ88	P18124;A8MUD9	60S ribosomal protein L7	RPL7	1.68258e+08	1.36454e+08	1.45454e+08	1.5487e+08	1.4711e+08	1.49584e+08
P62424;Q5T8U2;Q5T8U3	P62424;Q5T8U2;Q5T8U3	60S ribosomal protein L7a	RPL7A	1.19283e+08	1.0977e+08	1.06569e+08	1.12615e+08	1.12439e+08	1.07969e+08
P62917;E9PKU4;E9PKZ0;G3V1A1;E9PP36	P62917;E9PKU4;E9PKZ0;G3V1A1	60S ribosomal protein L8	RPL8	1.1899e+08	9.87468e+07	1.07492e+08	1.15482e+08	1.11933e+08	1.15874e+08
P32969;D6RAN4;H0Y9V9;E7ESE0;H0Y9R4	P32969;D6RAN4;H0Y9V9;E7ESE0;H0Y9R4	60S ribosomal protein L9	RPL9	6.00556e+07	5.37812e+07	5.89879e+07	6.37946e+07	5.46491e+07	5.5069e+07
P05388;F8VWS0;P05388-2;F8VU65;F8VPE8;G3V210;F8VW21;F8VQY6;F8VRK7;F8VZS0;Q8NHW5;F8VS58;F8VWV4;F8W1K8	P05388;F8VWS0;P05388-2;F8VU65;F8VPE8;G3V210;F8VW21;F8VQY6;F8VRK7;F8VZS0;Q8NHW5;F8VS58	60S acidic ribosomal protein P0;60S acidic ribosomal protein P0-like	RPLP0;RPLP0P6	2.1955e+08	2.04073e+08	2.20955e+08	1.90841e+08	1.87491e+08	1.89708e+08
P05386	P05386	60S acidic ribosomal protein P1	RPLP1	2.00378e+08	1.31384e+08	2.58462e+08	1.31855e+08	1.94791e+08	1.48682e+08
P05387;H0YDD8;P05386-2	P05387	60S acidic ribosomal protein P2	RPLP2	2.04204e+08	1.77356e+08	1.88975e+08	1.59237e+08	1.79417e+08	1.7033e+08
P04843;B7Z4L4;F8WF32	P04843;B7Z4L4	Dolichyl-diphosphooligosaccharide--protein glycosyltransferase subunit 1	RPN1	1.96604e+08	2.20105e+08	2.17858e+08	2.17651e+08	2.02483e+08	2.10719e+08
P04844;P04844-2;Q5JYR7;Q5JYR4;F2Z3K5;Q5JYR3;H0Y5M1	P04844;P04844-2	Dolichyl-diphosphooligosaccharide--protein glycosyltransferase subunit 2	RPN2	1.31852e+08	1.48121e+08	1.32652e+08	1.2148e+08	1.25397e+08	1.3207e+08
P46783;F6U211;A0A1W2PQS6;S4R435;Q9NQ39	P46783;F6U211;A0A1W2PQS6;S4R435	40S ribosomal protein S10	RPS10;RPS10-NUDT3	7.69706e+07	7.95916e+07	1.01523e+08	8.21462e+07	7.04587e+07	8.89019e+07
P62280;M0QZC5;M0R1H5;M0R1H6	P62280;M0QZC5	40S ribosomal protein S11	RPS11	6.71639e+07	6.82325e+07	6.86605e+07	6.60501e+07	7.25867e+07	7.27152e+07
P25398	P25398	40S ribosomal protein S12	RPS12	1.04974e+08	1.11584e+08	1.19934e+08	1.31968e+08	1.2327e+08	1.18459e+08
P62277;J3KMX5;E9PS50	P62277;J3KMX5	40S ribosomal protein S13	RPS13	9.07533e+07	8.70942e+07	8.6334e+07	9.36291e+07	8.41001e+07	8.71526e+07
P62263;E5RH77;H0YB22	P62263;E5RH77;H0YB22	40S ribosomal protein S14	RPS14	6.11657e+07	5.7358e+07	2.97464e+07	6.41363e+07	5.37353e+07	5.67605e+07
K7ELC2;P62841;K7EM56;A0A0B4J2B4;K7EJ78;S4R417;K7EQJ5;S4R456	K7ELC2;P62841;K7EM56;A0A0B4J2B4;K7EJ78;S4R417;K7EQJ5;S4R456	40S ribosomal protein S15	RPS15	5.8718e+07	7.42365e+07	6.4196e+07	7.06256e+07	6.79064e+07	5.60186e+07
P62244	P62244	40S ribosomal protein S15a	RPS15A	7.36653e+07	8.65221e+07	6.7778e+07	6.1031e+07	6.62007e+07	7.69942e+07
P62249;M0R3H0;M0R1M5;M0R210;Q6IPX4;M0QX76	P62249;M0R3H0;M0R1M5;M0R210;Q6IPX4	40S ribosomal protein S16	RPS16	6.16071e+07	6.81418e+07	7.30741e+07	5.80633e+07	6.31104e+07	6.80307e+07
P08708;H0YN88;A0A075B716;H0YN73;H3BNC9	P08708;H0YN88;A0A075B716	40S ribosomal protein S17	RPS17	4.91211e+07	6.06092e+07	7.68056e+07	5.99557e+07	6.52229e+07	7.14037e+07
P62269;J3JS69;A0A0G2JQH2;Q5GGW2	P62269	40S ribosomal protein S18	RPS18	6.16867e+07	5.60323e+07	5.7295e+07	6.46097e+07	6.55853e+07	6.2799e+07
P39019;M0R2L9;M0QXK4;M0QYF7;M0R140;A0A075B6E2	P39019;M0R2L9;M0QXK4;M0QYF7;M0R140	40S ribosomal protein S19	RPS19	4.97668e+07	4.4337e+07	5.61463e+07	4.98857e+07	5.40265e+07	5.95284e+07
P15880;H0YEN5;E9PQD7;E9PMM9;I3L404;E9PPT0;E9PM36;H3BNG3;H0YE27	P15880;H0YEN5;E9PQD7;E9PMM9;I3L404;E9PPT0	40S ribosomal protein S2	RPS2	1.22889e+08	1.38525e+08	1.49252e+08	1.31121e+08	1.39408e+08	1.35202e+08
P60866;P60866-2;E5RIP1;E5RJX2;G3XAN0	P60866;P60866-2;E5RIP1;E5RJX2;G3XAN0	40S ribosomal protein S20	RPS20	5.9305e+07	4.8361e+07	5.10401e+07	5.38674e+07	5.67874e+07	6.20835e+07
Q8WVC2;P63220;Q9BYK1;Q9BYK2	Q8WVC2;P63220;Q9BYK1	40S ribosomal protein S21	RPS21	2.86671e+07	2.54838e+07	2.46412e+07	2.69026e+07	3.11112e+07	2.82627e+07
E7ETK0;A0A087WUS0;P62847-2;P62847-3;P62847;P62847-4	E7ETK0;A0A087WUS0;P62847-2;P62847-3;P62847;P62847-4	40S ribosomal protein S24	RPS24	3.99665e+07	5.11821e+07	6.10404e+07	4.77383e+07	4.3718e+07	5.53264e+07
P62851	P62851	40S ribosomal protein S25	RPS25	4.15913e+07	3.8064e+07	4.62287e+07	3.8411e+07	3.74332e+07	4.5846e+07
P62979;J3QS39;J3QTR3;F5H6Q2;F5GYU3;F5H2Z3;F5H265;B4DV12;F5H388;F5H747;F5GXK7;J3QKN0;Q5PY61;Q96C32;P62987;P0CG47;P0CG48;M0R1V7;Q49A90;M0R1M6;M0R2S1;J3QSA3;F5GZ39	P62979;J3QS39;J3QTR3;F5H6Q2;F5GYU3;F5H2Z3;F5H265;B4DV12;F5H388;F5H747;F5GXK7;J3QKN0;Q5PY61;Q96C32;P62987;P0CG47;P0CG48;M0R1V7;Q49A90;M0R1M6;M0R2S1	Ubiquitin-40S ribosomal protein S27a;Ubiquitin;40S ribosomal protein S27a;Ubiquitin-60S ribosomal protein L40;Ubiquitin;60S ribosomal protein L40;Polyubiquitin-B;Ubiquitin;Polyubiquitin-C;Ubiquitin	RPS27A;UBB;UBC;UBA52	1.30458e+08	8.9071e+07	1.14365e+08	8.90578e+07	1.00276e+08	8.66408e+07
P23396;P23396-2;E9PL09;H0YEU2;E9PPU1;F2Z2S8;H0YCJ7;H0YF32;E9PQ96;E9PJH4;E9PK82;E9PSF4;E9PQX2;H0YES8;E9PJN9	P23396;P23396-2;E9PL09;H0YEU2;E9PPU1;F2Z2S8;H0YCJ7	40S ribosomal protein S3	RPS3	1.30573e+08	1.53725e+08	1.25344e+08	1.26714e+08	1.31871e+08	1.36053e+08
P61247;D6RG13;D6RAT0;H0Y8L7;E9PFI5;H0Y9Y4;D6RB09;D6R9B6;D6RAS7;D6RED7;D6RI02;D6RGE0	P61247;D6RG13;D6RAT0;H0Y8L7;E9PFI5;H0Y9Y4;D6RB09;D6R9B6	40S ribosomal protein S3a	RPS3A	1.01826e+08	1.24307e+08	1.14217e+08	1.11218e+08	1.17725e+08	1.10108e+08
P62701;C9JEH7;P22090	P62701	40S ribosomal protein S4, X isoform	RPS4X	1.57325e+08	1.44737e+08	1.55181e+08	1.43842e+08	1.47575e+08	1.52269e+08
M0R0F0;P46782;M0R0R2;M0QZN2	M0R0F0;P46782;M0R0R2	40S ribosomal protein S5;40S ribosomal protein S5, N-terminally processed	RPS5	9.55554e+07	1.03834e+08	1.06081e+08	9.66845e+07	1.05831e+08	1.13523e+08
P62753;A2A3R7;A2A3R5	P62753;A2A3R7;A2A3R5	40S ribosomal protein S6	RPS6	6.11102e+07	5.56768e+07	5.61219e+07	5.33104e+07	5.19863e+07	5.79109e+07
P62081;B5MCP9	P62081;B5MCP9	40S ribosomal protein S7	RPS7	1.02892e+08	1.04708e+08	1.19945e+08	1.06372e+08	1.12418e+08	1.09905e+08
P62241;Q5JR95	P62241;Q5JR95	40S ribosomal protein S8	RPS8	1.02123e+08	9.48562e+07	8.96868e+07	9.66355e+07	9.04127e+07	9.3859e+07
A0A024R4M0;P46781;B5MCT8;C9JM19;F2Z3C0;A8MXK4	A0A024R4M0;P46781;B5MCT8;C9JM19	40S ribosomal protein S9	RPS9	7.12847e+07	8.14349e+07	6.98336e+07	6.69887e+07	6.56906e+07	7.12496e+07
C9J9K3;A0A0C4DG17;P08865;F8WD59	C9J9K3;A0A0C4DG17;P08865	40S ribosomal protein SA	RPSA	2.7925e+08	2.66504e+08	2.89954e+08	2.48715e+08	2.59281e+08	2.70394e+08
A0A0A0MRV0;Q9P2E9-2;Q9P2E9;Q9P2E9-3;A0A087WVV2;F8W7S5;A0A087WU26;A2A2S5;V9GY78;E9PN67;Q8N4C6-6	A0A0A0MRV0;Q9P2E9-2;Q9P2E9;Q9P2E9-3;A0A087WVV2;F8W7S5	Ribosome-binding protein 1	RRBP1	1.67965e+08	9.99455e+07	9.51208e+07	4.07155e+08	3.78503e+08	3.55782e+08
Q9NQC3-2;F8W914;Q9NQC3-5;Q9NQC3;Q9NQC3-4;H7C106;Q9NQC3-3;Q9NQC3-6;A0A0U1RQR6	Q9NQC3-2;F8W914;Q9NQC3-5;Q9NQC3;Q9NQC3-4	Reticulon-4;Reticulon	RTN4	2.26312e+08	2.20959e+08	2.22143e+08	1.67622e+08	1.53378e+08	1.57246e+08
Q9Y265;Q9Y265-2;E7ETR0;H7C4G5;J3QLR1;H7C4I3	Q9Y265;Q9Y265-2;E7ETR0;H7C4G5	RuvB-like 1	RUVBL1	4.13376e+07	3.55012e+07	4.29373e+07	3.97464e+07	4.27062e+07	4.61744e+07
Q9Y230;Q9Y230-2;M0R0Y3;X6R2L4;M0QXI6;M0R0Z0;A0A1W2PS48	Q9Y230;Q9Y230-2;M0R0Y3	RuvB-like 2	RUVBL2	2.03732e+07	2.03187e+07	2.45161e+07	2.34677e+07	2.47758e+07	2.60816e+07
P06703;R4GN98	P06703;R4GN98	Protein S100-A6;Protein S100	S100A6	2.82499e+07	3.56549e+07	2.54177e+07	4.29211e+07	3.24349e+07	1.19918e+07
Q9NR31;Q5SQT8;Q9NR31-2;H0Y5E8	Q9NR31;Q5SQT8;Q9NR31-2	GTP-binding protein SAR1a	SAR1A	1.79936e+07	1.38472e+07	2.04812e+07	1e+07	1.5313e+07	1.46006e+07
P55735;P55735-2;P55735-4;P55735-3;A8MXL6;E7ERC8	P55735;P55735-2;P55735-4;P55735-3;A8MXL6	Protein SEC13 homolog	SEC13	4.10577e+07	4.11327e+07	4.04712e+07	3.75745e+07	2.98815e+07	3.61498e+07
O75396;A0A087X1A9	O75396	Vesicle-trafficking protein SEC22b	SEC22B	2.09718e+07	2.11715e+07	1.32768e+07	1.6041e+07	1.85385e+07	1.78965e+07
F5H365;Q15436;Q15436-2;G3V4V1;G3V1W4;G3V3G5;G3V2R6;G3V5X8;G3V4Q2;Q5QPE2;Q15437;G3V5K1	F5H365;Q15436;Q15436-2	Protein transport protein Sec23A	SEC23A	3.49327e+07	2.87212e+07	2.60785e+07	2.30229e+07	2.91443e+07	2.0855e+07
D6REX3;O94979-3;O94979-9;O94979-2;O94979;O94979-8;O94979-6;O94979-10;O94979-4;H7BXG7;O94979-7;D6RHZ5;H0YAB3;O94979-5;H0Y8V7;H0Y9K1;H0Y8W8;H0YAF5;H0Y9V3;H0Y9T9	D6REX3;O94979-3;O94979-9;O94979-2;O94979;O94979-8;O94979-6;O94979-10;O94979-4;H7BXG7;O94979-7;D6RHZ5	Protein transport protein Sec31A	SEC31A	1.31904e+08	1.4257e+08	1.41456e+08	1.24388e+08	1.41597e+08	1.25726e+08
B4DR61;P61619;P61619-3;H7C1Q9;C9JXC6;H7C069;A6NK38;F2Z2C7;A6NIF9;C9JJV4;F8W776;Q8TC24;Q9H9S3-2;Q9H9S3-3;Q9H9S3	B4DR61;P61619;P61619-3	Protein transport protein Sec61 subunit alpha isoform 1	SEC61A1	1.40458e+07	1.21917e+07	1.25354e+07	1.11636e+07	1.04458e+07	9.81532e+06
P60468;S4R3B5	P60468	Protein transport protein Sec61 subunit beta	SEC61B	1.76393e+07	1.86536e+07	1.76745e+07	1.70591e+07	1.73243e+07	1.58918e+07
Q8NC51-4;Q8NC51-3;Q8NC51-2;Q8NC51	Q8NC51-4;Q8NC51-3;Q8NC51-2;Q8NC51	Plasminogen activator inhibitor 1 RNA-binding protein	SERBP1	2.51848e+08	2.30384e+08	1.0973e+08	3.2488e+08	2.96988e+08	2.89559e+08
A0A024QZX5;A0A087X1N8;P35237	A0A024QZX5;A0A087X1N8;P35237	Serpin B6	SERPINB6	2.23523e+07	2.29616e+07	2.49234e+07	2.7984e+07	3.15728e+07	3.83572e+07
P50454;E9PR70;E9PPV6;E9PKH2;E9PK86;E9PMI5;E9PNX1;E9PQ34;E9PJH8;E9PIG2;E9PRS3;H0YEP8;E9PLA6	P50454;E9PR70;E9PPV6;E9PKH2;E9PK86;E9PMI5	Serpin H1	SERPINH1	1.32575e+08	1.356e+08	1.21164e+08	2.29036e+08	2.3351e+08	2.57897e+08
Q01105-2;A0A0C4DFV9;Q01105-3;Q01105-4;Q01105;A0A087X027;P0DME0	Q01105-2;A0A0C4DFV9;Q01105-3;Q01105-4;Q01105;A0A087X027;P0DME0	Protein SET;Protein SETSIP	SET;SETSIP	1.55669e+08	1.51451e+08	1.70052e+08	1.48525e+08	1.52572e+08	1.39236e+08
Q15637-4;Q15637-6;Q15637-3;Q15637-2;Q15637;Q15637-7;Q15637-5;F8WEV5;C9J792;H7C561	Q15637-4;Q15637-6;Q15637-3;Q15637-2;Q15637;Q15637-7;Q15637-5	Splicing factor 1	SF1	3.34515e+07	3.05186e+07	2.68475e+07	2.72607e+07	2.68883e+07	3.76326e+07
E9PPJ0;Q13435;E9PJT3;E9PJ04;H0YCG1;H0YEX5;E9PIL8	E9PPJ0;Q13435;E9PJT3;E9PJ04;H0YCG1	Splicing factor 3B subunit 2	SF3B2	2.40243e+07	1.83291e+07	1.70975e+07	1.71172e+07	2.31187e+07	1.75712e+07
P23246;P23246-2;H0Y9K7;H0Y9U2	P23246;P23246-2	Splicing factor, proline- and glutamine-rich	SFPQ	1.86299e+08	1.61527e+08	1.93451e+08	2.25781e+08	2.28007e+08	2.24502e+08
Q5T123;Q9H299	Q5T123;Q9H299	SH3 domain-binding glutamic acid-rich-like protein 3	SH3BGRL3	2.23985e+08	2.39382e+08	2.31064e+08	6.40976e+07	5.31809e+07	5.52859e+07
P34897-3;P34897;P34897-2;H0YIZ0;G3V5L0;G3V2Y4;G3V4W5;G3V540;G3V2W0;G3V241;G3V3Y8;G3V4T0;G3V4X0;G3V2E4;G3V2D2;G3V2Y1;G3V3C6;P34896-4;P34896-3;P34896-2;P34896	P34897-3;P34897;P34897-2;H0YIZ0	Serine hydroxymethyltransferase, mitochondrial;Serine hydroxymethyltransferase	SHMT2	3.73175e+07	3.94569e+07	3.94158e+07	6.84118e+07	6.95966e+07	6.40355e+07
E5RJR5;P63208;E7ERH2;F8W8N3;P63208-2;E5RGM3;E5RI56	E5RJR5;P63208;E7ERH2;F8W8N3;P63208-2;E5RGM3	S-phase kinase-associated protein 1	SKP1	1.23319e+07	1.31171e+07	1.25365e+07	1.86342e+07	1.76567e+07	1.50729e+07
O15427;J3QQS9;J3QQV2;J3QSC3;J3KTI8	O15427	Monocarboxylate transporter 4	SLC16A3	1.3421e+07	1.31875e+07	1.25566e+07	1.17441e+07	1.06058e+07	1.17212e+07
Q00325-2;F8VVM2;Q00325;F8VWQ0;F8VZL5;F8VWR4	Q00325-2;F8VVM2;Q00325	Phosphate carrier protein, mitochondrial	SLC25A3	2.84208e+07	2.57464e+07	3.08305e+07	4.08145e+07	4.84954e+07	5.1018e+07
P05141;Q9H0C2	P05141	ADP/ATP translocase 2;ADP/ATP translocase 2, N-terminally processed	SLC25A5	1.02583e+08	1.13399e+08	1.02156e+08	1.37497e+08	1.32242e+08	1.41405e+08
P52788;P52788-2;H7C2R7	P52788;P52788-2	Spermine synthase	SMS	7.65345e+07	8.57632e+07	8.44003e+07	4.81984e+07	4.46834e+07	4.72862e+07
Q7KZF4;H7C597	Q7KZF4	Staphylococcal nuclease domain-containing protein 1	SND1	1.86561e+08	2.01437e+08	2.05087e+08	1.42026e+08	1.41215e+08	1.45215e+08
P08621-2;P08621;P08621-3;M0QYR1;P08621-4;M0QX04	P08621-2;P08621;P08621-3;M0QYR1	U1 small nuclear ribonucleoprotein 70 kDa	SNRNP70	1.5439e+07	1.38973e+07	1.29417e+07	1.67071e+07	1.76216e+07	1.94654e+07
P62318-2;P62318;H3BT13	P62318-2;P62318;H3BT13	Small nuclear ribonucleoprotein Sm D3	SNRPD3	2.2085e+07	2.16188e+07	2.41438e+07	2.40064e+07	2.41181e+07	2.65144e+07
P62304;A6NHK2	P62304;A6NHK2	Small nuclear ribonucleoprotein E	SNRPE	2.12317e+07	1.86749e+07	3.86775e+07	2.8491e+07	3.58008e+07	3.12323e+07
P00441;H7BYH4	P00441;H7BYH4	Superoxide dismutase [Cu-Zn]	SOD1	1.57587e+08	1.52881e+08	1.7386e+08	2.27771e+08	2.7068e+08	2.44935e+08
Q13813-3;Q13813;A0A0D9SF54;A0A0D9SGF6;Q13813-2;A0A1B0GTB7;A0A1B0GUH3;A0A0D9SFF6	Q13813-3;Q13813;A0A0D9SF54;A0A0D9SGF6;Q13813-2	Spectrin alpha chain, non-erythrocytic 1	SPTAN1	1.04058e+08	9.06176e+07	1.0001e+08	6.7207e+07	6.63524e+07	6.83611e+07
Q01082;A0A087WUZ3;Q01082-3;Q01082-2;F8W6C1;P11277-3;P11277;P11277-2;A4QPE4;O15020-2;O15020	Q01082;A0A087WUZ3;Q01082-3;Q01082-2	Spectrin beta chain, non-erythrocytic 1	SPTBN1	4.47571e+07	3.7558e+07	5.23172e+07	2.819e+07	3.09904e+07	3.20877e+07
P19623;K7EKM4;K7ESL0;K7EL89;K7EQ47	P19623	Spermidine synthase	SRM	1.56948e+07	1.72148e+07	1.61153e+07	9.35097e+06	1.14122e+07	9.89346e+06
J3KTL2;Q07955;Q07955-3;Q07955-2;J3KSR8;J3QQV5;J3KSW7	J3KTL2;Q07955;Q07955-3;Q07955-2;J3KSR8	Serine/arginine-rich splicing factor 1	SRSF1	4.61314e+07	3.30355e+07	3.61637e+07	5.56068e+07	4.55259e+07	4.85217e+07
A0A0B4J1Z1;C9JAB2;Q16629-3;Q16629-2;Q16629-4;Q16629	A0A0B4J1Z1;C9JAB2;Q16629-3;Q16629-2;Q16629-4;Q16629	Serine/arginine-rich splicing factor 7	SRSF7	3.18036e+07	2.73421e+07	3.32117e+07	3.41692e+07	3.60146e+07	3.03546e+07
P05455;E7ERC4;E9PGX9;E9PFL9	P05455;E7ERC4	Lupus La protein	SSB	3.86918e+07	3.70222e+07	3.14202e+07	4.38291e+07	5.19976e+07	4.91379e+07
Q04837;A0A0G2JLD8;E7EUY5;C9K0U8	Q04837;A0A0G2JLD8;E7EUY5;C9K0U8	Single-stranded DNA-binding protein, mitochondrial	SSBP1	2.4342e+07	1.79192e+07	2.01163e+07	1.27122e+07	1.69794e+07	1.47364e+07
P51571;A6NLM8	P51571;A6NLM8	Translocon-associated protein subunit delta	SSR4	2.2193e+07	2.25794e+07	2.40822e+07	2.62038e+07	2.75037e+07	2.86245e+07
P50502;H7C3I1;Q3KNR6;Q8IZP2;F6VDH7;Q8NFI4;F8WAQ7	P50502;H7C3I1;Q3KNR6;Q8IZP2;F6VDH7;Q8NFI4	Hsc70-interacting protein;Putative protein FAM10A4;Putative protein FAM10A5	ST13;ST13P4;ST13P5	3.04482e+07	2.01244e+07	3.0718e+07	3.74051e+07	4.3655e+07	4.08991e+07
P31948;P31948-2;P31948-3;F5H783;F5GXD8;H0YGI8	P31948;P31948-2;P31948-3	Stress-induced-phosphoprotein 1	STIP1	1.49568e+08	1.34266e+08	1.49994e+08	1.23715e+08	1.22795e+08	1.24621e+08
P16949;A2A2D0;P16949-2	P16949;A2A2D0;P16949-2	Stathmin	STMN1	4.93255e+07	4.31821e+07	4.41678e+07	5.84489e+07	5.68731e+07	5.39105e+07
Q9Y3F4;Q9Y3F4-2;H0YH33	Q9Y3F4;Q9Y3F4-2	Serine-threonine kinase receptor-associated protein	STRAP	4.32423e+07	5.01019e+07	4.3543e+07	3.45772e+07	3.54777e+07	3.70863e+07
Q8TCJ2	Q8TCJ2	Dolichyl-diphosphooligosaccharide--protein glycosyltransferase subunit STT3B	STT3B	1.08077e+07	1.57236e+07	1.10568e+07	8.65319e+06	9.46914e+06	9.29732e+06
P53999	P53999	Activated RNA polymerase II transcriptional coactivator p15	SUB1	3.95923e+07	4.45899e+07	4.07088e+07	3.25043e+07	3.765e+07	3.85579e+07
P61956-2;P61956;A8MUA9;A8MU27;Q6EEV6;P55854;P55854-2	P61956-2;P61956;A8MUA9;A8MU27;Q6EEV6;P55854;P55854-2	Small ubiquitin-related modifier 2;Small ubiquitin-related modifier 4;Small ubiquitin-related modifier 3	SUMO2;SUMO3;SUMO4	2.54322e+07	2.09079e+07	1.81264e+07	3.21778e+07	3.1262e+07	2.72299e+07
Q5T8U5;O15260-2;O15260;O15260-3;B7Z1G8	Q5T8U5;O15260-2;O15260;O15260-3;B7Z1G8	Surfeit locus protein 4	SURF4	2.10326e+07	2.23062e+07	3.41992e+07	1.93442e+07	1.51571e+07	1.69915e+07
O60506-3;O60506;O60506-4;O60506-2;B7Z645;O60506-5;F6UXX1	O60506-3;O60506;O60506-4;O60506-2;B7Z645;O60506-5	Heterogeneous nuclear ribonucleoprotein Q	SYNCRIP	8.23419e+07	1.00178e+08	1.06442e+08	6.96962e+07	7.81178e+07	7.66496e+07
P37802;P37802-2;X6RJP6	P37802;P37802-2;X6RJP6	Transgelin-2	TAGLN2	4.34876e+08	4.20015e+08	4.71865e+08	3.5478e+08	3.52546e+08	3.64123e+08
P37837;F2Z393;E9PM01;E9PKI8	P37837;F2Z393	Transaldolase	TALDO1	7.35175e+07	5.26754e+07	3.93447e+07	4.26385e+08	3.9937e+08	4.06944e+08
P26639;P26639-2;D6R9F8;D6RCA5;D6RDJ6;D6RBR8;B7ZLP8;A2RTX5-2;A2RTX5	P26639;P26639-2	Threonine--tRNA ligase, cytoplasmic	TARS	2.74711e+07	3.96426e+07	3.76709e+07	4.17265e+07	3.78328e+07	4.91775e+07
E5RIW3;E5RJD8;O75347;E5RHG6;O75347-2;E5RIX8	E5RIW3;E5RJD8;O75347;E5RHG6;O75347-2	Tubulin-specific chaperone A	TBCA	5.51885e+07	4.30476e+07	4.47448e+07	5.11191e+07	5.22403e+07	5.08964e+07
Q9NZ01;M0R3C3;M0QXM3;Q9NZ01-2	Q9NZ01	Very-long-chain enoyl-CoA reductase	TECR	1.50417e+07	1.13922e+07	1.05473e+07	1.0527e+07	1.03663e+07	1.21702e+07
Q92734-4;Q92734-3;Q92734-2;Q92734;C9JJP5;C9JUE0;C9JTY3	Q92734-4;Q92734-3;Q92734-2;Q92734;C9JJP5;C9JUE0;C9JTY3	Protein TFG	TFG	3.17396e+07	2.85312e+07	2.66789e+07	2.47633e+07	3.33662e+07	3.57525e+07
P29401;P29401-2;A0A0B4J1R6;E9PFF2;F8W888;F8WAX4	P29401;P29401-2;A0A0B4J1R6;E9PFF2	Transketolase	TKT	6.09047e+08	4.80856e+08	4.50344e+08	2.63772e+09	2.72363e+09	2.77265e+09
Q9Y490;Q9Y4G6;H0YMT1;A0A1B0GVU7	Q9Y490	Talin-1	TLN1	5.14765e+08	5.39541e+08	5.7504e+08	3.60075e+08	3.7523e+08	3.75353e+08
I3L0A0;Q13404;Q13404-7;Q13404-2;Q13404-1;Q13404-8;G3V2F7;A0A0A0MSL3;Q13404-6	I3L0A0;Q13404;Q13404-7;Q13404-2;Q13404-1;Q13404-8;G3V2F7;A0A0A0MSL3;Q13404-6	Ubiquitin-conjugating enzyme E2 variant 1	TMEM189-UBE2V1;UBE2V1	1.22837e+08	1.41983e+08	1.20411e+08	1.22909e+08	1.30962e+08	1.14668e+08
Q9BTV4;V9GY05	Q9BTV4	Transmembrane protein 43	TMEM43	2.58253e+07	3.21336e+07	2.68549e+07	2.26975e+07	3.03585e+07	2.4838e+07
P11387;E5RJ95;E5RFS0;E5RIC7;Q969P6-2;Q969P6	P11387	DNA topoisomerase 1	TOP1	1.02601e+07	9.61894e+06	8.4954e+06	7.37819e+06	8.25028e+06	9.22404e+06
A0A087WYR3;O43399;O43399-5;O43399-7;O43399-2;O43399-4;O43399-3;A0A087WZ51;O43399-6	A0A087WYR3;O43399;O43399-5;O43399-7;O43399-2;O43399-4;O43399-3;A0A087WZ51;O43399-6	Tumor protein D54	TPD52L2	6.96054e+07	6.34154e+07	6.14159e+07	4.2411e+07	4.79027e+07	4.0889e+07
O14773-2;O14773	O14773-2;O14773	Tripeptidyl-peptidase 1	TPP1	2.78463e+07	2.86817e+07	3.71713e+07	4.95154e+07	4.70437e+07	5.33643e+07
Q5W0H4;A0A0B4J2C3;P13693;J3KPG2;E9PJF7;P13693-2;H0YCX0;Q56UQ5	Q5W0H4;A0A0B4J2C3;P13693;J3KPG2;E9PJF7;P13693-2;H0YCX0	Translationally-controlled tumor protein	TPT1	1.4483e+08	1.50747e+08	1.5604e+08	1.00426e+08	8.76353e+07	8.09915e+07
Q13263;Q13263-2;M0R0K9;M0R2I3;M0R3C0	Q13263;Q13263-2;M0R0K9	Transcription intermediary factor 1-beta	TRIM28	4.80696e+07	4.4243e+07	4.72056e+07	7.38085e+07	7.84131e+07	7.13915e+07
E9PGT1;Q15631;H7C1D4;Q15631-2	E9PGT1;Q15631;H7C1D4	Translin	TSN	1.61759e+07	1.51355e+07	2.08375e+07	1.9384e+07	1.50476e+07	1.49604e+07
Q71U36;Q71U36-2;Q13748;Q13748-2;Q6PEY2;F8VQQ4	Q71U36;Q71U36-2;Q13748;Q13748-2;Q6PEY2	Tubulin alpha-1A chain;Tubulin alpha-3C/D chain;Tubulin alpha-3E chain	TUBA1A;TUBA3C;TUBA3E	9.67483e+07	9.74745e+07	7.15849e+07	8.17932e+07	9.13234e+07	9.16141e+07
P68363;P68363-2;F8VVB9;C9JDS9;F8VS66;F8VRZ4;F8VX09;F8VWV9;F8VRK0;F8W0F6;F8VXZ7	P68363;P68363-2	Tubulin alpha-1B chain	TUBA1B	3.014e+09	2.91876e+09	2.95375e+09	3.12005e+09	3.52515e+09	3.39171e+09
Q9BQE3;F5H5D3;A0A1W2PQM2	Q9BQE3;F5H5D3;A0A1W2PQM2	Tubulin alpha-1C chain	TUBA1C	7.59286e+07	8.45891e+07	8.44597e+07	8.16239e+07	8.87102e+07	9.25019e+07
Q5JP53;P07437;Q5ST81;A6NNZ2	Q5JP53;P07437;Q5ST81	Tubulin beta chain	TUBB	8.88737e+08	8.41258e+08	1.05584e+09	1.43628e+09	1.40544e+09	1.43999e+09
Q13509;A0A0B4J269;Q13509-2;G3V2A3;G3V5W4;G3V2R8;G3V3R4;G3V2N6;G3V542;G3V3J6;G3V3W7	Q13509;A0A0B4J269;Q13509-2	Tubulin beta-3 chain	TUBB3	1.22889e+08	1.11317e+08	1.09497e+08	7.38095e+07	8.72998e+07	8.25381e+07
P68371;M0R2D3;M0QY85;M0QZL7;M0QYM7;M0R0X0;M0QY37;M0QX14;M0R042;M0R2T4;A0A075B724	P68371	Tubulin beta-4B chain	TUBB4B	2.17443e+09	2.16305e+09	1.99922e+09	2.03216e+09	2.06737e+09	2.03533e+09
Q9BUF5;K7ESM5;K7EL29;K7ES63;K7EN98;K7ESQ3;K7EQT3;K7EJ64;K7ERA8;K7EJZ4;K7EPE5;K7EK43	Q9BUF5;K7ESM5	Tubulin beta-6 chain	TUBB6	1.09796e+09	1.11926e+09	1.32747e+09	8.99443e+08	9.06492e+08	8.84752e+08
Q3ZCM7;A0A075B736;Q5SQY0	Q3ZCM7;A0A075B736;Q5SQY0	Tubulin beta-8 chain	TUBB8	1.60889e+08	1.5397e+08	1.8819e+08	2.27597e+08	2.18838e+08	2.26347e+08
P49411;H3BNU3	P49411	Elongation factor Tu, mitochondrial	TUFM	6.97993e+07	6.7908e+07	7.0749e+07	8.38529e+07	8.80638e+07	8.58462e+07
Q12792;F8VS81;Q12792-3;Q12792-4;F8W1Q9;F8W645;F8VRG3	Q12792;F8VS81;Q12792-3;Q12792-4	Twinfilin-1	TWF1	1.82683e+07	1.10848e+07	1.47767e+07	9.73058e+06	9.07277e+06	1.15753e+07
P10599;P10599-2	P10599;P10599-2	Thioredoxin	TXN	1.58834e+08	1.603e+08	1.59148e+08	2.18222e+08	2.13283e+08	2.29813e+08
Q9BRA2;I3L0K2;I3L3M7;I3L2R6	Q9BRA2;I3L0K2;I3L3M7;I3L2R6	Thioredoxin domain-containing protein 17	TXNDC17	2.24876e+07	2.09442e+07	2.34501e+07	1.8676e+07	1.95204e+07	2.09664e+07
Q8NBS9;Q8NBS9-2	Q8NBS9;Q8NBS9-2	Thioredoxin domain-containing protein 5	TXNDC5	4.28073e+07	4.81497e+07	4.67548e+07	9.38943e+07	8.28559e+07	9.76677e+07
F8W809;A0A087WSW9;A0A182DWI3;A0A087WSY9;Q16881-5;Q16881-2;Q16881-4;Q16881-3;Q16881-6;Q16881;E9PIR7;E2QRB9;Q16881-7;E9PKD3;A0A0B4J225;E9PIZ5;E9PLT3;E9PKI4;E9PQI3;E9PRI8	F8W809;A0A087WSW9;A0A182DWI3;A0A087WSY9;Q16881-5;Q16881-2;Q16881-4;Q16881-3;Q16881-6;Q16881;E9PIR7;E2QRB9;Q16881-7	Thioredoxin reductase 1, cytoplasmic	TXNRD1	9.62766e+07	7.05508e+07	7.96505e+07	4.02197e+08	4.53318e+08	4.58065e+08
P26368-2;P26368;K7ENG2;K7ELP8	P26368-2;P26368;K7ENG2	Splicing factor U2AF 65 kDa subunit	U2AF2	4.3387e+07	4.52378e+07	4.08584e+07	5.53681e+07	5.78137e+07	5.44274e+07
P22314-2;P22314;Q5JRR6;Q5JRR9;Q5JRS0;Q5JRS1;Q5JRS3;Q5JRS2	P22314-2;P22314;Q5JRR6	Ubiquitin-like modifier-activating enzyme 1	UBA1	3.20814e+08	3.15924e+08	3.52801e+08	3.69246e+08	3.9619e+08	4.13603e+08
P68036;P68036-3;P68036-2;A0A1B0GUS4	P68036;P68036-3;P68036-2;A0A1B0GUS4	Ubiquitin-conjugating enzyme E2 L3	UBE2L3	4.57551e+07	4.8202e+07	3.93235e+07	7.35697e+07	8.7531e+07	7.33456e+07
P09936;D6RE83;D6R956;D6R974;D6RF53	P09936;D6RE83;D6R956;D6R974	Ubiquitin carboxyl-terminal hydrolase isozyme L1;Ubiquitin carboxyl-terminal hydrolase	UCHL1	2.52802e+08	2.56823e+08	2.43686e+08	1.71489e+08	1.78333e+08	1.6805e+08
O60701;O60701-2;O60701-3;E7ER83;E7ETF4;E7EV97;E7ER95;D6RHF4;E9PBD2	O60701;O60701-2;O60701-3	UDP-glucose 6-dehydrogenase	UGDH	2.13869e+07	1.96537e+07	2.13944e+07	4.48982e+07	4.39885e+07	4.13025e+07
A0A087WYS1;E7EUC7;Q16851-2;Q16851;C9JWG0;C9JVG3;C9JQU9;C9JNZ1;C9JTZ5;C9JUW1	A0A087WYS1;E7EUC7;Q16851-2;Q16851	UTP--glucose-1-phosphate uridylyltransferase	UGP2	3.70837e+07	3.6703e+07	3.69221e+07	1.94003e+07	2.00005e+07	1.65151e+07
A0A1B0GVZ4;P06132;A0A1B0GVN9;Q5T446;H0Y5R6	A0A1B0GVZ4;P06132;A0A1B0GVN9;Q5T446;H0Y5R6	Uroporphyrinogen decarboxylase	UROD	2.9729e+07	1.86386e+07	2.12565e+07	2.63966e+07	2.59219e+07	1.98222e+07
A6NJA2;P54578-2;P54578-3;P54578;J3QQT6;J3KS55	A6NJA2;P54578-2;P54578-3;P54578	Ubiquitin carboxyl-terminal hydrolase;Ubiquitin carboxyl-terminal hydrolase 14	USP14	3.59181e+07	3.35383e+07	3.77982e+07	1.88637e+07	2.3035e+07	2.3559e+07
P45974-2;P45974;F5H571;H7C5J3;Q92995-2;Q92995	P45974-2;P45974	Ubiquitin carboxyl-terminal hydrolase 5	USP5	4.17182e+07	4.74761e+07	4.70274e+07	3.53617e+07	3.49356e+07	3.83968e+07
Q9P0L0;Q9P0L0-2;J3QKM9	Q9P0L0;Q9P0L0-2	Vesicle-associated membrane protein-associated protein A	VAPA	5.32418e+07	3.56645e+07	4.95996e+07	3.78438e+07	3.53589e+07	4.08393e+07
Q99536;Q99536-3;Q99536-2;K7ERT7;K7ESA3;K7ENX2;K7EM19;K7EJM4;K7ER81	Q99536;Q99536-3;Q99536-2	Synaptic vesicle membrane protein VAT-1 homolog	VAT1	4.2584e+07	4.58857e+07	3.80337e+07	2.65211e+07	2.55832e+07	2.26245e+07
P61758;B4DWR3	P61758;B4DWR3	Prefoldin subunit 3	VBP1	1.33571e+07	1.29111e+07	2.53074e+07	1.46321e+07	2.69699e+07	1.9131e+07
P18206-2;P18206;P18206-3;A0A096LPE1	P18206-2;P18206	Vinculin	VCL	3.26978e+08	2.97053e+08	3.2465e+08	3.02508e+08	2.97938e+08	2.89417e+08
P55072;C9IZA5;C9JUP7	P55072	Transitional endoplasmic reticulum ATPase	VCP	4.99481e+08	5.08918e+08	5.89296e+08	4.62336e+08	4.43417e+08	4.27427e+08
P21796;C9JI87	P21796;C9JI87	Voltage-dependent anion-selective channel protein 1	VDAC1	2.58316e+08	2.80359e+08	2.80238e+08	2.29944e+08	2.08327e+08	2.24918e+08
A0A0A0MR02;P45880;P45880-2;P45880-1;Q5JSD2;Q5JSD1;A2A3S1	A0A0A0MR02;P45880;P45880-2;P45880-1;Q5JSD2;Q5JSD1	Voltage-dependent anion-selective channel protein 2	VDAC2	8.26187e+07	9.72899e+07	9.53425e+07	6.15135e+07	5.82226e+07	6.30422e+07
Q9Y277;Q9Y277-2;E5RFP6;E5RJN6;E5RHZ6;E5RHE1;E5RK27;E5RFL1	Q9Y277;Q9Y277-2;E5RFP6;E5RJN6;E5RHZ6;E5RHE1;E5RK27	Voltage-dependent anion-selective channel protein 3	VDAC3	8.72835e+06	1.2071e+07	8.24518e+06	9.47482e+06	8.86337e+06	1.08151e+07
P23381;P23381-2;G3V3H8;G3V3Y5;H0YJP3;G3V277;G3V423;G3V3P2;G3V227;G3V5U1;G3V456;G3V2Y7;G3V4C7;G3V4N8;G3V5W1;G3V3S7;G3V3X0;G3V5H5;P78534;G3V4A3;G3V4Q0;G3V2F2;G3V3R3;G3V4S4;G3V313;G3V339;G3V2C0;G3V4N0	P23381;P23381-2	Tryptophan--tRNA ligase, cytoplasmic;T1-TrpRS;T2-TrpRS	WARS	4.36753e+07	4.28661e+07	4.34613e+07	9.05595e+07	9.64188e+07	1.00645e+08
O75083;O75083-3;D6RD66	O75083;O75083-3	WD repeat-containing protein 1	WDR1	2.82719e+08	2.93424e+08	3.04348e+08	1.51198e+08	1.37456e+08	1.6359e+08
O14980;C9JKM9;F8WF71;C9IZS4;C9JQ02;C9JV99;C9J673;C9JF49;C9IYM2;H7BZC5	O14980	Exportin-1	XPO1	2.18733e+07	2.29914e+07	2.3938e+07	2.57274e+07	1.97796e+07	2.47914e+07
P13010;C9JZ81	P13010	X-ray repair cross-complementing protein 5	XRCC5	1.42607e+08	1.29474e+08	1.29968e+08	2.11438e+08	2.14388e+08	2.17803e+08
P12956;B1AHC9;P12956-2	P12956;B1AHC9;P12956-2	X-ray repair cross-complementing protein 6	XRCC6	1.41454e+08	1.51654e+08	1.42209e+08	2.36003e+08	2.44134e+08	2.43232e+08
P67809;H0Y449;C9J5V9;Q9Y2T7	P67809;H0Y449;C9J5V9	Nuclease-sensitive element-binding protein 1	YBX1	1.89968e+08	1.7979e+08	1.51957e+08	1.96554e+08	1.92788e+08	1.74242e+08
P31946-2;P31946;Q4VY20;Q4VY19;A0A0J9YWE8;A0A0J9YWZ2	P31946-2;P31946	14-3-3 protein beta/alpha;14-3-3 protein beta/alpha, N-terminally processed	YWHAB	2.11961e+08	1.99803e+08	1.86026e+08	2.36973e+08	2.19994e+08	1.91614e+08
P62258;P62258-2;K7EM20;B4DJF2;I3L3T1;K7EIT4;I3L0W5	P62258;P62258-2	14-3-3 protein epsilon	YWHAE	3.49662e+08	3.55001e+08	3.59356e+08	3.94903e+08	3.8158e+08	3.90383e+08
P61981	P61981	14-3-3 protein gamma;14-3-3 protein gamma, N-terminally processed	YWHAG	2.02684e+08	2.24161e+08	1.81444e+08	2.2472e+08	2.00201e+08	1.8381e+08
P27348;E9PG15	P27348;E9PG15	14-3-3 protein theta	YWHAQ	1.77295e+08	1.77186e+08	1.77477e+08	1.579e+08	1.44147e+08	1.45895e+08
P63104;E7EX29;B0AZS6;P63104-2;B7Z2E6;H0YB80;E7ESK7;E9PD24;E7EVZ2;E5RGE1;E5RIR4	P63104;E7EX29;B0AZS6;P63104-2;B7Z2E6;H0YB80	14-3-3 protein zeta/delta	YWHAZ	8.59532e+08	7.73405e+08	8.08162e+08	8.14321e+08	8.26577e+08	8.18307e+08
Q15942;H0Y2Y8;Q15942-2;H7C3D3;C9IZ41;C9JJK5;H7C3R3	Q15942;H0Y2Y8;Q15942-2	Zyxin	ZYX	5.21936e+07	4.31511e+07	3.45259e+07	3.20677e+07	3.3107e+07	2.75026e+07
P15121;E9PCX2;E9PEF9	P15121;E9PCX2	Aldose reductase	AKR1B1	6.53934e+08	6.36086e+08	6.05567e+08	4.38311e+08	4.59575e+08	5.16899e+08
P09525;Q6P452;P09525-2;B4E1S2	P09525;Q6P452;P09525-2	Annexin A4;Annexin	ANXA4	1.11369e+07	1.14466e+07	1.20422e+07	1.94544e+07	3.67549e+07	2.52394e+07
P06576;H0YH81;F8W079;F8W0P7;H0YI37	P06576;H0YH81;F8W079	ATP synthase subunit beta, mitochondrial;ATP synthase subunit beta	ATP5B	2.77226e+08	3.00394e+08	3.06894e+08	4.46819e+08	4.22963e+08	4.16785e+08
O43852;O43852-3;O43852-5;O43852-6;O43852-9;O43852-15;O43852-10;H0Y875;O43852-13;O43852-14;O43852-11;O43852-12	O43852;O43852-3;O43852-5;O43852-6;O43852-9;O43852-15;O43852-10;H0Y875	Calumenin	CALU	6.05378e+08	5.77881e+08	6.40464e+08	2.66914e+08	2.63721e+08	2.66948e+08
P78371;P78371-2;F5GWF6;F8VQ14	P78371;P78371-2;F5GWF6;F8VQ14	T-complex protein 1 subunit beta	CCT2	1.86121e+08	1.82864e+08	1.97132e+08	1.62695e+08	1.67791e+08	1.703e+08
P50990;P50990-2;P50990-3;H7C4C8;H7C2U0	P50990;P50990-2;P50990-3;H7C4C8	T-complex protein 1 subunit theta	CCT8	1.16746e+08	1.20401e+08	1.05922e+08	9.95379e+07	1.10064e+08	1.01918e+08
Q07065	Q07065	Cytoskeleton-associated protein 4	CKAP4	1.41202e+08	1.20241e+08	1.06346e+08	1.9536e+08	1.96959e+08	1.90915e+08
J3KNF8;H3BUX2;O43169;D6RFH4;J3QR91	J3KNF8;H3BUX2;O43169;D6RFH4	Cytochrome b5 type B	CYB5B	4.81944e+07	3.82326e+07	4.35536e+07	5.95925e+07	6.67562e+07	6.50318e+07
P26641;P26641-2	P26641;P26641-2	Elongation factor 1-gamma	EEF1G	5.27691e+08	5.66418e+08	5.85615e+08	4.72333e+08	4.67288e+08	5.08639e+08
P13639	P13639	Elongation factor 2	EEF2	1.51266e+09	1.46349e+09	1.53908e+09	1.16788e+09	1.18944e+09	1.25928e+09
P06733;P06733-2;K7EM90;E5RI09;E5RG95;K7EPM1;K7EKN2;E5RGZ4	P06733;P06733-2	Alpha-enolase	ENO1	5.00949e+09	4.83322e+09	5.09478e+09	3.47456e+09	3.46455e+09	3.36789e+09
Q14697-2;E9PKU7;E9PNH1	Q14697-2;E9PKU7	Neutral alpha-glucosidase AB	GANAB	5.27575e+08	5.24832e+08	5.25335e+08	5.93589e+08	5.95638e+08	6.10284e+08
P00367;P00367-3;P00367-2;P49448	P00367;P00367-3;P00367-2;P49448	Glutamate dehydrogenase 1, mitochondrial;Glutamate dehydrogenase 2, mitochondrial	GLUD1;GLUD2	3.48226e+07	3.73563e+07	3.44125e+07	3.69726e+07	3.57595e+07	3.84292e+07
A0A140T9I0;A0A140T9X5;A0A140T913;P01892;A0A140T955;A0A140T933;A0A1W2PRT9;A0A1W2PPQ2;P30459;A0A140T975;Q9GJ45;A0A1W2PS39;P16189;P10314;A0A140T941;A0A1W2PQS8;A0A140T9Z6;B0UXQ0;P30512;Q09160	A0A140T9I0;A0A140T9X5;A0A140T913;P01892;A0A140T955;A0A140T933;A0A1W2PRT9;A0A1W2PPQ2;P30459	HLA class I histocompatibility antigen, A-2 alpha chain;HLA class I histocompatibility antigen, A-74 alpha chain	HLA-A	7.39505e+07	7.59625e+07	6.60883e+07	1.92545e+08	1.81802e+08	2.07678e+08
A0A0G2JIW1;P0DMV9;P0DMV8;P0DMV8-2;V9GZ37	A0A0G2JIW1;P0DMV9;P0DMV8;P0DMV8-2;V9GZ37	Heat shock 70 kDa protein 1B;Heat shock 70 kDa protein 1A	HSPA1B;HSPA1A	7.90608e+07	7.33591e+07	7.04711e+07	2.28332e+08	2.39839e+08	2.14499e+08
P11021	P11021	78 kDa glucose-regulated protein	HSPA5	8.191e+08	7.89864e+08	8.12001e+08	7.50153e+08	7.18598e+08	7.14067e+08
P11142;E9PKE3;P11142-2;E9PNE6;E9PN89;A8K7Q2;E9PLF4;E9PQQ4;E9PQK7;E9PK54;E9PPY6;E9PN25;E9PI65;E9PS65;E9PM13	P11142;E9PKE3;P11142-2;E9PNE6;E9PN89;A8K7Q2	Heat shock cognate 71 kDa protein	HSPA8	2.10902e+09	2.01778e+09	2.16543e+09	1.85047e+09	1.89112e+09	1.81904e+09
P38646;D6RJI2;D6RA73;H0Y8S0;H0YBG6	P38646	Stress-70 protein, mitochondrial	HSPA9	1.59338e+08	1.48163e+08	1.46303e+08	1.53309e+08	1.37529e+08	1.41151e+08
P04792;F8WE04;C9J3N8	P04792;F8WE04	Heat shock protein beta-1	HSPB1	2.30075e+08	2.52404e+08	2.30746e+08	3.20809e+08	3.23451e+08	3.01336e+08
P10809;E7ESH4;E7EXB4;P10809-2;C9JL25;C9J0S9;C9JL19;C9JCQ4	P10809	60 kDa heat shock protein, mitochondrial	HSPD1	4.76241e+08	4.63831e+08	4.55255e+08	3.86813e+08	3.88405e+08	3.50583e+08
Q16891-2;Q16891;B9A067;Q16891-4;Q16891-3;C9J406;H7C463;A0A087WYS0;D6RAW4	Q16891-2;Q16891;B9A067;Q16891-4;Q16891-3;C9J406;H7C463	MICOS complex subunit MIC60	IMMT	3.12459e+07	1.89802e+07	2.85595e+07	2.60324e+07	2.79363e+07	2.70951e+07
P04264	P04264	Keratin, type II cytoskeletal 1	KRT1	3.99749e+08	1.03558e+09	4.1533e+08	3.70226e+08	3.98782e+08	2.45847e+08
Q12907;D6RBV2;D6RIU4;D6RDX1;D6RBH1	Q12907;D6RBV2;D6RIU4;D6RDX1	Vesicular integral-membrane protein VIP36	LMAN2	3.9717e+07	4.66596e+07	4.39418e+07	2.77942e+07	2.42658e+07	2.09259e+07
P26038;V9GZ54;E9PNP4	P26038	Moesin	MSN	6.11133e+08	5.68616e+08	6.10828e+08	7.44154e+08	7.29656e+08	7.38381e+08
Q14764;H3BQK6;H3BRL2;H3BUK7;H3BNF6;H3BP76;H3BPZ2;H3BNF2;H3BUP3;H3BQE7;I3L155	Q14764	Major vault protein	MVP	2.82835e+08	2.66462e+08	2.45002e+08	2.60202e+08	2.82595e+08	2.70728e+08
Q99497;K7ELW0;K7EN27	Q99497;K7ELW0;K7EN27	Protein deglycase DJ-1	PARK7	1.84989e+08	1.61805e+08	1.98278e+08	1.56645e+08	1.78096e+08	1.68546e+08
Q8WUM4;Q8WUM4-2;Q8WUM4-3;C9IZF9;F8WEQ7;F8WBR8;F8WDK9	Q8WUM4;Q8WUM4-2	Programmed cell death 6-interacting protein	PDCD6IP	3.86593e+07	4.07559e+07	3.42088e+07	3.39723e+07	2.94727e+07	3.58741e+07
P30101	P30101	Protein disulfide-isomerase A3	PDIA3	6.54878e+08	6.50954e+08	6.61381e+08	4.78821e+08	5.08836e+08	4.76916e+08
P18669;Q8N0Y7;P15259	P18669	Phosphoglycerate mutase 1	PGAM1	1.03387e+09	1.00454e+09	1.06961e+09	5.78522e+08	5.71085e+08	5.9122e+08
P35232;C9JW96;C9JZ20;E7ESE2;E9PCW0;P35232-2;D6RBK0	P35232;C9JW96;C9JZ20;E7ESE2;E9PCW0;P35232-2	Prohibitin	PHB	5.61026e+07	5.75448e+07	5.88203e+07	4.88289e+07	5.24086e+07	5.07413e+07
A0A286YF22;O43175;A0A2C9F2M7;A0A286YFA2;A0A286YFL2;A0A286YFM8;A0A286YF78;A0A286YER3;A0A286YFC8;A0A286YFB2;A0A286YF34;A0A286YFE1;A0A286YFF3;A0A286YFK5	A0A286YF22;O43175;A0A2C9F2M7;A0A286YFA2;A0A286YFL2	D-3-phosphoglycerate dehydrogenase	PHGDH	5.17396e+07	2.93434e+07	5.72537e+07	1.95044e+08	1.95689e+08	1.94168e+08
Q06830;A0A0A0MSI0;A0A0A0MRQ5	Q06830;A0A0A0MSI0	Peroxiredoxin-1	PRDX1	6.58609e+08	5.75448e+08	5.39835e+08	1.80925e+09	1.79851e+09	1.87124e+09
P30041	P30041	Peroxiredoxin-6	PRDX6	1.75093e+08	1.69052e+08	1.93791e+08	2.40829e+08	2.51434e+08	2.48016e+08
Q9H0U4;E9PLD0;Q92928	Q9H0U4;E9PLD0	Ras-related protein Rab-1B	RAB1B	2.78317e+07	3.37773e+07	2.8708e+07	1.66133e+07	1.82928e+07	2.01303e+07
P17987;E7ERF2;E7EQR6;F5H282;F5GZ03;F5H136;F5H676;F5H726;F5GZI8;F5H7Y1;F5GYL4	P17987;E7ERF2;E7EQR6;F5H282	T-complex protein 1 subunit alpha	TCP1	8.56628e+07	9.77072e+07	9.13384e+07	8.6842e+07	7.10121e+07	7.5629e+07
P60174-1;P60174;P60174-4;U3KPZ0;U3KQF3;U3KPS5	P60174-1;P60174;P60174-4	Triosephosphate isomerase	TPI1	5.36024e+09	5.1197e+09	5.55406e+09	3.72521e+09	3.51173e+09	3.72272e+09
Q5HYB6;P06753-2;A0A087WWU8;P06753-5;Q5VU61;P06753-3;P06753-6;P06753-4;D6R904;D6RFM2	Q5HYB6;P06753-2;A0A087WWU8;P06753-5;Q5VU61;P06753-3;P06753-6;P06753-4	Tropomyosin alpha-3 chain	DKFZp686J1372;TPM3	1.79496e+08	1.62808e+08	1.68641e+08	1.79844e+08	2.00893e+08	1.96722e+08
P67936;K7EMU5;K7EPB9;U3KQK2;K7EPV9;H0YL80;K7EP68	P67936	Tropomyosin alpha-4 chain	TPM4	1.50029e+08	1.29858e+08	1.36407e+08	1.19461e+08	1.38613e+08	1.27256e+08
P31930	P31930	Cytochrome b-c1 complex subunit 1, mitochondrial	UQCRC1	2.13649e+07	2.60954e+07	2.81946e+07	4.52869e+07	4.22147e+07	3.89856e+07
P08670;B0YJC4;B0YJC5;A0A1B0GTT5;A0A1B0GVG8;P17661;H7C5W5;P41219;P41219-2;U3KPR1;B4DIR1;K7ELP4;F8W835;K7EJU1;K7EKH9;A0A1X7SCE1;K7EMP8;A0A1X7SBR3;A0A087X106;A0A1W2PR46;E7EMV2;E7ESP9;Q8N1N4-2;P14136-3;P14136;P14136-2;O43790;P78385;Q14533;P78386;Q8N1N4;P07197-2;P07196;P07197;P12036-2;P12036	P08670;B0YJC4	Vimentin	VIM	1.76215e+10	1.75841e+10	1.73192e+10	5.15282e+09	4.7783e+09	4.65221e+09

## Sheet: Correlation matrix
Gene protein	PC1	PC2	PC3	PC4	PC5
ALCAM	0.936388	-0.256657	0.111138	0.109931	0.181297
ATAD3A	0.510041	-0.746357	0.155482	0.381848	-0.113252
CRAT	0.141998	-0.11177	0.144114	-0.709808	-0.665393
DECR1	-0.512911	0.0205095	-0.604873	-0.456724	0.402534
DNAH8	0.948035	0.0620703	0.294988	0.0868726	-0.0530247
EIF4EBP1	0.678576	0.30493	0.0147057	-0.478692	-0.466036
IGF2BP3	0.932297	-0.298376	-0.133029	0.14785	-0.0473093
NDUFAB1	-0.936006	-0.0727618	0.00240781	-0.317082	0.134354
PPIC	-0.700798	0.255902	0.355714	-0.380226	0.415081
RPE	-0.8688	-0.414933	-0.0802511	-0.182142	0.182761
RPS29	0.13334	0.294463	-0.272248	0.891581	0.162713
RRM1	0.774508	-0.584854	0.0993288	0.209789	-0.0648568
SF3A1	0.0688362	-0.422946	0.218789	0.560669	0.673914
SNRPN	0.653226	0.0111287	-0.130585	-0.611852	0.426329
SNX1	0.338214	-0.712562	-0.473768	0.386186	0.0653518
SRSF9	0.893775	-0.343647	0.0750679	-0.0619585	-0.271291
VAMP3	0.984219	-0.0144935	-0.107859	0.0932141	-0.103833
ARF5	0.778393	-0.572599	-0.0576417	0.238043	0.0790371
DCTN2	-0.330764	0.274343	-0.82674	0.209997	0.296199
DIAPH1	0.522861	-0.808929	0.0965228	0.250862	0.00102659
HACD3	0.89298	0.0877657	-0.288559	-0.0960043	0.320002
HADH	-0.970405	0.193785	-0.127489	0.0644241	-0.0189063
HDGFRP2	0.906898	-0.405938	-0.0483317	0.100036	0.0202037
LIMS1	0.920873	-0.343907	0.155425	0.014794	0.0966681
PSMD14	0.32065	-0.329453	0.754599	0.346475	0.314927
RPL29	0.631671	-0.53603	0.506339	0.216288	0.102488
SQSTM1	0.31172	-0.0558698	0.94348	0.0851379	-0.0480302
UBE2D2	0.667326	-0.508378	0.00183615	0.538947	0.0759002
DYNC1LI2	0.766695	-0.378349	-0.366098	-0.26456	-0.254973
AKR1A1	-0.973512	-0.000194291	0.182023	-0.136632	-0.0217479
AKR1C2	-0.997571	0.0154124	-0.0652595	-0.000442377	0.0188708
ANXA11	-0.48318	0.764634	0.106839	0.1988	-0.36185
API5	-0.656676	0.625909	-0.220875	-0.296957	-0.200113
ATP5O	0.161988	-0.465888	-0.463683	0.45978	-0.574724
ATP6V1A	0.899018	0.137638	0.0699787	0.324784	-0.249882
ATP6V1B2	0.915753	-0.130523	-0.213204	0.254967	-0.184107
ATP6V1G1	0.528405	0.137712	0.544518	-0.612717	-0.172921
BOLA2	0.827145	-0.404276	-0.298558	0.059305	0.244414
CARS	-0.319513	-0.0474956	-0.462552	-0.803609	0.189509
CAT	-0.891227	-0.0597916	-0.39638	0.0463077	0.20707
CSNK2A1	-0.910271	0.106549	-0.0725179	0.139721	0.367795
CTNNA1	-0.930875	-0.0916896	0.0100341	-0.332102	-0.121129
DNPEP	0.929703	-0.150252	0.221601	-0.116583	-0.224452
DPP3	0.932131	0.0942597	-0.162208	0.0146439	0.309389
EIF3H	0.875352	0.0346826	0.132998	-0.0924574	0.454224
ELAVL1	-0.997513	-0.0205176	0.0413542	-0.0527218	0.00758423
EPHX1	-0.997577	0.0183171	-0.0626374	0.0227163	0.00804229
ETFB	-0.986948	0.00460419	0.0739712	0.0477298	0.134766
FARSB	-0.331298	-0.355257	0.128214	-0.381693	0.775826
FBL	-0.879301	-0.0296449	-0.470957	-0.0250728	-0.0593452
FEN1	0.424987	-0.356204	-0.593185	0.575102	0.0994678
FTL	-0.993896	0.0133609	-0.0511571	-0.0311973	-0.0916672
GLO1	-0.96152	0.0439501	-0.0825706	0.254724	0.0429553
GOT1	-0.522311	0.253645	-0.077693	0.110704	0.802847
GRHPR	-0.830872	-0.243258	-0.0927121	0.480801	0.103499
GSR	-0.882879	0.0632611	-0.0878317	0.158728	0.428502
GTF2I	-0.764118	0.0101258	0.0413892	0.0913344	-0.637155
HSD17B4	-0.84883	0.0723511	-0.117467	0.281969	0.42538
LEPRE1	-0.913368	0.087705	-0.110758	0.376997	-0.0605954
LRPPRC	-0.86292	-0.0896662	-0.0158849	-0.488102	0.0939889
MAPK1	0.961611	0.0495601	0.118961	0.237047	-0.0500434
MARS	-0.997012	0.0337358	-0.0270118	-0.0639981	0.00202858
NSFL1C	-0.93788	0.0595569	-0.170274	0.0284039	-0.295016
PCYT1A	-0.501146	-0.0674334	-0.0271203	-0.20468	0.837661
PDHA1	-0.789154	0.234637	-0.379534	0.412753	0.088151
PRDX2	-0.987304	-0.0150657	-0.0427365	-0.144207	0.0488013
PSIP1	0.502814	0.104679	-0.843289	0.10408	0.119375
PSMB3	-0.965937	-0.0643397	-0.104967	-0.175146	0.145367
PSMD8	0.621267	-0.309955	-0.086456	0.704143	0.121093
PTGR1	-0.993681	0.0253848	-0.0675805	0.0762829	0.0395837
PTPN1	0.349289	0.0491736	0.263238	-0.890332	-0.11659
RAE1	-0.291833	-0.914053	-0.159355	0.153613	0.17421
RBBP7	-0.78086	0.0701714	0.0248465	-0.00160439	-0.620254
SARS	-0.874098	-0.0806884	-0.0750842	0.328047	0.340867
SCP2	-0.900738	-0.0634721	-0.392127	-0.157864	-0.0771812
SF3B3	-0.626114	-0.0652495	-0.316171	0.299977	-0.643252
SF3B4	0.0976692	-0.0478613	-0.287938	-0.916331	0.256124
SLC1A5	-0.984042	-0.153866	-0.0362538	-0.0719458	0.0386695
SLC25A6	-0.982102	0.012917	-0.105679	0.138037	0.0713163
SLC39A7	-0.843526	-0.105867	0.0420019	-0.470391	-0.232863
SPARC	-0.617541	0.24432	-0.0664342	0.0682943	0.741534
TOMM22	-0.918235	-0.200971	-0.239747	0.133672	0.202751
TOMM70A	-0.143018	-0.910979	0.207744	0.189575	-0.265644
TTN	0.959601	0.0887268	0.0465442	0.16046	0.208277
UBAP2L	-0.570935	0.149053	0.00584632	0.741564	-0.319164
ATP5H	0.248733	-0.0751599	0.0333312	-0.678756	0.686048
SDHA	-0.520861	0.169766	-0.201046	-0.0374973	0.811207
ADRM1	0.942254	0.0858273	-0.306425	-0.0986166	-0.0341854
BTF3	0.991277	0.121292	-0.04562	0.0181197	0.0157821
CIRBP	-0.977613	0.116145	-0.104425	-0.00748206	-0.140793
CPOX	0.786148	0.418194	-0.400696	-0.176206	-0.124414
GFPT1	0.75075	-0.1778	-0.0625439	-0.607778	-0.177356
HNRNPUL1	-0.623965	0.402863	-0.612485	-0.270407	0.0104938
NUCB2	0.22142	-0.266532	0.622733	0.230501	0.662576
PDCD6	0.726615	0.121044	0.137562	0.641118	-0.165601
PLOD1	0.929105	-0.31506	-0.157174	-0.0556593	-0.0984905
PRPF19	-0.791675	-0.433469	-0.368775	-0.0676359	-0.211626
PSMB6	0.876881	0.469612	-0.042617	-0.0931255	0.00749033
RBM3	-0.867114	-0.189047	0.439077	0.0779351	0.116246
RPL34	-0.215467	-0.406746	-0.510974	-0.566676	0.453779
RPS28	-0.0392425	-0.346285	0.713038	0.562735	0.2312
SRP72	0.543562	-0.356016	0.683929	-0.320219	0.08657
TM9SF2	0.626516	0.498861	-0.364748	-0.267115	0.392714
TMED7.TICAM2	0.855328	-0.493104	-0.0481546	0.144354	0.0458831
TSPO	0.928075	0.0688109	0.357942	0.00646733	0.0760149
UBE2M	-0.388364	-0.653882	0.350811	-0.24666	-0.487547
AK4	0.919385	-0.050782	-0.375881	0.103867	-0.00884563
BZW1	0.956547	-0.212261	0.167296	0.106426	0.0254642
CYFIP2	0.797652	0.475286	0.355041	0.0740916	-0.0794477
EZR	0.936226	0.138946	0.316147	0.0333513	0.0558001
FLNC	0.990952	0.103174	0.0851195	0.00386303	0.0104145
MAP2K1	0.931487	0.333414	0.143508	-0.013599	0.0196879
NCEH1	0.923015	0.298809	-0.110069	-0.0666202	-0.205436
OGDH	0.84178	-0.356134	-0.39865	0.0707582	-0.0254305
OXSR1	0.565235	-0.784546	0.174445	0.156391	-0.100537
PXN	0.999341	0.0248354	0.0189642	-0.00438144	0.0179694
RPS26	0.538299	-0.030117	-0.811064	-0.21185	-0.0813733
RTN3	0.924364	0.0160443	0.0783274	0.236543	-0.288456
TMED9	0.86228	0.254547	0.151755	0.406208	0.0603663
TWF2	0.933482	0.324588	0.0730765	-0.0959788	-0.0932804
AKR1C3	-0.991302	0.0261207	-0.0659788	0.100412	-0.0469302
ANXA7	0.854018	0.0662852	0.198847	-0.319964	-0.352623
ATP1B3	-0.746306	0.107149	-0.391879	-0.294262	0.437478
CAD	0.782695	-0.45735	-0.29603	-0.0729597	-0.291998
CNBP	-0.145705	0.0666187	-0.771287	0.587426	-0.185415
COLGALT1	0.572724	0.526891	-0.0367005	0.288681	-0.556498
COX4I1	-0.858168	0.266058	0.257317	0.35545	0.0142898
CYC1	-0.839276	0.131432	-0.157113	0.243867	-0.440665
DDX1	0.419183	-0.303975	0.0681715	-0.504551	0.687507
EWSR1	-0.868891	-0.245734	-0.32856	-0.126819	-0.246187
GMPS	-0.921959	0.0625522	-0.0996299	-0.363903	0.0610508
GORASP2	-0.250522	-0.83966	-0.0488121	-0.392054	0.2759
HEBP1	-0.640836	0.296772	-0.215687	-0.540164	-0.40368
LARS	-0.815631	0.275799	-0.280284	0.116359	0.408145
LRRFIP1	-0.601605	-0.499126	0.0523376	-0.619461	-0.0497399
MAT2A	-0.94859	0.0563675	-0.151507	0.257493	0.087989
NANS	-0.268321	0.18215	-0.825752	-0.068428	0.456374
NASP	-0.525487	0.249581	-0.1013	0.540318	-0.599473
NOMO1	0.233154	-0.367038	-0.750194	0.450617	-0.21231
NUDT21	-0.153318	0.805823	-0.205164	0.531033	-0.0552658
PAFAH1B1	0.318781	0.225843	0.0702061	0.248235	-0.883642
PAFAH1B3	-0.900877	0.129221	-0.0583443	0.0352524	-0.408749
PARP1	-0.646266	0.500533	-0.543398	-0.186361	-0.0423558
PDHB	-0.403163	0.399234	-0.489217	0.613668	-0.249298
PGRMC2	0.0485444	0.503076	0.481097	0.650835	0.299193
PON2	-0.905884	-0.00593865	0.041921	-0.418795	-0.0468287
PPP2R2A	0.329438	-0.327467	-0.710805	0.343523	-0.401227
PRPF8	-0.0137255	0.189285	-0.183759	0.964176	-0.024086
PSAP	-0.146165	0.888786	-0.276054	0.275449	-0.191355
PSMA3	0.529835	0.122243	0.0179302	0.82479	0.154049
RANBP1	-0.927797	-0.0418536	0.00447258	-0.0841306	0.361031
RBM14	-0.671954	-0.59058	0.0323821	-0.398169	0.200265
RPL21	-0.659004	-0.497321	0.517649	0.111538	-0.194898
RPL28	-0.826337	0.204201	-0.123073	-0.510212	0.00253819
RPS27	-0.989487	-0.0457913	0.0137517	0.108346	-0.0830101
RTCB	0.169308	0.208176	-0.37763	0.441959	-0.768157
SAR1B	0.922855	-0.192606	0.142422	0.264789	-0.144374
SF3B1	-0.837249	-0.141607	-0.00845261	-0.513156	0.12474
SH3BGRL	-0.0876575	-0.33748	0.0245285	-0.520964	0.778729
SH3GL1	-0.0802027	-0.677386	0.432054	0.578189	-0.117228
SLC25A11	0.0271588	-0.532704	0.0893121	-0.594383	-0.595165
SNRPA	0.255796	-0.119301	-0.214171	-0.607682	-0.710767
SNRPF	-0.659389	-0.7229	0.078379	-0.0784567	0.174135
SRI	-0.976361	-0.0288957	-0.0277596	-0.200374	-0.0704509
STT3A	-0.853008	-0.186776	0.179509	-0.205183	0.403941
TARDBP	0.0511465	0.715283	-0.196777	-0.666574	-0.0520869
TCEB1	-0.83047	0.261949	-0.457438	-0.128378	-0.126376
UBE2N	-0.973826	-0.104248	0.044483	-0.160108	-0.114812
UGGT1	0.393814	-0.244037	-0.795836	0.179572	-0.346056
VASP	-0.633281	-0.612409	0.0352169	-0.471187	-0.0255661
VPS35	-0.631975	0.05959	0.00455936	0.673296	0.379089
YARS	-0.918549	-0.078456	-0.0106419	0.282781	-0.264637
YWHAH	0.0090255	-0.283743	0.61977	0.58835	0.4349
ACO2	-0.997499	0.0511464	-0.0413181	-0.0204913	-0.0159086
GPD2	-0.0166482	-0.106049	-0.46358	0.372559	0.796724
OAT	0.604242	-0.266817	-0.427106	-0.517373	-0.337055
UQCRC2	-0.853685	-0.368333	-0.328639	0.162765	-0.0325065
BAG3	0.453779	-0.111553	0.72431	0.180774	-0.473642
CRYZ	0.998522	0.025792	-0.030927	0.0364026	-0.00260823
EHD1	0.986025	0.161444	-0.0118712	0.0372274	-0.0128088
EIF3E	0.178771	0.878641	0.186641	0.350599	0.195644
ESYT1	0.859065	0.394763	0.186231	-0.151856	-0.220061
GGH	0.970501	0.129748	-0.201727	0.0203171	0.0136414
HEXB	0.480542	0.694881	-0.445175	0.283925	0.086171
ILK	0.932095	0.0828544	-0.0276059	0.34701	-0.0561835
KIN27	0.673931	0.689081	-0.0967275	-0.157052	-0.192256
KPNA4	0.570349	-0.748488	-0.106855	0.276142	-0.163697
LMAN1	0.981141	-0.000457112	-0.168622	0.0930643	0.0163382
NMT1	-0.332096	-0.557317	-0.758648	-0.0315411	0.0506801
PAK2	-0.74401	-0.276668	0.110939	0.563168	-0.201092
PDXK	0.771612	0.590152	-0.152874	-0.18056	0.0190651
PFDN2	-0.803122	-0.333069	0.145615	0.355982	-0.310052
PPP2R4	0.871831	0.180103	-0.451278	-0.0471051	-0.0400317
RECQL	0.849436	-0.188362	-0.477471	-0.117357	-0.0350329
RPS23	0.461892	-0.093557	-0.173623	-0.807127	0.310329
SCRN1	0.38446	0.802187	-0.370847	-0.0680016	-0.257944
SRSF2	0.800595	0.0404949	0.576266	0.123893	0.0998816
STOML2	0.70222	-0.629833	0.0599987	0.244128	0.216795
TBCB	0.561651	-0.32518	0.587426	0.167153	-0.453647
TMED10	0.976708	0.1951	-0.0810698	-0.0329161	0.0179167
TMED2	0.822687	0.328246	0.446355	0.0885087	0.0915157
UBQLN1	0.957176	-0.0139011	0.285638	-0.00126636	0.0450614
YBX3	-0.878124	0.172426	0.399095	0.17633	0.0937964
AARS	-0.973883	0.118345	-0.193033	0.00394984	0.0164207
ABCE1	-0.3942	-0.771588	0.139604	-0.0923568	0.47036
ACADVL	0.490193	-0.470767	0.0504267	-0.415409	-0.60248
ACLY	0.992103	0.120557	-0.0161625	-0.0304287	-0.00318234
ACOT7	-0.917346	0.0185415	0.0614691	0.199149	0.338664
ACTC1	0.127457	-0.0425111	0.854137	-0.475599	-0.161875
ACTG1	0.467335	-0.343599	0.59267	0.506396	-0.23631
ACTN1	0.989305	0.0780733	0.0252769	-0.106777	0.0560349
ACTN4	0.744996	0.602775	0.247208	-0.0375672	0.138275
ACTR1A	0.684435	-0.0751937	-0.483942	0.526358	0.120999
ACTR2	0.780331	-0.603323	0.163662	-0.00697338	0.0158419
ACTR3	0.633095	-0.0402937	0.416114	-0.445748	-0.475106
ADH5	-0.979842	0.152973	-0.114826	-0.0559826	0.0137648
ADK	0.72992	0.396566	-0.405104	-0.314266	-0.216978
AHCY	0.984412	0.0697384	0.0133427	0.142356	0.0750145
AHNAK	-0.924558	-0.245018	0.049811	-0.0560892	-0.282013
AHSA1	0.807977	-0.542184	-0.194344	0.120836	0.0289612
AK1	-0.0587686	-0.287559	-0.824972	0.1172	0.468552
AK2	-0.127914	-0.350912	-0.728663	-0.538807	-0.198082
AKR1C1	-0.998977	-0.00287008	-0.0119316	0.0405214	-0.0158969
ALDH1A3	0.998156	0.0560858	0.0114473	-0.0192692	0.00610561
ALDOA	0.696462	-0.149462	0.654602	-0.124013	-0.220724
ALDOC	0.855055	0.245064	-0.20512	-0.40756	-0.0254027
ALYREF	-0.521748	0.320612	-0.329173	-0.287665	-0.658697
ANXA1	0.990581	0.0948907	0.0973483	0.0159892	-0.00367384
ANXA2	0.307472	0.559728	0.650288	-0.12916	-0.390652
ANXA5	0.869458	0.468809	0.0170643	-0.0755856	0.135115
ANXA6	-0.996841	0.0476506	-0.0289054	0.0469347	0.0316163
AP2A1	-0.262659	0.791502	0.362433	0.119229	-0.3987
AP2B1	-0.676156	0.419574	0.331648	0.443115	0.245824
AP2M1	-0.395288	-0.308823	-0.368794	-0.497039	-0.604416
APEX1	0.483278	-0.143796	-0.406382	-0.633052	-0.424104
APMAP	-0.991617	0.0144066	-0.0227424	0.125284	-0.0165511
APRT	-0.841574	0.0211086	-0.477994	0.248295	-0.0343425
ARCN1	-0.59043	0.647162	0.0641736	-0.341879	0.334027
ARF1	-0.378458	0.0810652	0.366794	0.147926	0.832933
ARF4	0.791916	-0.435137	-0.0894864	0.375826	-0.185127
ARHGAP1	-0.731635	-0.0368097	0.489595	0.412484	-0.231319
ARHGDIA	0.996627	0.0475191	-0.0242396	0.0592829	0.0193596
ARPC1A	0.711122	-0.403168	-0.541457	0.0940938	-0.17243
ARPC2	0.852495	-0.114611	-0.444107	0.244817	-0.0543074
ARPC3	0.49939	-0.622544	0.129862	-0.553755	-0.198845
ARPC4.TTLL3	0.862119	-0.478388	-0.0124196	0.157551	0.0540296
ARPC5	-0.010091	0.894488	-0.221095	-0.305473	-0.239984
ASNA1	0.363504	0.0272274	-0.515488	0.618838	-0.467371
ASPH	0.982869	0.122866	-0.112551	-0.0786675	-0.00394632
ATIC	0.66895	0.216941	0.39293	-0.248218	-0.537993
ATL3	0.923354	0.347975	0.0304602	0.0232984	0.157672
ATP1A1	0.140669	0.384751	0.0369427	-0.791816	-0.451489
ATP2A2	0.972721	-0.191689	-0.0750799	0.103618	0.0263714
ATP5A1	-0.912589	0.377425	0.00876217	0.134391	-0.0812014
BANF1	0.605293	0.294677	0.215009	-0.660545	-0.25345
BASP1	0.411663	-0.586003	0.666013	-0.192831	-0.0798603
BCAP31	0.362658	-0.0671144	-0.0463511	0.736306	0.565402
BLVRA	0.041523	0.182703	-0.814713	-0.339948	0.430782
BLVRB	-0.962544	0.0384829	0.170242	-0.200603	0.0529606
BSG	0.968058	0.0100586	-0.169214	-0.178154	0.0489004
BUB3	-0.0161515	0.224887	0.260239	-0.633769	0.69266
C1QBP	-0.523321	0.538421	0.489566	0.424236	0.128791
CACYBP	-0.657663	0.506906	0.0690337	0.0246063	0.552408
CALD1	-0.961102	-0.140158	0.197119	-0.0927228	-0.0958429
CALM2	0.870927	-0.200773	0.422983	0.0626051	0.135435
CALR	0.995482	-0.0497519	0.068174	0.0175618	0.0397912
CAND1	0.280056	0.690519	0.171674	-0.506795	-0.398043
CANX	0.975116	0.142027	0.140644	-0.0463951	0.0839257
CAP1	0.987905	-0.0985408	0.0255195	-0.0590282	0.100982
CAPN1	0.792433	-0.219319	0.165419	0.534009	0.106865
CAPN2	0.995859	-0.0288253	-0.00388427	-0.0204428	0.0836672
CAPNS1	0.984228	0.08523	0.142288	-0.0163025	0.0593226
CAPRIN1	0.084345	-0.704046	-0.55182	0.303003	-0.31763
CAPZA1	-0.374224	0.747903	-0.0193316	0.526631	-0.151274
CAPZA2	0.858438	0.382209	-0.202314	-0.273336	0.0368374
CAPZB	0.595161	-0.279227	-0.20615	-0.550095	-0.471926
CARHSP1	0.810475	0.0331161	-0.315049	0.116318	-0.478798
CAST	-0.435424	0.465014	0.550863	-0.479683	0.246215
CAV1	0.883902	-0.106758	-0.42193	0.00126929	0.171154
CBR1	0.895475	-0.279548	0.308273	-0.000966398	0.157936
CBX3	-0.905868	0.312942	-0.0425664	-0.0920052	-0.266821
CCT3	0.472834	-0.0985386	-0.745222	-0.0774829	0.453164
CCT4	0.990195	-0.112561	0.0648124	0.0128589	0.0497755
CCT5	0.805434	0.201736	0.274603	0.474861	-0.0983838
CCT6A	0.853546	0.219393	-0.0935155	-0.192395	-0.421385
CCT7	0.967007	0.215409	0.0350725	0.047642	-0.122459
CD44	0.918336	0.382485	0.033668	-0.0060833	-0.0958845
CDC37	0.961262	-0.186523	-0.15019	-0.136132	-0.00978274
CDC42	-0.224647	0.865827	0.357851	-0.224421	0.146475
CFL1	-0.403943	-0.32699	0.694456	0.496361	-0.035559
CLIC1	-0.958434	0.237426	0.0392151	0.113954	0.102517
CLIC4	0.271566	-0.00511841	0.768451	-0.403613	0.415698
CLTA	0.496236	-0.742332	0.169671	-0.151099	-0.388683
CLTC	0.934555	0.0845425	-0.342902	0.0134561	0.04119
CMPK1	-0.959521	-0.114607	-0.199293	0.156411	0.044747
CNPY2	0.833126	-0.0211058	0.0609806	0.0581698	-0.546218
COL6A3	-0.990625	0.0319997	-0.042933	0.035515	-0.120558
COMT	0.603785	0.715281	0.0152459	-0.342192	0.0805527
COPA	0.840203	0.234678	0.0505811	0.337231	-0.350288
COPB1	-0.614922	-0.26807	-0.247548	-0.689418	0.115892
COPB2	0.616708	-0.497397	-0.49696	-0.253755	-0.246791
COPE	0.00891223	0.282451	-0.170276	0.940541	-0.0808145
COPG1	0.261434	0.134788	0.213862	0.831183	-0.420574
CORO1B	0.25914	-0.517998	-0.334331	-0.733236	-0.122931
CORO1C	0.970947	0.204247	-0.0733689	-0.0164614	0.0994514
COTL1	-0.930065	0.132904	-0.20401	0.256485	0.0995486
CPNE1	-0.965978	-0.039181	-0.0217231	-0.241624	-0.0806089
CPNE3	0.868921	0.382781	-0.23505	-0.0860199	0.189225
CS	0.432061	0.893731	-0.109462	-0.0503448	-0.00715855
CSE1L	0.450561	-0.279478	-0.522762	0.651041	-0.147488
CSRP1	-0.887523	-0.236384	-0.193695	-0.276315	-0.206295
CTPS1	-0.112617	0.0715404	0.903155	-0.350638	0.208721
CTSA	0.921637	0.363978	0.117689	0.0638175	0.0134633
CTSB	-0.800159	-0.0672492	0.0836579	-0.484878	0.33633
CTSD	-0.988922	0.0179126	-0.0839974	0.0372507	0.115196
CTTN	0.7716	-0.611001	-0.11363	-0.0584584	-0.122401
CYB5R3	-0.0123878	0.358285	0.39666	0.32133	-0.781592
CYCS	0.699233	0.681238	0.0588772	-0.194312	0.07593
DARS	0.990499	-0.0800084	-0.0781253	0.0666763	0.0442798
DAZAP1	0.233367	-0.0808	-0.790605	-0.514667	0.221523
DBN1	-0.860137	0.00727507	0.231983	0.0785922	-0.447347
DBNL	-0.862277	-0.318383	0.356639	-0.146023	0.0812152
DDB1	0.875707	-0.419692	-0.219038	-0.00180923	-0.0949515
DDOST	0.716736	0.413453	-0.415512	-0.150165	0.346621
DDT	-0.940049	-0.036739	0.269903	-0.0133229	0.204775
DDX17	-0.962854	0.1281	0.154567	-0.150278	-0.100141
DDX39B	-0.947665	-0.0111514	-0.202235	-0.0407315	0.243412
DDX3X	0.627776	0.728651	0.012307	-0.247705	-0.116002
DDX5	-0.56252	0.459341	0.084153	0.562632	-0.385929
DHX15	0.369413	-0.380577	-0.681054	-0.487479	-0.131241
DHX9	-0.0732289	0.574449	-0.170001	0.260122	-0.753712
DLD	0.812869	-0.373981	-0.0143201	0.281547	0.346278
DNAJA1	0.517297	-0.634452	-0.386971	0.41978	0.0625559
DNM2	-0.537853	0.245305	0.74724	-0.0514162	0.299212
DPYSL2	0.784524	0.56452	0.254964	0.0287529	-0.00263314
DPYSL3	-0.99711	0.0114608	0.0482244	0.0460747	-0.0345294
DSTN	-0.998342	0.0159033	0.0265812	-0.0379481	0.0302265
DUT	0.0697924	-0.491593	0.812548	-0.221931	-0.209707
DYNC1H1	0.941092	0.310039	-0.0914411	0.0324923	0.093831
DYNC1I2	0.918206	0.282835	0.0145329	-0.129848	0.244602
ECHS1	0.111757	0.842822	-0.297752	-0.110501	-0.419875
EEF1A1	-0.909776	0.302415	0.160606	0.232459	0.0319642
EEF1B2	0.981925	0.0237167	0.181615	0.047725	-0.000324006
EEF1D	0.180659	-0.397552	0.805031	-0.358125	-0.181623
EFHD2	0.969943	-0.108036	0.217441	-0.0153012	0.00486615
EHD2	-0.91093	0.244201	0.0741218	0.190752	0.262091
EIF2S1	0.962161	0.169733	-0.193743	0.0875889	0.0151145
EIF2S2	-0.375029	-0.5314	0.640668	-0.252168	-0.320817
EIF2S3	0.50063	-0.475139	-0.0327665	-0.0904688	0.717185
EIF3A	0.660722	-0.383689	-0.465033	0.0673606	-0.442082
EIF3B	0.37549	-0.515129	-0.340982	0.0390805	0.689821
EIF3F	0.898716	-0.243716	-0.296946	-0.0169599	-0.210824
EIF3G	-0.410053	0.397383	-0.0924931	0.730097	0.363795
EIF3I	0.801561	0.0695184	-0.562187	0.126447	0.143612
EIF3L	0.571091	0.465684	-0.662954	0.0435577	-0.12485
EIF3M	0.283559	0.105837	-0.886345	0.0599712	0.345237
EIF4A1	0.834764	-0.319078	-0.282982	0.000638793	0.348252
EIF4A2	-0.957589	-0.0806087	0.261416	-0.0232805	-0.0874341
EIF4A3	-0.111745	-0.38029	0.894958	0.049466	0.198737
EIF4B	0.485597	0.0178457	0.166653	0.835368	-0.195613
EIF4G1	0.682412	-0.723374	-0.025067	-0.0675478	0.0765067
EIF4H	0.908516	-0.138484	0.178928	0.0941239	0.338446
EIF5A	0.933014	0.310304	-0.0487765	-0.0304697	-0.172883
EIF6	-0.405745	-0.105021	0.00521225	0.896056	0.146281
EMD	-0.878624	-0.0903851	0.298852	-0.359745	0.033493
ENO2	0.97295	0.144848	0.17702	-0.0257216	0.0197219
EPRS	-0.935742	-0.11019	-0.260875	-0.159739	-0.136652
ERH	-0.785379	-0.282352	0.177558	-0.38889	-0.347412
ERO1L	0.991392	0.109621	0.0574965	-0.0403725	0.0137367
ERP29	-0.913705	0.232353	0.0722115	-0.255303	0.201895
ERP44	-0.232324	-0.213858	0.86372	-0.335741	-0.203854
ESD	0.874568	0.437423	-0.0265399	0.018169	0.206777
ETF1	0.308438	0.0259314	0.0875092	-0.60058	0.732011
ETFA	-0.894651	-0.0765411	-0.403584	-0.098123	-0.145713
FAF2	-0.159214	0.918401	0.0982545	0.0580871	-0.343747
FAM129B	0.965909	0.244452	0.0417105	0.0648558	0.0363008
FARSA	0.547815	0.401583	0.0387554	0.730561	-0.0583832
FASN	-0.984149	0.0553589	-0.0945274	0.136845	0.0269288
FH	-0.784007	-0.350945	0.339276	0.184603	-0.336132
FKBP10	0.976291	0.166709	-0.0997851	0.0130222	0.0945385
FKBP1A	-0.986015	-0.131192	-0.0479797	0.0792623	-0.0444877
FKBP3	0.763548	-0.49739	0.154649	-0.210178	0.3186
FKBP4	0.764155	-0.495	0.0492229	-0.378226	0.159889
FLNA	-0.998163	0.0298979	0.0335738	0.01558	-0.0375001
FLNB	0.784061	0.382203	0.234502	-0.169336	-0.394339
FSCN1	0.991499	-0.0978324	-0.0741529	0.0420487	0.00957137
FTH1	0.654909	-0.224337	0.656217	-0.166061	-0.250142
FUBP1	-0.975853	-0.0439233	0.159227	-0.116777	-0.0824055
FUS	0.585833	-0.170025	-0.141742	0.618533	0.47457
FXR1	-0.240265	-0.726806	-0.00471395	0.0353653	0.642458
G3BP1	-0.884631	-0.135426	0.155255	0.108504	-0.403994
G6PD	-0.998923	-0.0178447	-0.0117636	0.0130891	0.0390424
GAPDH	0.96904	0.192884	-0.150899	0.0220423	0.0223551
GARS	-0.918646	0.17308	-0.122266	0.264437	0.20312
GART	0.458046	0.672786	-0.519606	0.0344534	0.257633
GBE1	0.907342	0.0433478	-0.413562	-0.0505578	-0.0355132
GDI1	0.946138	0.270124	0.0924159	-0.127898	0.0834074
GDI2	0.860836	0.0522621	-0.107164	0.333496	0.365414
GFPT2	0.86978	0.204315	0.445711	0.0496917	0.0247
GLRX3	0.365703	-0.734263	-0.558672	-0.0423725	-0.114933
GNAI2	0.875443	-0.305528	-0.19351	0.0720459	0.312436
GNB2	0.328068	-0.118087	-0.564911	-0.707317	-0.242911
GNB2L1	-0.103682	0.0119928	-0.239235	-0.176569	0.94905
GOT2	-0.964451	0.0136783	-0.00443009	-0.223019	0.141034
GPI	-0.998377	-0.0061727	0.016363	-0.031462	-0.0441379
GSN	-0.988312	0.146371	0.0268102	0.0151626	0.0294295
GSPT1	0.765747	0.536254	-0.185578	-0.265489	-0.145396
GSTO1	0.983751	-0.126396	0.126702	0.0070897	0.0124035
GSTP1	-0.986463	0.0180913	-0.0947938	0.0458681	-0.12439
H2AFV	-0.978949	0.0439951	0.00906617	0.15426	0.125877
H2AFY	-0.970895	0.11067	-0.135591	0.160596	-0.0306346
HADHA	0.0820306	0.87643	-0.32077	0.34963	-0.00252007
HADHB	0.041624	0.663961	0.275827	-0.59184	-0.362033
HARS	-0.132848	0.902159	0.274482	0.262121	0.156247
HDGF	-0.749679	-0.210456	-0.335161	0.321147	0.422162
HDLBP	0.621209	0.18268	0.217628	-0.457989	0.568868
HINT1	-0.465675	-0.640513	0.0437748	0.454643	-0.405307
HIST1H1B	-0.958399	-0.0379246	-0.0267907	0.157934	0.23318
HIST1H1C	-0.970413	0.0539074	-0.0389084	0.226977	0.0485829
HIST1H2AJ	-0.795331	0.155841	-0.164904	0.329811	0.455185
HIST1H2BN	-0.981053	-0.132665	0.0630204	-0.126262	0.00457617
HIST1H3A	-0.98778	-0.0330137	-0.0418518	0.092366	0.113657
HIST1H4A	-0.998866	-0.0355707	0.0143165	0.015893	0.0233297
HIST2H2BE	-0.935518	-0.0546299	0.23633	-0.12693	0.223289
HIST2H3PS2	-0.699895	-0.081165	0.587076	0.357293	-0.176757
HK1	0.99391	-0.0897971	0.00313488	-0.0635546	-0.00551395
HLA.B	-0.558349	-0.793934	0.11824	-0.0353896	0.206599
HM13	0.663546	0.00350871	0.202228	-0.687995	-0.213216
HMGB1	0.981414	0.0666726	0.16483	-0.0716717	-0.00865687
HN1	0.941912	-0.320125	-0.00189606	-0.0268597	0.0979687
HNRNPA0	-0.838311	0.2886	0.371498	0.159846	0.224463
HNRNPA1	0.83991	-0.0235627	0.410404	-0.348519	0.0640193
HNRNPA2B1	-0.932683	-0.134737	0.212712	-0.258123	-0.00862673
HNRNPA3	-0.988202	-0.0296937	0.0683113	-0.13375	0.00448552
HNRNPAB	-0.96021	0.0556119	-0.00511693	0.127949	0.241883
HNRNPC	0.984102	0.0959595	0.139138	-0.0362614	0.0407611
HNRNPD	0.776453	0.442661	0.440702	-0.0111553	-0.082644
HNRNPDL	0.327057	0.620392	-0.272104	-0.447389	0.483684
HNRNPF	-0.234765	-0.0189883	0.837035	-0.386261	0.307732
HNRNPH1	-0.980961	0.00654566	-0.0475877	-0.1728	0.0744911
HNRNPH3	0.869295	0.314391	0.295331	0.225772	-0.0853905
HNRNPK	-0.945989	-0.0304006	0.178197	0.138471	-0.230767
HNRNPL	-0.948765	-0.13342	0.00686046	-0.222392	0.180385
HNRNPM	-0.988914	-0.0539125	0.11553	-0.0748185	0.0140226
HNRNPR	-0.704121	0.422195	-0.276678	0.0911229	-0.491031
HNRNPU	0.999197	-0.0118494	-0.0340944	0.00151813	-0.0173163
HNRNPUL2	0.329262	0.0686029	0.796304	0.38914	0.318355
HPCAL1	0.805314	-0.428157	-0.0324157	-0.205215	-0.353535
HPRT1	0.68959	0.249496	0.134004	-0.650633	-0.144694
HSP90AA1	0.999258	0.0262003	-0.0040316	-0.00203192	0.0278824
HSP90AB1	0.99257	0.0144648	0.0650803	-0.0704486	0.0734607
HSP90B1	0.995583	0.0834825	0.027952	-0.0231385	0.0229835
HSPA4	-0.815279	0.371906	-0.342975	-0.24182	-0.144559
HSPE1	0.531963	-0.475126	0.33038	-0.399779	-0.471484
HSPH1	-0.927398	0.0483925	0.312977	-0.169822	0.103912
HYOU1	-0.978161	0.0509951	-0.0658776	0.186132	-0.0402007
IARS	-0.759652	0.05302	-0.570076	0.307974	-0.016842
IDH1	-0.950752	0.0995354	-0.0324536	-0.273509	-0.101502
IDH2	-0.992297	-0.0228606	0.00284542	-0.120946	-0.0137255
ILF2	-0.913539	0.362918	-0.13836	-0.0680375	0.0998192
ILF3	-0.980721	0.110537	-0.13759	-0.0776239	-0.0318122
IMPDH2	0.980955	-0.0545675	0.147072	-0.0272257	0.111259
IPO5	0.961705	0.212979	-0.111648	-0.12789	0.0307047
IQGAP1	0.982909	0.160931	-0.0650531	0.00255541	0.0612579
ITGA2	0.95474	0.171049	-0.0486723	-0.0955269	0.218446
ITGB1	0.995667	0.0629318	0.0216476	-0.0240931	0.0603082
KARS	-0.679754	0.157792	0.158701	0.375518	0.588929
KHDRBS1	0.423756	0.815676	0.0391771	-0.345853	0.18427
KHSRP	-0.803576	-0.461919	-0.0747693	0.0377299	0.365898
KIF5B	0.995365	-0.0381753	0.0690618	-0.0108652	0.0538888
KPNB1	0.466866	0.707638	-0.296218	-0.174746	0.403736
KRT10	0.687569	-0.381805	-0.583805	-0.0438468	-0.196782
KRT14	0.426977	-0.41133	-0.734499	0.190458	-0.269697
KRT2	0.586036	-0.521486	-0.544983	-0.140049	-0.260757
KRT9	0.490581	-0.569399	-0.636627	-0.0183634	-0.17171
KTN1	0.938378	-0.118107	0.275612	0.16026	-0.0620692
KYNU	0.914502	-0.340156	0.159733	0.131644	-0.0716568
LAP3	0.976112	-0.0472006	-0.0393375	0.163821	0.128813
LASP1	0.15001	-0.488656	0.767892	-0.202748	0.328554
LDHA	0.950793	0.0664092	0.213266	0.202903	0.0702157
LDHB	0.98096	0.140026	-0.0103043	-0.0613757	0.119318
LGALS1	0.963586	0.0572061	0.256982	0.0358287	-0.0300968
LGALS3	0.741158	-0.606585	-0.238616	-0.0872271	-0.134881
LMNA	-0.771123	-0.0913875	0.60471	-0.163109	-0.068836
LMNB1	-0.980339	-0.0851504	0.0545021	0.158164	0.0608182
LMNB2	-0.653955	0.147292	-0.102576	-0.0912547	-0.729245
LONP1	0.519503	0.803407	0.0452576	-0.261057	0.120225
LRRC59	0.787585	-0.198584	-0.454651	0.354044	-0.09066
LUC7L2	0.534082	-0.506774	-0.438365	-0.0690087	-0.510892
MAGOH	-0.0153591	0.923216	0.197274	0.211549	0.252521
MAP1B	0.985314	0.0671516	0.135622	-0.0781205	0.0122576
MAP4	0.890043	-0.0702335	0.439936	-0.0966471	0.00254977
MAPRE1	0.592438	-0.677199	0.262494	-0.235793	0.256745
MARCKS	-0.883566	-0.262622	0.348506	-0.0712217	-0.154314
MATR3	0.841348	0.35266	-0.127777	-0.382204	0.0731881
MCFD2	0.841183	0.041472	-0.41961	0.113138	-0.319089
MCM3	0.458739	-0.452253	-0.719424	0.236697	0.106904
MDH1	0.114588	0.721405	0.632025	0.109271	-0.234625
MDH2	0.680707	0.593101	0.329416	0.061365	-0.269424
MIF	-0.571594	-0.461186	-0.177911	-0.648181	-0.0937903
MTCH2	-0.146426	-0.817418	0.480979	-0.0752121	0.270906
MTHFD1	0.968015	0.220693	-0.019362	-0.109383	0.0436184
MYDGF	0.695262	-0.529675	0.257131	-0.348151	0.22075
MYH9	-0.791262	0.215968	0.545578	0.0643192	-0.15959
MYL12B	-0.906981	0.186777	-0.0889103	0.0360009	-0.365101
MYL6	-0.250586	0.073503	0.889278	0.276181	-0.254388
MYO1C	-0.922521	0.136205	0.162485	0.210189	-0.244588
MYOF	0.727153	0.525206	-0.0344695	-0.331554	-0.29033
NACA	0.812941	-0.421524	0.33389	-0.0214678	0.222487
NAMPT	0.990256	0.123054	0.0351027	-0.048372	0.0260685
NAPA	0.81637	-0.0072559	0.29379	-0.462876	0.18144
NCL	0.994595	0.0190476	0.0694087	0.0566439	-0.0489101
NDRG1	0.740035	0.659651	0.107271	0.0345772	-0.0671242
NME1.NME2	0.0388149	-0.465246	0.768652	0.41661	0.132856
NONO	-0.940592	-0.000453339	0.137585	0.144018	0.274984
NPEPPS	-0.237705	0.244768	0.637813	0.652666	-0.225406
NPM1	-0.601891	0.57993	0.227065	0.477865	-0.146608
NQO1	-0.998786	0.011941	-0.0327347	0.0347885	0.00167822
NUDC	0.986713	-0.0904079	-0.0246702	-0.0212636	-0.131006
OLA1	-0.975098	0.110816	-0.110435	-0.010577	-0.156829
OTUB1	-0.920329	0.306069	-0.209167	0.122058	-0.0258278
P4HA1	0.957292	0.0861073	0.248794	-0.114111	-0.0354716
P4HA2	0.996467	0.0616733	0.0553871	-0.01223	-0.00569848
P4HB	0.990647	0.0705679	0.112514	0.0288377	-0.0121416
PA2G4	0.957622	0.10655	-0.0970184	-0.126858	-0.214713
PABPC1	0.849734	0.0680806	0.518808	0.0606057	-0.0219783
PAICS	0.982102	0.0290825	-0.0409212	-0.118997	-0.137096
PCBP1	-0.34082	0.795435	0.197337	-0.452972	0.0836634
PCBP2	-0.727478	-0.0295833	-0.226559	-0.6314	-0.141089
PCMT1	0.782102	0.518765	0.244501	-0.123822	-0.209967
PCNA	-0.97116	-0.10652	0.120211	0.0663538	-0.163245
PDIA4	0.983967	-0.039362	0.162633	0.0148194	-0.0599187
PDIA6	0.981425	0.0859184	-0.144886	-0.0481614	0.0781812
PEA15	0.741364	-0.617913	-0.187548	-0.0754524	-0.166421
PEBP1	0.959636	-0.0757137	0.233558	-0.0766354	0.11377
PFKL	-0.974417	-0.0151674	-0.0550054	-0.0807245	0.20184
PFKP	0.980942	0.113461	-0.154871	0.025092	0.0162864
PFN1	0.822692	0.331133	0.276852	-0.0541158	0.365996
PFN2	-0.980902	0.149044	-0.0891373	-0.0472242	0.073767
PGD	-0.998941	-0.0142972	-0.0290898	0.0263988	-0.0192083
PGK1	0.98595	0.134037	0.076756	-0.0389215	0.0503005
PGLS	-0.325889	-0.525248	-0.618284	-0.477855	0.0853828
PGM1	0.673181	-0.0435922	-0.735345	0.0556399	-0.0331454
PGRMC1	0.913307	0.363945	0.0360876	-0.178744	-0.0127507
PHB2	0.638727	0.182092	0.148744	0.435307	0.589282
PIN4	-0.5465	-0.491996	-0.344102	0.504949	0.293083
PKM	0.982412	0.159493	0.0226331	0.0867332	0.0373321
PLEC	-0.968982	0.145939	-0.120206	-0.0821847	-0.136275
PLIN3	0.997588	0.0338053	-0.0542631	-0.0115242	0.0244552
PLOD2	-0.638562	-0.483685	-0.347959	0.30548	-0.379333
PLS3	0.945432	-0.00960172	0.323682	-0.0343206	0.0108627
POFUT1	0.856466	0.299657	-0.231029	-0.279091	0.213085
PPA1	0.95571	-0.128345	-0.0277539	-0.158423	0.210424
PPIA	-0.981304	0.0139736	0.0752571	-0.139337	-0.108483
PPIB	-0.60149	-0.0781464	0.771157	-0.049464	0.187014
PPP1CB	-0.776215	0.444838	-0.116201	-0.293734	0.315955
PPP2R1A	0.821161	0.433993	0.252805	-0.242136	0.121678
PRDX3	0.663899	-0.645924	0.247976	0.243664	0.145454
PRDX4	0.905382	-0.0907505	-0.411952	-0.0289962	0.0387579
PRDX5	-0.198153	-0.737935	-0.621828	-0.0950627	-0.143108
PRKAR1A	0.502879	0.800498	-0.0830747	-0.258484	0.180555
PRKCSH	0.93758	0.12435	0.13103	0.201258	0.218648
PRKDC	-0.954932	0.185877	0.088787	0.164249	0.136725
PRMT1	-0.564867	0.591215	0.394682	-0.241767	0.342295
PSMA1	-0.225037	0.736468	0.28627	-0.146067	-0.551078
PSMA2	0.309076	0.528411	-0.227599	0.366348	0.662753
PSMA4	0.577401	-0.259703	-0.389247	0.552957	0.37668
PSMA5	0.180192	-0.238175	-0.66286	0.632824	-0.266371
PSMA6	0.911441	0.0984615	-0.0630162	0.203493	0.337936
PSMA7	-0.386493	-0.101089	-0.431879	0.576609	-0.566927
PSMB1	-0.0804719	-0.655542	0.0512817	-0.510975	-0.54778
PSMB2	-0.205806	-0.135614	0.947044	0.195926	0.0630343
PSMB4	0.835227	-0.028989	-0.464923	0.28991	-0.0367996
PSMC1	0.906794	0.37505	-0.0264648	0.00846685	-0.190498
PSMC2	0.972527	0.0350632	-0.229911	0.00240097	0.00979258
PSMC3	0.140566	-0.547731	0.038335	-0.773477	0.283718
PSMC4	0.511154	-0.355783	-0.735374	-0.224649	-0.14456
PSMC5	0.426951	0.465191	0.34939	-0.106836	-0.683976
PSMC6	0.477747	0.206394	-0.14108	-0.709515	0.4537
PSMD1	0.312725	0.584033	-0.0971466	0.0242573	-0.742349
PSMD11	0.916014	0.233184	-0.268103	-0.0257607	0.184394
PSMD12	0.443746	-0.101002	-0.577166	0.519387	0.435895
PSMD13	0.603181	0.300513	-0.392672	0.102684	0.617357
PSMD2	0.989502	0.103179	-0.0344841	-0.0399626	0.0863314
PSMD3	0.7105	-0.288631	-0.33382	0.306597	0.454361
PSMD4	0.0745089	-0.804877	0.360332	0.432575	0.172226
PSMD7	0.549437	0.180953	-0.432695	0.193742	-0.663788
PSME1	0.0510298	0.904955	-0.312617	-0.164124	-0.231921
PSME2	-0.265645	0.180248	-0.856715	-0.348516	-0.203763
PTBP1	-0.89973	0.308607	0.0504817	0.301811	-0.0401192
PTGES3	0.96753	0.205292	0.0736548	-0.0126876	0.127105
PTRF	0.962066	0.121574	-0.00318178	-0.129616	0.206975
PUF60	-0.671459	0.285671	-0.67863	0.0782668	0.0294912
PYGB	-0.965427	0.119722	-0.0660516	0.217186	0.0456589
QARS	-0.903645	0.406117	0.0776538	0.0352024	0.105952
RAB11B	0.69865	-0.0641745	0.14109	0.69171	0.0969592
RAB14	0.36835	0.0366705	0.903746	0.117671	-0.179919
RAB1A	0.934342	-0.153716	-0.124723	-0.245733	-0.16564
RAB2A	0.273508	0.258196	0.442714	-0.56444	0.586465
RAB5C	0.896897	-0.108062	-0.306291	-0.0239615	-0.299181
RAB7A	0.987585	0.0242708	0.130418	0.0757122	0.036693
RAC1	0.734653	0.487395	0.470255	-0.0184574	0.0353806
RAD23B	0.924045	0.215144	-0.289373	0.0412858	0.120051
RALY	-0.501893	0.299585	-0.0160531	-0.474656	0.657873
RAN	0.950491	0.0246917	0.230728	0.113721	-0.172594
RAP1B	0.833887	-0.172413	0.458269	0.251311	0.0416971
RARS	-0.205145	0.215313	-0.0255277	-0.589119	-0.750894
RBBP4	-0.94655	0.0102493	0.193472	-0.253285	0.0485203
RBM8A	0.442604	-0.547691	-0.371077	-0.0716983	0.60108
RBMX	-0.239352	-0.555634	0.0505725	0.151198	0.780104
RCN1	0.674084	-0.251526	0.658411	0.220827	-0.00868526
RHOA	0.978828	0.0841824	0.179413	0.0434302	0.027087
RNH1	-0.991057	0.0610311	0.0243945	0.115198	0.0146538
RPL10	-0.197931	0.4011	0.833346	-0.259371	0.195458
RPL10A	-0.956583	0.143102	0.25357	0.00545832	-0.0119348
RPL11	-0.71424	-0.0972424	0.404715	-0.521366	0.211632
RPL12	-0.534771	0.328023	-0.591947	0.358956	-0.356609
RPL13	-0.605656	-0.652277	0.0353043	-0.206463	0.404774
RPL13A	-0.610234	-0.116218	-0.716441	-0.283062	0.143862
RPL14	-0.131062	0.396651	-0.879745	0.101306	0.203166
RPL15	0.789706	-0.397917	0.0615822	-0.194887	0.419826
RPL17	0.206367	0.210921	-0.779384	0.226979	0.503951
RPL18	-0.607737	-0.483889	-0.482212	-0.0958306	-0.39344
RPL18A	0.321987	0.0719155	0.41292	0.246143	0.812443
RPL19	0.60249	-0.530331	0.236024	-0.166943	0.521706
RPL22	0.0502537	0.970409	-0.099079	-0.163268	0.138949
RPL23	-0.000175335	0.108354	0.23878	-0.964813	-0.0194928
RPL23A	-0.908864	-0.150792	0.264504	0.269695	0.0923552
RPL24	-0.303595	0.691676	0.410863	-0.30791	0.407183
RPL27	0.291903	0.326528	-0.606788	0.319619	0.581227
RPL27A	0.910539	-0.0104561	-0.408597	-0.0242324	0.0571951
RPL3	-0.45059	-0.865466	-0.0750284	-0.0635819	0.195617
RPL30	0.171358	-0.0215536	-0.78703	0.242504	0.540322
RPL31	-0.596793	-0.413434	0.453611	0.145506	-0.495959
RPL32	-0.240287	0.0486488	0.804417	0.0932885	0.533016
RPL36	0.592301	0.735281	0.264004	0.0503802	-0.190539
RPL37A	0.252743	-0.842593	0.445641	-0.137121	0.0935995
RPL38	0.909496	0.270954	0.195622	0.120099	0.216124
RPL4	0.0857048	0.269242	0.042482	-0.629838	0.722262
RPL5	-0.867544	0.224479	0.216104	-0.374999	0.0982422
RPL6	-0.529084	-0.189973	0.807657	-0.0314349	-0.175163
RPL7	-0.078666	-0.186141	0.966367	-0.0229602	0.157386
RPL7A	0.061301	-0.607746	0.752255	0.0209709	-0.24609
RPL8	-0.498553	0.0057665	0.833486	0.0675141	0.228374
RPL9	-0.0475227	0.0571766	0.607858	-0.773095	0.165241
RPLP0	0.902225	0.22679	0.356586	-0.0299344	0.0806685
RPLP1	0.403946	0.756454	0.390979	0.164801	-0.29083
RPLP2	0.689188	0.0827604	0.540958	0.436492	-0.18711
RPN1	0.124748	0.191714	-0.74386	-0.565243	0.273599
RPN2	0.696321	-0.277972	-0.561758	0.308819	0.1641
RPS10	0.293985	0.744671	-0.139885	-0.205343	0.545256
RPS11	-0.477664	0.299996	-0.281502	0.770003	-0.0984503
RPS12	-0.698964	0.329719	-0.209944	-0.58495	-0.128419
RPS13	-0.0515834	-0.415488	0.451117	-0.678996	0.400207
RPS14	-0.405665	-0.892234	0.161625	-0.0407154	0.107581
RPS15	0.114636	-0.288875	-0.566379	-0.556744	-0.522169
RPS15A	0.48746	-0.430552	-0.477482	0.510817	0.296789
RPS16	0.480078	0.611093	-0.482148	0.347757	0.206612
RPS17	-0.160069	0.839985	-0.492844	0.0783554	0.140597
RPS18	-0.869751	-0.105108	0.439158	0.0146611	-0.198523
RPS19	-0.461807	0.737014	0.154836	0.373423	0.283066
RPS2	0.143262	0.74353	-0.6178	-0.0204573	-0.211055
RPS20	-0.544929	-0.0342811	0.560482	0.538178	0.31321
RPS21	-0.614166	-0.235412	0.379367	0.505034	-0.410369
RPS24	0.161412	0.693195	-0.541566	-0.0958329	0.436977
RPS25	0.177738	0.672389	0.151943	0.264703	0.650498
RPS27A	0.561751	0.176306	0.766593	0.157451	-0.202229
RPS3	0.290485	-0.587228	-0.690564	0.302052	0.051661
RPS3A	0.0856228	-0.0131464	-0.915917	-0.0501876	-0.388682
RPS4X	0.398018	0.41743	0.624838	0.454516	0.265192
RPS5	-0.272561	0.463732	-0.558192	0.579428	0.25169
RPS6	0.502061	-0.151585	0.489131	0.380187	0.584094
RPS7	-0.0164572	0.969261	-0.182469	0.0261759	-0.162116
RPS8	0.194549	-0.71542	0.588172	-0.0844595	0.311841
RPS9	0.633189	-0.449697	-0.546897	0.15975	0.268752
RPSA	0.702251	0.529216	0.205156	0.371194	0.216566
RRBP1	-0.9843	-0.0964049	0.117074	-0.0827372	-0.0361697
RTN4	0.986581	-0.0441761	0.118145	-0.0841601	0.0605372
RUVBL1	-0.479514	0.606875	0.356588	0.444904	0.276901
RUVBL2	-0.686936	0.688251	-0.128055	0.143322	0.132254
S100A6	0.0564752	-0.407602	-0.0466151	-0.733002	-0.539635
SAR1A	0.608796	0.587678	0.293777	0.435106	-0.0915429
SEC13	0.801277	-0.132432	0.0617101	-0.28799	0.503657
SEC22B	0.161664	-0.865721	0.0139726	0.46251	-0.101397
SEC23A	0.582023	-0.351961	0.466177	0.247489	-0.508725
SEC31A	0.552033	0.214484	-0.390561	0.239475	-0.66285
SEC61A1	0.84983	-0.158888	0.476795	-0.143137	-0.0687149
SEC61B	0.765984	-0.27126	-0.228412	-0.2146	-0.491387
SERBP1	-0.771348	-0.626704	0.109071	-0.0111573	-0.0155796
SERPINB6	-0.82887	0.229848	-0.174528	0.381313	0.290319
SERPINH1	-0.984574	-0.0459764	-0.088907	0.0995674	0.10335
SET	0.670411	0.560306	0.176649	-0.236519	-0.3866
SF1	-0.0688229	-0.292432	0.107771	0.605635	0.728929
SF3B2	0.0536692	-0.331928	0.582492	0.485759	-0.558288
SFPQ	-0.930427	0.289533	0.218953	-0.0407849	-0.0295272
SH3BGRL3	0.999425	-0.022061	0.00942511	-0.0175464	0.0163301
SHMT2	-0.986104	0.0160639	-0.0830929	-0.0826122	-0.116673
SKP1	-0.886469	-0.097732	-0.0676306	-0.352629	-0.275137
SLC16A3	0.871914	-0.288619	0.135654	-0.0668373	0.365508
SLC25A3	-0.943317	0.204047	-0.0327971	0.257283	0.0353291
SLC25A5	-0.949728	-0.129278	-0.245758	-0.0185265	0.143397
SMS	0.993235	0.0293633	-0.0925876	-0.0448483	0.0451494
SND1	0.986925	0.110397	-0.110717	-0.0093731	0.0380076
SNRNP70	-0.888625	-0.164357	0.106295	0.357195	0.210819
SNRPD3	-0.710762	0.543466	-0.0608971	0.193037	0.398109
SNRPE	-0.384895	0.900473	0.00574798	0.0103957	-0.202144
SOD1	-0.9509	0.187285	-0.050457	0.143658	-0.193724
SPTAN1	0.952804	0.0720132	0.284376	0.051182	0.0590731
SPTBN1	0.842731	0.473373	0.237625	0.0847073	0.0456249
SRM	0.974793	-0.0273447	-0.0907784	0.129644	-0.154865
SRSF1	-0.781255	-0.173162	0.505869	-0.265299	0.182673
SRSF7	-0.502645	0.435649	0.464925	-0.222436	-0.540301
SSB	-0.899142	-0.214795	-0.000549714	0.347558	-0.156876
SSBP1	0.76544	0.0118339	0.507765	0.358123	-0.166985
SSR4	-0.923529	0.286124	-0.158955	0.177217	0.0924952
ST13	-0.883645	0.309996	0.289588	0.166398	-0.107353
STIP1	0.875461	0.254868	0.402526	0.0259895	0.0768657
STMN1	-0.933361	-0.118976	0.289643	-0.134894	-0.112216
STRAP	0.917254	-0.20165	-0.315563	0.123765	0.0555504
STT3B	0.750276	-0.34615	-0.549725	0.103054	-0.0666995
SUB1	0.756712	-0.0544357	-0.425166	0.493542	-0.00866396
SUMO2	-0.872143	-0.335529	0.272665	-0.118429	-0.195998
SURF4	0.71961	0.611831	-0.0429865	-0.306128	0.110735
SYNCRIP	0.838277	0.37076	-0.3886	0.0612475	-0.0711919
TAGLN2	0.934534	0.32631	0.113817	-0.0056589	0.0847493
TALDO1	-0.997719	-0.0422387	-0.012944	-0.0498371	0.0110535
TARS	-0.590461	0.187486	-0.639209	0.00332276	0.455637
TBCA	-0.492724	-0.244833	0.808151	0.204746	-0.0474471
TECR	0.350457	-0.433215	0.641858	0.401995	0.340473
TFG	-0.331743	-0.0802148	0.0987337	0.930486	0.0892148
TKT	-0.999412	-0.0103442	-0.025553	0.020207	0.00261062
TLN1	0.983399	0.173481	-0.0460078	0.0265593	-0.00278144
TMEM189.UBE2V1	0.349855	-0.516608	-0.531513	-0.0355357	-0.571794
TMEM43	0.382995	-0.168769	-0.558175	0.414604	-0.584275
TOP1	0.592358	-0.371856	0.162513	0.648221	0.253446
TPD52L2	0.942411	-0.13062	0.226519	0.118662	-0.171487
TPP1	-0.930475	0.300373	-0.111161	-0.0524818	0.169945
TPT1	0.982849	0.0356745	0.0244143	-0.175664	-0.0357844
TRIM28	-0.98774	0.0413652	0.0287877	-0.00949998	-0.147444
TSN	0.209425	0.596466	0.185472	-0.748468	0.0759248
TUBA1A	0.00180341	-0.83378	-0.0169142	0.550558	-0.0375152
TUBA1B	-0.853819	0.103673	0.0139668	0.457256	-0.225757
TUBA1C	-0.546596	0.34597	-0.620296	0.430691	0.106188
TUBB	-0.964122	0.248202	-0.0162356	-0.0851519	0.0367469
TUBB3	0.928244	-0.0839476	0.221431	0.274631	-0.0828352
TUBB4B	0.486334	-0.802186	0.125113	0.288878	-0.144476
TUBB6	0.896543	0.43037	-0.0132391	-0.0991815	-0.0312994
TUBB8	-0.930734	0.330981	-0.00465263	-0.136039	0.0752132
TUFM	-0.986102	0.112035	-0.00626931	0.078247	-0.0942794
TWF1	0.680212	0.0846967	0.651474	0.188639	0.264832
TXN	-0.986151	0.0112915	-0.0846577	0.0258152	0.139807
TXNDC17	0.775314	0.440396	0.222157	0.311501	0.241976
TXNDC5	-0.973812	0.00985331	-0.126591	-0.0675177	0.176092
TXNRD1	-0.996067	0.025616	-0.0283275	0.0793479	-0.00974954
U2AF2	-0.964838	-0.165851	-0.115567	0.025989	-0.165982
UBA1	-0.877487	0.392746	-0.0892112	0.242145	0.0957815
UBE2L3	-0.95101	-0.113126	-0.0827053	0.103477	-0.25541
UCHL1	0.990887	-0.0988343	0.0349078	0.0473041	-0.0701383
UGDH	-0.993168	0.0205997	0.00285769	-0.0945702	-0.0651238
UGP2	0.991788	-0.0153514	0.0806842	-0.0256475	-0.0946216
UROD	-0.148057	-0.231174	0.878451	-0.165442	-0.354387
USP14	0.955973	0.184483	0.104986	0.202332	0.0110262
USP5	0.92292	0.139459	-0.311539	0.0435727	0.17267
VAPA	0.549119	0.313485	0.717135	0.0949486	0.277305
VAT1	0.961074	-0.260665	-0.0166454	-0.0346704	-0.0831307
VBP1	-0.264085	0.804055	-0.0785389	0.266557	-0.45446
VCL	0.660395	0.293007	0.658902	-0.183163	-0.101613
VCP	0.837088	0.467422	-0.00620073	-0.277737	-0.060196
VDAC1	0.949666	0.0670933	-0.172564	-0.173581	0.183642
VDAC2	0.969074	0.0738807	-0.216788	-0.0464875	0.0792417
VDAC3	0.0153118	-0.565775	-0.725328	0.154741	0.360025
WARS	-0.994037	0.0324395	-0.064213	0.0776229	0.0262749
WDR1	0.99189	0.0632679	-0.00082561	0.00920166	0.109848
XPO1	-0.110893	0.119593	-0.157304	-0.567491	0.791586
XRCC5	-0.998236	-0.0240938	0.0332468	0.0393063	0.0171375
XRCC6	-0.992065	-0.0168322	-0.119834	0.0244478	-0.0237752
YBX1	-0.480615	-0.756606	0.283976	-0.132896	-0.313452
YWHAB	-0.492316	-0.483274	0.321705	-0.51912	-0.388705
YWHAE	-0.952785	0.0923392	-0.13227	-0.210204	0.1483
YWHAG	0.0164497	-0.781077	-0.200401	-0.547189	-0.223767
YWHAQ	0.957244	-0.0637892	0.094517	-0.254553	0.0767115
YWHAZ	-0.176276	0.0100307	0.951374	0.248324	-0.0452611
ZYX	0.729411	-0.511941	0.412962	0.0943894	-0.162574
AKR1B1	0.934893	-0.105971	0.0760009	0.275765	0.181448
ANXA4	-0.838075	0.114322	-0.0892968	0.329774	-0.409678
ATP5B	-0.971524	0.0543692	-0.13357	-0.186429	-0.0242651
CALU	0.991454	0.0889763	0.0936138	0.00667258	0.0171594
CCT2	0.909799	0.383831	0.0739873	0.129061	0.0530064
CCT8	0.694496	-0.505664	-0.0821534	0.365839	-0.348413
CKAP4	-0.971671	-0.192732	0.125915	0.0313279	-0.0432806
CYB5B	-0.958759	0.0830528	0.183319	0.191721	-0.0593272
EEF1G	0.888158	0.282522	-0.258546	0.0617929	0.246358
EEF2	0.965526	0.137992	0.108011	0.142319	0.129604
ENO1	0.99026	0.0658135	0.120487	-0.011508	-0.0200838
GANAB	-0.991071	0.0211571	-0.0541049	0.0726813	0.0955011
GLUD1	-0.515178	-0.412525	-0.55765	0.0904794	0.495232
HLA.A	-0.990628	-0.0362611	-0.0717869	0.00974119	0.109968
HSPA1A	-0.994043	-0.0178644	-0.0232452	-0.0305454	-0.100433
HSPA5	0.931786	0.0122311	0.28604	-0.222145	0.0213976
HSPA8	0.922754	0.265134	0.24313	-0.0143705	-0.137516
HSPA9	0.4773	-0.429865	0.569293	-0.448284	0.249696
HSPB1	-0.956061	-0.111347	-0.182175	-0.109884	-0.168189
HSPD1	0.951385	-0.131395	0.170378	-0.0846155	-0.203503
IMMT	-0.149917	0.412559	0.88095	0.175669	-0.019685
KRT1	0.579957	-0.471324	-0.627419	-0.0738553	-0.2059
LMAN2	0.971706	-0.0404094	-0.113285	-0.18685	-0.0800532
MSN	-0.984715	0.107992	0.112751	-0.0638334	0.0434398
MVP	-0.279765	-0.609638	0.346195	0.588193	-0.29026
PARK7	0.469295	0.692403	0.411976	0.298879	-0.203193
PDCD6IP	0.659658	-0.531971	-0.120683	0.0481781	0.514755
PDIA3	0.989735	0.0371597	0.0656307	0.0599664	-0.105544
PGAM1	0.993283	0.0693211	0.08343	0.0190128	0.0355199
PHB	0.939916	0.211649	-0.0989484	0.191568	-0.158977
PHGDH	-0.995345	0.0871159	0.0266137	-0.0303943	-0.0081792
PRDX1	-0.999117	-0.0263117	-0.0184171	0.00730635	0.0260874
PRDX6	-0.971238	0.232318	-0.0269057	0.0145211	-0.0423238
RAB1B	0.950887	-0.110131	-0.23904	0.152354	0.057729
TCP1	0.787322	-0.159995	-0.273955	-0.494367	0.187282
TPI1	0.981368	0.111625	0.126108	-0.0252835	0.0889617
TPM3	-0.832833	0.0779223	0.243331	0.474556	-0.126111
TPM4	0.4945	0.0304254	0.588432	0.534495	-0.350152
UQCRC1	-0.936205	0.11478	-0.178456	-0.261742	-0.0999489
VIM	0.997769	-0.0262835	0.0609067	0.00531885	0.00527771

## Sheet: Square cosines matrix
Gene protein	PC1	PC2	PC3	PC4	PC5
ALCAM	0.876822	0.0658727	0.0123517	0.0120849	0.0328684
ATAD3A	0.260142	0.557049	0.0241748	0.145808	0.012826
CRAT	0.0201633	0.0124926	0.0207687	0.503827	0.442748
DECR1	0.263078	0.000420642	0.365872	0.208597	0.162034
DNAH8	0.898771	0.00385272	0.0870179	0.00754684	0.00281162
EIF4EBP1	0.460466	0.0929822	0.000216258	0.229146	0.21719
IGF2BP3	0.869177	0.0890284	0.0176968	0.0218596	0.00223817
NDUFAB1	0.876108	0.00529428	5.79754e-06	0.100541	0.0180509
PPIC	0.491118	0.0654859	0.126532	0.144571	0.172292
RPE	0.754813	0.172169	0.00644024	0.0331755	0.0334017
RPS29	0.0177797	0.0867084	0.0741191	0.794917	0.0264757
RRM1	0.599862	0.342054	0.00986621	0.0440114	0.00420641
SF3A1	0.00473842	0.178883	0.0478688	0.31435	0.45416
SNRPN	0.426704	0.000123848	0.0170525	0.374362	0.181757
SNX1	0.114389	0.507744	0.224456	0.149139	0.00427086
SRSF9	0.798834	0.118093	0.00563519	0.00383885	0.0735986
VAMP3	0.968686	0.00021006	0.0116336	0.00868887	0.0107813
ARF5	0.605896	0.32787	0.00332256	0.0566645	0.00624687
DCTN2	0.109405	0.0752639	0.683499	0.0440989	0.0877338
DIAPH1	0.273384	0.654367	0.00931664	0.0629316	1.05388e-06
HACD3	0.797413	0.00770281	0.0832663	0.00921683	0.102401
HADH	0.941686	0.0375528	0.0162533	0.00415046	0.00035745
HDGFRP2	0.822463	0.164785	0.00233595	0.0100073	0.000408188
LIMS1	0.848008	0.118272	0.0241569	0.000218862	0.00934472
PSMD14	0.102816	0.10854	0.56942	0.120045	0.0991791
RPL29	0.399008	0.287328	0.25638	0.0467804	0.0105037
SQSTM1	0.0971695	0.00312144	0.890154	0.00724846	0.0023069
UBE2D2	0.445324	0.258448	3.37144e-06	0.290464	0.00576084
DYNC1LI2	0.587821	0.143148	0.134028	0.0699919	0.0650113
AKR1A1	0.947726	3.77491e-08	0.0331325	0.0186683	0.000472971
AKR1C2	0.995147	0.000237542	0.00425881	1.95698e-07	0.000356106
ANXA11	0.233463	0.584665	0.0114146	0.0395214	0.130936
API5	0.431224	0.391762	0.0487858	0.0881832	0.0400453
ATP5O	0.0262402	0.217052	0.215002	0.211397	0.330308
ATP6V1A	0.808233	0.0189443	0.00489702	0.105485	0.0624409
ATP6V1B2	0.838604	0.0170363	0.045456	0.0650082	0.0338954
ATP6V1G1	0.279212	0.0189647	0.2965	0.375422	0.0299016
BOLA2	0.684169	0.163439	0.0891367	0.00351708	0.0597381
CARS	0.102089	0.00225583	0.213955	0.645787	0.0359135
CAT	0.794286	0.00357503	0.157117	0.0021444	0.0428781
CSNK2A1	0.828593	0.0113528	0.00525885	0.0195221	0.135273
CTNNA1	0.866528	0.00840699	0.000100683	0.110292	0.0146723
DNPEP	0.864347	0.0225757	0.049107	0.0135916	0.0503786
DPP3	0.868868	0.00888489	0.0263115	0.000214443	0.0957213
EIF3H	0.76624	0.00120288	0.0176886	0.00854838	0.20632
ELAVL1	0.995032	0.000420974	0.00171017	0.00277959	5.75205e-05
EPHX1	0.99516	0.000335517	0.00392345	0.000516029	6.46784e-05
ETFB	0.974067	2.11986e-05	0.00547174	0.00227814	0.018162
FARSB	0.109759	0.126207	0.0164389	0.145689	0.601906
FBL	0.77317	0.00087882	0.221801	0.000628645	0.00352185
FEN1	0.180614	0.126881	0.351869	0.330742	0.00989385
FTL	0.987828	0.000178513	0.00261705	0.000973272	0.00840288
GLO1	0.924521	0.00193161	0.0068179	0.0648843	0.00184516
GOT1	0.272809	0.0643357	0.0060362	0.0122555	0.644564
GRHPR	0.690349	0.0591743	0.00859553	0.23117	0.0107119
GSR	0.779475	0.00400197	0.00771441	0.0251945	0.183614
GTF2I	0.583876	0.000102532	0.00171306	0.00834197	0.405966
HSD17B4	0.720512	0.00523469	0.0137985	0.0795067	0.180948
LEPRE1	0.834242	0.00769217	0.0122673	0.142127	0.0036718
LRPPRC	0.744631	0.00804002	0.000252331	0.238243	0.0088339
MAPK1	0.924696	0.00245621	0.0141518	0.0561914	0.00250434
MARS	0.994032	0.0011381	0.000729636	0.00409576	4.11513e-06
NSFL1C	0.879619	0.00354702	0.0289932	0.000806781	0.0870343
PCYT1A	0.251148	0.00454727	0.000735512	0.0418938	0.701676
PDHA1	0.622764	0.0550546	0.144046	0.170365	0.00777061
PRDX2	0.974769	0.000226975	0.00182641	0.0207956	0.00238157
PSIP1	0.252822	0.0109576	0.711137	0.0108327	0.0142505
PSMB3	0.933035	0.0041396	0.0110181	0.0306762	0.0211314
PSMD8	0.385972	0.0960719	0.00747464	0.495818	0.0146636
PTGR1	0.987403	0.000644389	0.00456712	0.00581907	0.00156687
PTPN1	0.122002	0.00241804	0.0692945	0.792692	0.0135933
RAE1	0.0851665	0.835493	0.0253939	0.023597	0.0303493
RBBP7	0.609742	0.00492402	0.000617348	2.57406e-06	0.384714
SARS	0.764047	0.00651062	0.00563763	0.107615	0.11619
SCP2	0.81133	0.00402871	0.153764	0.0249209	0.00595694
SF3B3	0.392019	0.0042575	0.0999642	0.0899863	0.413773
SF3B4	0.00953927	0.00229071	0.0829086	0.839662	0.0655994
SLC1A5	0.968339	0.0236748	0.00131434	0.00517619	0.00149533
SLC25A6	0.964525	0.00016685	0.0111681	0.0190543	0.00508601
SLC39A7	0.711535	0.0112079	0.00176416	0.221267	0.0542252
SPARC	0.381357	0.0596922	0.00441351	0.00466411	0.549873
TOMM22	0.843156	0.0403893	0.0574787	0.0178681	0.0411079
TOMM70A	0.020454	0.829883	0.0431574	0.0359387	0.0705665
TTN	0.920835	0.00787245	0.00216636	0.0257475	0.0433791
UBAP2L	0.325967	0.0222168	3.41795e-05	0.549917	0.101866
ATP5H	0.0618683	0.00564901	0.00111097	0.46071	0.470661
SDHA	0.271297	0.0288205	0.0404194	0.00140605	0.658057
ADRM1	0.887844	0.00736633	0.0938963	0.00972523	0.00116864
BTF3	0.98263	0.0147118	0.00208118	0.000328325	0.000249076
CIRBP	0.955727	0.0134896	0.0109046	5.59812e-05	0.0198226
CPOX	0.618029	0.174886	0.160558	0.0310485	0.0154789
GFPT1	0.563626	0.031613	0.00391174	0.369394	0.0314553
HNRNPUL1	0.389332	0.162299	0.375138	0.0731202	0.000110119
NUCB2	0.0490269	0.0710394	0.387796	0.0531307	0.439007
PDCD6	0.527969	0.0146518	0.0189233	0.411032	0.0274236
PLOD1	0.863235	0.0992626	0.0247038	0.00309795	0.00970037
PRPF19	0.626749	0.187896	0.135995	0.00457461	0.0447856
PSMB6	0.76892	0.220535	0.00181621	0.00867236	5.61051e-05
RBM3	0.751886	0.0357388	0.192788	0.00607388	0.013513
RPL34	0.046426	0.165442	0.261094	0.321122	0.205916
RPS28	0.00153997	0.119913	0.508423	0.31667	0.0534534
SRP72	0.295459	0.126747	0.467759	0.10254	0.00749437
TM9SF2	0.392522	0.248862	0.133041	0.0713506	0.154224
TMED7.TICAM2	0.731586	0.243151	0.00231887	0.0208382	0.00210526
TSPO	0.861323	0.00473494	0.128122	4.18263e-05	0.00577827
UBE2M	0.150827	0.427562	0.123068	0.0608413	0.237702
AK4	0.845268	0.00257881	0.141286	0.0107883	7.82452e-05
BZW1	0.914982	0.0450546	0.0279881	0.0113266	0.000648423
CYFIP2	0.636248	0.225896	0.126054	0.00548957	0.00631194
EZR	0.876519	0.0193061	0.0999492	0.00111231	0.00311366
FLNC	0.981986	0.0106449	0.00724533	1.4923e-05	0.000108463
MAP2K1	0.867668	0.111165	0.0205947	0.000184933	0.000387614
NCEH1	0.851956	0.0892867	0.0121152	0.00443826	0.0422039
OGDH	0.708593	0.126832	0.158922	0.00500672	0.000646711
OXSR1	0.319491	0.615512	0.030431	0.0244581	0.0101077
PXN	0.998681	0.000616796	0.000359641	1.9197e-05	0.000322899
RPS26	0.289766	0.000907034	0.657825	0.0448805	0.00662161
RTN3	0.854448	0.00025742	0.00613519	0.0559524	0.0832071
TMED9	0.743527	0.0647943	0.0230295	0.165005	0.00364409
TWF2	0.871389	0.105358	0.00534018	0.00921193	0.00870124
AKR1C3	0.982679	0.000682292	0.0043532	0.0100826	0.00220244
ANXA7	0.729347	0.00439373	0.03954	0.102377	0.124343
ATP1B3	0.556973	0.011481	0.153569	0.0865901	0.191387
CAD	0.612611	0.209169	0.0876336	0.00532312	0.0852629
CNBP	0.02123	0.00443805	0.594884	0.345069	0.0343787
COLGALT1	0.328013	0.277614	0.00134693	0.0833365	0.30969
COX4I1	0.736452	0.0707867	0.066212	0.126345	0.000204198
CYC1	0.704384	0.0172742	0.0246844	0.059471	0.194186
DDX1	0.175714	0.0924009	0.00464735	0.254572	0.472666
EWSR1	0.754972	0.060385	0.107952	0.016083	0.0606078
GMPS	0.850009	0.00391277	0.00992613	0.132425	0.0037272
GORASP2	0.0627611	0.705029	0.00238263	0.153706	0.0761206
HEBP1	0.410671	0.0880738	0.046521	0.291777	0.162957
LARS	0.665254	0.0760652	0.0785592	0.0135393	0.166582
LRRFIP1	0.361928	0.249126	0.00273922	0.383732	0.00247405
MAT2A	0.899823	0.00317729	0.0229544	0.0663028	0.00774206
NANS	0.0719959	0.0331788	0.681866	0.00468239	0.208277
NASP	0.276137	0.0622908	0.0102618	0.291944	0.359367
NOMO1	0.0543607	0.134717	0.562791	0.203056	0.0450757
NUDT21	0.0235065	0.649351	0.0420921	0.281996	0.00305431
PAFAH1B1	0.101621	0.0510051	0.00492889	0.0616208	0.780824
PAFAH1B3	0.811579	0.0166982	0.00340405	0.00124273	0.167076
PARP1	0.41766	0.250534	0.295281	0.0347306	0.00179402
PDHB	0.162541	0.159388	0.239333	0.376589	0.0621497
PGRMC2	0.00235656	0.253086	0.231455	0.423587	0.0895166
PON2	0.820625	3.52676e-05	0.00175737	0.175389	0.00219293
PPP2R2A	0.10853	0.107235	0.505244	0.118008	0.160983
PRPF8	0.000188389	0.0358288	0.0337673	0.929635	0.000580137
PSAP	0.0213641	0.789941	0.0762057	0.0758724	0.0366166
PSMA3	0.280725	0.0149433	0.00032149	0.680279	0.0237312
RANBP1	0.860807	0.00175172	2.00039e-05	0.00707796	0.130344
RBM14	0.451522	0.348785	0.0010486	0.158539	0.0401062
RPL21	0.434286	0.247328	0.26796	0.0124407	0.0379852
RPL28	0.682833	0.0416979	0.0151471	0.260316	6.44241e-06
RPS27	0.979085	0.00209684	0.00018911	0.0117388	0.00689067
RTCB	0.0286651	0.0433373	0.142605	0.195328	0.590065
SAR1B	0.851662	0.037097	0.020284	0.0701131	0.0208439
SF3B1	0.700987	0.0200525	7.14466e-05	0.263329	0.0155602
SH3BGRL	0.00768383	0.113892	0.000601645	0.271403	0.606419
SH3GL1	0.00643248	0.458852	0.186671	0.334302	0.0137424
SLC25A11	0.000737598	0.283773	0.00797665	0.353291	0.354221
SNRPA	0.0654317	0.0142326	0.045869	0.369277	0.50519
SNRPF	0.434793	0.522585	0.00614328	0.00615545	0.0303229
SRI	0.953281	0.00083496	0.000770596	0.0401499	0.00496334
STT3A	0.727623	0.0348853	0.0322236	0.0421001	0.163168
TARDBP	0.00261596	0.511629	0.038721	0.444321	0.00271305
TCEB1	0.689681	0.0686171	0.20925	0.0164809	0.015971
UBE2N	0.948337	0.0108676	0.00197874	0.0256345	0.0131819
UGGT1	0.15509	0.0595542	0.633355	0.0322462	0.119755
VASP	0.401044	0.375044	0.00124023	0.222017	0.000653628
VPS35	0.399392	0.00355097	2.07878e-05	0.453328	0.143708
YARS	0.843733	0.00615535	0.000113249	0.0799653	0.0700329
YWHAH	8.14597e-05	0.0805099	0.384115	0.346155	0.189138
ACO2	0.995004	0.00261596	0.00170718	0.000419892	0.000253085
GPD2	0.000277162	0.0112464	0.214906	0.138801	0.634769
OAT	0.365108	0.0711915	0.18242	0.267675	0.113606
UQCRC2	0.728778	0.135669	0.108004	0.0264925	0.00105667
BAG3	0.205915	0.0124441	0.524625	0.0326793	0.224337
CRYZ	0.997046	0.000665225	0.000956478	0.00132515	6.80286e-06
EHD1	0.972245	0.0260641	0.000140926	0.00138588	0.000164067
EIF3E	0.0319592	0.77201	0.0348348	0.122919	0.0382765
ESYT1	0.737993	0.155838	0.0346818	0.0230601	0.0484269
GGH	0.941873	0.0168346	0.0406937	0.000412785	0.000186089
HEXB	0.23092	0.48286	0.198181	0.0806131	0.00742544
ILK	0.8688	0.00686485	0.000762088	0.120416	0.00315658
KIN27	0.454183	0.474833	0.00935621	0.0246653	0.0369624
KPNA4	0.325298	0.560234	0.0114181	0.0762543	0.0267965
LMAN1	0.962638	2.08951e-07	0.0284334	0.00866097	0.000266936
NMT1	0.110288	0.310602	0.575547	0.00099484	0.00256847
PAK2	0.553551	0.0765452	0.0123074	0.317158	0.0404379
PDXK	0.595385	0.348279	0.0233704	0.032602	0.00036348
PFDN2	0.645005	0.110935	0.0212038	0.126723	0.0961325
PPP2R4	0.760089	0.0324372	0.203652	0.00221889	0.00160254
RECQL	0.721541	0.0354802	0.227979	0.0137727	0.0012273
RPS23	0.213344	0.00875292	0.0301449	0.651454	0.0963042
SCRN1	0.14781	0.643503	0.137528	0.00462422	0.066535
SRSF2	0.640952	0.00163984	0.332082	0.0153494	0.00997633
STOML2	0.493112	0.396689	0.00359984	0.0595984	0.0470002
TBCB	0.315452	0.105742	0.34507	0.02794	0.205796
TMED10	0.953959	0.038064	0.00657232	0.00108347	0.000321007
TMED2	0.676813	0.107745	0.199233	0.00783379	0.00837512
UBQLN1	0.916186	0.00019324	0.081589	1.60367e-06	0.00203053
YBX3	0.771102	0.0297308	0.159277	0.0310924	0.00879777
AARS	0.948447	0.0140055	0.0372618	1.56012e-05	0.000269641
ABCE1	0.155394	0.595348	0.0194893	0.00852978	0.221239
ACADVL	0.240289	0.221622	0.00254286	0.172564	0.362982
ACLY	0.984269	0.0145339	0.000261227	0.000925904	1.01273e-05
ACOT7	0.841524	0.000343788	0.00377845	0.0396605	0.114693
ACTC1	0.0162452	0.0018072	0.72955	0.226194	0.0262036
ACTG1	0.218402	0.118061	0.351258	0.256436	0.0558426
ACTN1	0.978725	0.00609544	0.000638923	0.0114012	0.00313991
ACTN4	0.55502	0.363337	0.0611117	0.0014113	0.0191199
ACTR1A	0.468452	0.00565409	0.2342	0.277053	0.0146407
ACTR2	0.608916	0.363999	0.0267853	4.8628e-05	0.000250966
ACTR3	0.400809	0.00162359	0.173151	0.198691	0.225726
ADH5	0.960091	0.0234009	0.013185	0.00313405	0.000189468
ADK	0.532784	0.157265	0.16411	0.0987631	0.0470793
AHCY	0.969066	0.00486345	0.000178029	0.0202652	0.00562718
AHNAK	0.854808	0.0600336	0.00248114	0.003146	0.0795312
AHSA1	0.652826	0.293964	0.0377696	0.0146014	0.00083875
AK1	0.00345375	0.0826899	0.680579	0.0137358	0.219541
AK2	0.0163621	0.123139	0.530949	0.290313	0.0392364
AKR1C1	0.997955	8.23734e-06	0.000142363	0.00164198	0.000252712
ALDH1A3	0.996315	0.00314562	0.000131041	0.000371303	3.72785e-05
ALDOA	0.485059	0.0223388	0.428504	0.0153792	0.048719
ALDOC	0.731119	0.0600565	0.0420743	0.166105	0.000645298
ALYREF	0.272221	0.102792	0.108355	0.0827509	0.433881
ANXA1	0.98125	0.00900425	0.00947669	0.000255656	1.34971e-05
ANXA2	0.0945389	0.313296	0.422874	0.0166823	0.152609
ANXA5	0.755957	0.219782	0.00029119	0.00571318	0.0182562
ANXA6	0.993691	0.00227058	0.00083552	0.00220287	0.000999592
AP2A1	0.0689899	0.626476	0.131357	0.0142155	0.158962
AP2B1	0.457186	0.176043	0.10999	0.196351	0.0604297
AP2M1	0.156253	0.0953718	0.136009	0.247048	0.365319
APEX1	0.233558	0.0206774	0.165147	0.400754	0.179864
APMAP	0.983305	0.00020755	0.000517218	0.0156961	0.00027394
APRT	0.708247	0.000445572	0.228478	0.0616505	0.0011794
ARCN1	0.348608	0.418819	0.00411825	0.116881	0.111574
ARF1	0.14323	0.00657157	0.134538	0.0218822	0.693778
ARF4	0.627131	0.189344	0.00800781	0.141245	0.0342719
ARHGAP1	0.53529	0.00135496	0.239703	0.170143	0.0535086
ARHGDIA	0.993265	0.00225807	0.000587558	0.00351446	0.000374793
ARPC1A	0.505694	0.162544	0.293176	0.00885365	0.0297319
ARPC2	0.726748	0.0131356	0.197231	0.0599353	0.0029493
ARPC3	0.249391	0.387561	0.016864	0.306645	0.0395395
ARPC4.TTLL3	0.743249	0.228855	0.000154248	0.0248224	0.0029192
ARPC5	0.000101828	0.800109	0.0488831	0.0933139	0.0575921
ASNA1	0.132135	0.000741329	0.265728	0.382961	0.218435
ASPH	0.966032	0.015096	0.0126677	0.00618857	1.55734e-05
ATIC	0.447495	0.0470634	0.154394	0.0616124	0.289436
ATL3	0.852582	0.121087	0.000927826	0.000542813	0.0248604
ATP1A1	0.0197877	0.148033	0.00136477	0.626972	0.203842
ATP2A2	0.946186	0.0367445	0.00563699	0.0107366	0.000695451
ATP5A1	0.832819	0.14245	7.67757e-05	0.0180608	0.00659367
BANF1	0.36638	0.0868347	0.046229	0.436319	0.0642371
BASP1	0.169466	0.343399	0.443573	0.0371837	0.00637766
BCAP31	0.131521	0.00450435	0.00214843	0.542147	0.319679
BLVRA	0.00172416	0.0333804	0.663757	0.115565	0.185573
BLVRB	0.92649	0.00148093	0.0289825	0.0402415	0.00280482
BSG	0.937135	0.000101176	0.0286334	0.0317387	0.00239125
BUB3	0.000260869	0.050574	0.0677242	0.401663	0.479778
C1QBP	0.273864	0.289897	0.239675	0.179976	0.016587
CACYBP	0.43252	0.256954	0.00476565	0.00060547	0.305154
CALD1	0.923716	0.0196442	0.0388559	0.00859752	0.00918586
CALM2	0.758513	0.0403099	0.178915	0.0039194	0.0183425
CALR	0.990985	0.00247525	0.0046477	0.000308418	0.00158334
CAND1	0.0784314	0.476817	0.0294721	0.256841	0.158438
CANX	0.950851	0.0201718	0.0197809	0.00215251	0.00704352
CAP1	0.975957	0.00971029	0.000651244	0.00348433	0.0101974
CAPN1	0.627949	0.0481009	0.0273636	0.285166	0.0114201
CAPN2	0.991736	0.000830898	1.50876e-05	0.000417909	0.00700019
CAPNS1	0.968705	0.00726416	0.020246	0.00026577	0.00351917
CAPRIN1	0.00711407	0.495681	0.304505	0.0918109	0.100889
CAPZA1	0.140044	0.559358	0.000373711	0.27734	0.0228839
CAPZA2	0.736916	0.146083	0.0409308	0.0747123	0.00135699
CAPZB	0.354216	0.0779676	0.0424979	0.302604	0.222714
CARHSP1	0.65687	0.00109668	0.0992561	0.01353	0.229247
CAST	0.189594	0.216238	0.30345	0.230096	0.0606217
CAV1	0.781282	0.0113973	0.178025	1.61111e-06	0.0292938
CBR1	0.801876	0.0781472	0.0950325	9.33924e-07	0.0249437
CBX3	0.820597	0.0979327	0.0018119	0.00846496	0.0711934
CCT3	0.223572	0.00970985	0.555356	0.0060036	0.205358
CCT4	0.980486	0.0126699	0.00420065	0.000165351	0.0024776
CCT5	0.648724	0.0406973	0.0754068	0.225493	0.00967938
CCT6A	0.728541	0.0481333	0.00874514	0.0370157	0.177565
CCT7	0.935103	0.0464009	0.00123008	0.00226976	0.0149962
CD44	0.843341	0.146295	0.00113354	3.70065e-05	0.00919384
CDC37	0.924024	0.0347909	0.022557	0.018532	9.5702e-05
CDC42	0.0504664	0.749657	0.128057	0.0503648	0.0214549
CFL1	0.16317	0.106922	0.482269	0.246374	0.00126445
CLIC1	0.918596	0.0563711	0.00153782	0.0129856	0.0105098
CLIC4	0.0737482	2.61981e-05	0.590517	0.162904	0.172805
CLTA	0.24625	0.551056	0.0287882	0.0228309	0.151075
CLTC	0.873393	0.00714744	0.117582	0.000181067	0.00169662
CMPK1	0.920681	0.0131347	0.0397177	0.0244645	0.00200229
CNPY2	0.694098	0.000445454	0.00371864	0.00338373	0.298354
COL6A3	0.981337	0.00102398	0.00184325	0.00126131	0.0145341
COMT	0.364556	0.511627	0.000232437	0.117095	0.00648874
COPA	0.705941	0.055074	0.00255845	0.113725	0.122702
COPB1	0.37813	0.0718618	0.0612799	0.475298	0.013431
COPB2	0.380328	0.247404	0.24697	0.0643918	0.0609059
COPE	7.94279e-05	0.0797785	0.028994	0.884617	0.00653099
COPG1	0.0683478	0.0181679	0.045737	0.690865	0.176882
CORO1B	0.0671538	0.268322	0.111777	0.537635	0.015112
CORO1C	0.942739	0.0417169	0.00538299	0.000270978	0.00989058
COTL1	0.865022	0.0176634	0.0416202	0.0657847	0.00990993
CPNE1	0.933113	0.00153515	0.000471893	0.0583822	0.0064978
CPNE3	0.755024	0.146522	0.0552487	0.00739942	0.0358061
CS	0.186677	0.798755	0.0119818	0.0025346	5.12448e-05
CSE1L	0.203005	0.0781079	0.27328	0.423854	0.0217528
CSRP1	0.787697	0.0558775	0.0375178	0.0763502	0.0425578
CTPS1	0.0126825	0.00511804	0.815688	0.122947	0.0435643
CTSA	0.849415	0.13248	0.0138507	0.00407267	0.00018126
CTSB	0.640255	0.00452245	0.00699864	0.235106	0.113118
CTSD	0.977966	0.00032086	0.00705557	0.00138761	0.0132701
CTTN	0.595366	0.373323	0.0129117	0.00341738	0.0149821
CYB5R3	0.000153458	0.128368	0.157339	0.103253	0.610887
CYCS	0.488926	0.464085	0.00346652	0.0377572	0.00576537
DARS	0.981089	0.00640135	0.00610356	0.00444573	0.0019607
DAZAP1	0.0544603	0.00652864	0.625057	0.264882	0.0490725
DBN1	0.739835	5.29267e-05	0.0538163	0.00617673	0.200119
DBNL	0.743522	0.101368	0.127191	0.0213228	0.00659591
DDB1	0.766862	0.176141	0.0479778	3.27332e-06	0.00901578
DDOST	0.513711	0.170943	0.17265	0.0225495	0.120146
DDT	0.883692	0.00134975	0.0728476	0.000177499	0.0419328
DDX17	0.927088	0.0164096	0.0238908	0.0225835	0.0100281
DDX39B	0.898068	0.000124353	0.0408989	0.00165905	0.0592495
DDX3X	0.394103	0.530932	0.000151462	0.0613576	0.0134565
DDX5	0.316429	0.210994	0.00708172	0.316554	0.148941
DHX15	0.136466	0.144839	0.463835	0.237635	0.0172243
DHX9	0.00536247	0.329992	0.0289005	0.0676636	0.568082
DLD	0.660756	0.139862	0.000205065	0.0792686	0.119908
DNAJA1	0.267596	0.402529	0.149746	0.176215	0.00391324
DNM2	0.289286	0.0601746	0.558368	0.00264363	0.0895279
DPYSL2	0.615477	0.318682	0.0650065	0.00082673	6.9334e-06
DPYSL3	0.994228	0.000131351	0.00232559	0.00212288	0.00119228
DSTN	0.996687	0.000252914	0.000706561	0.00144006	0.000913643
DUT	0.00487098	0.241664	0.660235	0.0492534	0.0439771
DYNC1H1	0.885654	0.096124	0.00836148	0.00105575	0.00880425
DYNC1I2	0.843102	0.0799959	0.000211204	0.0168605	0.05983
ECHS1	0.0124896	0.710349	0.0886561	0.0122105	0.176295
EEF1A1	0.827692	0.091455	0.0257942	0.0540371	0.00102171
EEF1B2	0.964176	0.000562483	0.0329839	0.00227768	1.0498e-07
EEF1D	0.0326376	0.158047	0.648075	0.128254	0.0329867
EFHD2	0.94079	0.0116718	0.0472804	0.000234126	2.36794e-05
EHD2	0.829794	0.0596341	0.00549403	0.0363862	0.0686919
EIF2S1	0.925754	0.0288092	0.0375364	0.00767182	0.000228447
EIF2S2	0.140647	0.282386	0.410455	0.0635888	0.102924
EIF2S3	0.25063	0.225757	0.00107364	0.00818461	0.514354
EIF3A	0.436553	0.147217	0.216256	0.00453746	0.195437
EIF3B	0.140993	0.265358	0.116269	0.00152729	0.475853
EIF3F	0.807691	0.0593974	0.0881771	0.000287638	0.0444465
EIF3G	0.168143	0.157913	0.00855497	0.533042	0.132346
EIF3I	0.6425	0.0048328	0.316054	0.0159889	0.0206243
EIF3L	0.326145	0.216862	0.439508	0.00189727	0.0155876
EIF3M	0.080406	0.0112015	0.785608	0.00359655	0.119188
EIF4A1	0.696831	0.101811	0.0800786	4.08056e-07	0.12128
EIF4A2	0.916977	0.00649776	0.0683384	0.000541983	0.00764472
EIF4A3	0.0124869	0.144621	0.800949	0.00244688	0.0394966
EIF4B	0.235805	0.00031847	0.0277731	0.697839	0.0382643
EIF4G1	0.465686	0.52327	0.000628356	0.00456271	0.00585327
EIF4H	0.825402	0.0191778	0.0320152	0.00885931	0.114546
EIF5A	0.870515	0.0962884	0.00237915	0.000928403	0.0298885
EIF6	0.164629	0.0110294	2.71675e-05	0.802916	0.0213982
EMD	0.77198	0.00816946	0.0893126	0.129416	0.00112178
ENO2	0.946632	0.0209808	0.0313362	0.0006616	0.000388953
EPRS	0.875612	0.0121418	0.0680556	0.0255165	0.0186737
ERH	0.61682	0.0797226	0.0315269	0.151236	0.120695
ERO1L	0.982859	0.0120169	0.00330585	0.00162994	0.000188696
ERP29	0.834856	0.0539879	0.00521451	0.0651796	0.0407616
ERP44	0.0539743	0.0457353	0.746012	0.112722	0.0415566
ESD	0.76487	0.191339	0.000704367	0.000330111	0.0427568
ETF1	0.0951338	0.00067244	0.00765786	0.360696	0.53584
ETFA	0.800401	0.00585854	0.16288	0.00962813	0.0212322
FAF2	0.0253491	0.843461	0.00965395	0.00337411	0.118162
FAM129B	0.932979	0.0597568	0.00173977	0.00420628	0.00131775
FARSA	0.300101	0.161269	0.00150198	0.533719	0.0034086
FASN	0.968548	0.00306461	0.00893542	0.0187265	0.000725161
FH	0.614667	0.123162	0.115108	0.0340781	0.112985
FKBP10	0.953144	0.027792	0.00995707	0.000169578	0.00893754
FKBP1A	0.972225	0.0172114	0.00230205	0.00628251	0.00197916
FKBP3	0.583006	0.247397	0.0239162	0.0441749	0.101506
FKBP4	0.583933	0.245025	0.0024229	0.143055	0.0255646
FLNA	0.99633	0.000893887	0.0011272	0.000242735	0.00140626
FLNB	0.614752	0.146079	0.0549912	0.0286745	0.155503
FSCN1	0.98307	0.00957118	0.00549865	0.00176809	9.16111e-05
FTH1	0.428905	0.0503272	0.43062	0.0275764	0.0625708
FUBP1	0.95229	0.00192926	0.0253532	0.013637	0.00679067
FUS	0.3432	0.0289086	0.0200907	0.382583	0.225217
FXR1	0.0577273	0.528247	2.22213e-05	0.0012507	0.412752
G3BP1	0.782571	0.0183401	0.0241042	0.0117732	0.163211
G6PD	0.997848	0.000318432	0.000138382	0.000171325	0.00152431
GAPDH	0.939039	0.0372044	0.0227706	0.000485862	0.00049975
GARS	0.84391	0.0299568	0.0149489	0.0699268	0.0412575
GART	0.209806	0.452641	0.26999	0.00118704	0.0663749
GBE1	0.82327	0.00187903	0.171033	0.00255609	0.00126119
GDI1	0.895178	0.0729669	0.0085407	0.0163579	0.00695679
GDI2	0.741038	0.00273133	0.0114842	0.111219	0.133527
GFPT2	0.756518	0.0417445	0.198659	0.00246927	0.000610092
GLRX3	0.133739	0.539142	0.312114	0.00179543	0.0132095
GNAI2	0.7664	0.0933471	0.0374462	0.00519061	0.0976162
GNB2	0.107628	0.0139446	0.319124	0.500297	0.059006
GNB2L1	0.0107499	0.000143827	0.0572333	0.0311764	0.900696
GOT2	0.930165	0.000187096	1.96257e-05	0.0497376	0.0198905
GPI	0.996756	3.81022e-05	0.000267747	0.00098986	0.00194816
GSN	0.976761	0.0214245	0.000718787	0.000229903	0.000866095
GSPT1	0.586368	0.287569	0.0344391	0.0704844	0.0211399
GSTO1	0.967766	0.015976	0.0160535	5.02638e-05	0.000153846
GSTP1	0.97311	0.000327294	0.00898586	0.00210388	0.015473
H2AFV	0.958341	0.00193557	8.21954e-05	0.0237962	0.0158451
H2AFY	0.942638	0.0122479	0.0183851	0.025791	0.000938481
HADHA	0.00672901	0.76813	0.102893	0.122241	6.35073e-06
HADHB	0.00173256	0.440844	0.0760807	0.350275	0.131068
HARS	0.0176486	0.813891	0.0753404	0.0687072	0.0244132
HDGF	0.562019	0.0442916	0.112333	0.103135	0.178221
HDLBP	0.385901	0.033372	0.0473618	0.209754	0.323611
HINT1	0.216853	0.410256	0.00191624	0.2067	0.164274
HIST1H1B	0.918528	0.00143827	0.000717741	0.024943	0.054373
HIST1H1C	0.941701	0.002906	0.00151386	0.0515184	0.0023603
HIST1H2AJ	0.632552	0.0242863	0.0271934	0.108775	0.207194
HIST1H2BN	0.962466	0.0176	0.00397157	0.015942	2.09413e-05
HIST1H3A	0.975709	0.0010899	0.00175157	0.00853148	0.0129179
HIST1H4A	0.997733	0.00126528	0.000204963	0.000252587	0.000544275
HIST2H2BE	0.875194	0.00298443	0.0558521	0.0161112	0.0498579
HIST2H3PS2	0.489853	0.00658776	0.344658	0.127658	0.0312431
HK1	0.987857	0.00806351	9.82747e-06	0.00403918	3.04037e-05
HLA.B	0.311753	0.630331	0.0139806	0.00125242	0.042683
HM13	0.440293	1.2311e-05	0.0408961	0.473338	0.0454611
HMGB1	0.963174	0.00444523	0.0271689	0.00513683	7.49414e-05
HN1	0.887197	0.10248	3.59504e-06	0.000721443	0.00959786
HNRNPA0	0.702765	0.0832902	0.13801	0.0255507	0.0503837
HNRNPA1	0.705449	0.000555199	0.168432	0.121465	0.00409847
HNRNPA2B1	0.869898	0.0181542	0.0452462	0.0666274	7.44206e-05
HNRNPA3	0.976543	0.000881719	0.00466644	0.017889	2.01199e-05
HNRNPAB	0.922003	0.00309268	2.6183e-05	0.0163709	0.0585072
HNRNPC	0.968456	0.00920822	0.0193595	0.00131489	0.00166147
HNRNPD	0.602879	0.195948	0.194218	0.000124441	0.00683003
HNRNPDL	0.106967	0.384886	0.0740407	0.200157	0.23395
HNRNPF	0.0551147	0.000360555	0.700628	0.149198	0.0946989
HNRNPH1	0.962284	4.28456e-05	0.00226459	0.02986	0.00554893
HNRNPH3	0.755674	0.0988415	0.0872204	0.0509729	0.00729153
HNRNPK	0.894894	0.000924194	0.0317541	0.0191742	0.0532532
HNRNPL	0.900155	0.0178009	4.70659e-05	0.0494582	0.0325386
HNRNPM	0.977952	0.00290656	0.0133472	0.0055978	0.000196634
HNRNPR	0.495786	0.178248	0.0765507	0.00830337	0.241111
HNRNPU	0.998395	0.000140408	0.00116243	2.30472e-06	0.000299854
HNRNPUL2	0.108414	0.00470635	0.6341	0.15143	0.10135
HPCAL1	0.64853	0.183318	0.00105077	0.0421132	0.124987
HPRT1	0.475535	0.0622482	0.017957	0.423324	0.0209363
HSP90AA1	0.998516	0.000686454	1.62538e-05	4.12868e-06	0.000777426
HSP90AB1	0.985196	0.00020923	0.00423544	0.004963	0.00539648
HSP90B1	0.991186	0.00696932	0.000781313	0.000535392	0.000528243
HSPA4	0.66468	0.138314	0.117632	0.0584769	0.0208972
HSPE1	0.282984	0.225745	0.109151	0.159823	0.222297
HSPH1	0.860066	0.00234183	0.0979546	0.0288394	0.0107977
HYOU1	0.956798	0.0026005	0.00433986	0.0346451	0.0016161
IARS	0.577071	0.00281112	0.324987	0.0948478	0.000283653
IDH1	0.90393	0.0099073	0.00105323	0.074807	0.0103027
IDH2	0.984653	0.000522606	8.09639e-06	0.014628	0.000188389
ILF2	0.834554	0.13171	0.0191435	0.0046291	0.00996387
ILF3	0.961813	0.0122185	0.0189311	0.00602547	0.00101202
IMPDH2	0.962272	0.00297761	0.0216302	0.000741237	0.0123785
IPO5	0.924876	0.04536	0.0124652	0.0163559	0.00094278
IQGAP1	0.96611	0.0258989	0.00423191	6.53014e-06	0.00375253
ITGA2	0.911529	0.0292577	0.00236899	0.0091254	0.0477185
ITGB1	0.991353	0.00396041	0.000468617	0.000580476	0.00363708
KARS	0.462065	0.0248985	0.0251862	0.141014	0.346837
KHDRBS1	0.179569	0.665327	0.00153484	0.119614	0.0339555
KHSRP	0.645735	0.21337	0.00559045	0.00142354	0.133882
KIF5B	0.990751	0.00145735	0.00476954	0.000118053	0.002904
KPNB1	0.217964	0.500752	0.0877454	0.0305361	0.163003
KRT10	0.472751	0.145775	0.340828	0.00192254	0.0387231
KRT14	0.182309	0.169192	0.539488	0.0362741	0.0727363
KRT2	0.343439	0.271947	0.297006	0.0196138	0.067994
KRT9	0.24067	0.324215	0.405293	0.000337215	0.0294845
KTN1	0.880553	0.0139493	0.0759622	0.0256832	0.00385259
KYNU	0.836314	0.115706	0.0255146	0.01733	0.00513469
LAP3	0.952794	0.0022279	0.00154744	0.0268375	0.0165928
LASP1	0.0225029	0.238785	0.589658	0.0411069	0.107948
LDHA	0.904008	0.00441018	0.0454823	0.0411695	0.00493024
LDHB	0.962283	0.0196073	0.000106178	0.00376698	0.0142368
LGALS1	0.928498	0.00327253	0.0660395	0.0012837	0.000905817
LGALS3	0.549316	0.367945	0.0569377	0.00760856	0.018193
LMNA	0.594631	0.00835168	0.365674	0.0266045	0.0047384
LMNB1	0.961064	0.0072506	0.00297047	0.0250158	0.00369885
LMNB2	0.427657	0.021695	0.0105218	0.00832742	0.531798
LONP1	0.269884	0.645463	0.00204825	0.0681509	0.014454
LRRC59	0.620291	0.0394356	0.206708	0.125347	0.00821923
LUC7L2	0.285243	0.25682	0.192164	0.00476219	0.261011
MAGOH	0.000235902	0.852327	0.0389169	0.0447531	0.063767
MAP1B	0.970844	0.00450933	0.0183933	0.00610281	0.000150248
MAP4	0.792177	0.00493275	0.193544	0.00934067	6.50134e-06
MAPRE1	0.350983	0.458598	0.068903	0.0555982	0.0659179
MARCKS	0.780688	0.0689701	0.121457	0.00507253	0.0238127
MATR3	0.707867	0.124369	0.0163269	0.14608	0.0053565
MCFD2	0.707589	0.00171993	0.176073	0.0128002	0.101818
MCM3	0.210442	0.204532	0.517572	0.0560255	0.0114286
MDH1	0.0131305	0.520425	0.399455	0.0119401	0.055049
MDH2	0.463361	0.351768	0.108515	0.00376566	0.0725895
MIF	0.32672	0.212693	0.0316522	0.420138	0.00879663
MTCH2	0.0214406	0.668172	0.231341	0.00565687	0.0733903
MTHFD1	0.937052	0.0487055	0.000374889	0.0119647	0.00190257
MYDGF	0.483389	0.280555	0.0661164	0.121209	0.0487307
MYH9	0.626096	0.0466423	0.297656	0.00413696	0.0254688
MYL12B	0.822614	0.0348858	0.00790505	0.00129607	0.133299
MYL6	0.0627932	0.00540269	0.790815	0.0762758	0.0647131
MYO1C	0.851044	0.0185518	0.0264013	0.0441795	0.0598233
MYOF	0.528751	0.275841	0.00118814	0.109928	0.0842914
NACA	0.660873	0.177683	0.111483	0.000460864	0.0495007
NAMPT	0.980606	0.0151423	0.0012322	0.00233985	0.000679569
NAPA	0.66646	5.26481e-05	0.0863127	0.214254	0.0329206
NCL	0.989219	0.000362811	0.00481757	0.00320853	0.00239219
NDRG1	0.547652	0.435139	0.011507	0.00119558	0.00450566
NME1.NME2	0.0015066	0.216453	0.590825	0.173564	0.0176506
NONO	0.884713	2.05516e-07	0.0189297	0.020741	0.0756163
NPEPPS	0.0565035	0.0599112	0.406805	0.425973	0.0508078
NPM1	0.362273	0.336319	0.0515586	0.228355	0.021494
NQO1	0.997573	0.000142587	0.00107156	0.00121024	2.81643e-06
NUDC	0.973603	0.00817358	0.00060862	0.000452141	0.0171626
OLA1	0.950817	0.0122802	0.0121958	0.000111872	0.0245953
OTUB1	0.847006	0.0936783	0.0437507	0.0148982	0.000667076
P4HA1	0.916407	0.00741447	0.0618987	0.0130213	0.00125823
P4HA2	0.992947	0.00380359	0.00306773	0.000149574	3.24727e-05
P4HB	0.981382	0.00497983	0.0126595	0.000831612	0.000147419
PA2G4	0.91704	0.011353	0.00941258	0.016093	0.0461018
PABPC1	0.722047	0.00463497	0.269162	0.00367305	0.000483046
PAICS	0.964524	0.000845793	0.00167454	0.0141603	0.0187953
PCBP1	0.116158	0.632717	0.0389419	0.205183	0.00699957
PCBP2	0.529224	0.000875172	0.0513291	0.398666	0.019906
PCMT1	0.611684	0.269118	0.0597806	0.015332	0.0440861
PCNA	0.943151	0.0113465	0.0144507	0.00440282	0.026649
PDIA4	0.968191	0.00154937	0.0264494	0.000219616	0.00359026
PDIA6	0.963194	0.00738198	0.0209919	0.00231952	0.0061123
PEA15	0.54962	0.381817	0.0351741	0.00569306	0.027696
PEBP1	0.920902	0.00573257	0.0545492	0.00587299	0.0129435
PFKL	0.949488	0.000230049	0.00302559	0.00651645	0.0407395
PFKP	0.962247	0.0128735	0.0239849	0.00062961	0.000265246
PFN1	0.676822	0.109649	0.0766469	0.00292852	0.133953
PFN2	0.962169	0.0222141	0.00794547	0.00223013	0.00544157
PGD	0.997884	0.000204409	0.000846214	0.000696899	0.000368957
PGK1	0.972098	0.0179658	0.00589148	0.00151488	0.00253014
PGLS	0.106204	0.275886	0.382275	0.228346	0.00729022
PGM1	0.453172	0.00190028	0.540733	0.0030958	0.00109862
PGRMC1	0.83413	0.132456	0.00130232	0.0319493	0.00016258
PHB2	0.407972	0.0331577	0.0221249	0.189492	0.347254
PIN4	0.298662	0.24206	0.118406	0.254974	0.0858979
PKM	0.965133	0.0254379	0.000512258	0.00752264	0.00139368
PLEC	0.938927	0.0212982	0.0144495	0.00675433	0.0185709
PLIN3	0.995182	0.0011428	0.00294449	0.000132806	0.000598054
PLOD2	0.407761	0.233951	0.121076	0.0933182	0.143894
PLS3	0.893842	9.21929e-05	0.10477	0.0011779	0.000117999
POFUT1	0.733534	0.0897942	0.0533746	0.077892	0.0454051
PPA1	0.913381	0.0164725	0.000770279	0.0250979	0.0442783
PPIA	0.962958	0.000195262	0.00566363	0.0194148	0.0117685
PPIB	0.36179	0.00610686	0.594682	0.00244669	0.0349743
PPP1CB	0.602509	0.197881	0.0135026	0.0862796	0.0998273
PPP2R1A	0.674305	0.18835	0.0639102	0.0586297	0.0148055
PRDX3	0.440761	0.417217	0.0614923	0.059372	0.0211568
PRDX4	0.819717	0.00823565	0.169705	0.000840781	0.00150217
PRDX5	0.0392647	0.544548	0.386671	0.00903691	0.0204799
PRKAR1A	0.252887	0.640797	0.00690141	0.0668142	0.0326
PRKCSH	0.879057	0.0154628	0.0171688	0.0405046	0.0478068
PRKDC	0.911895	0.0345504	0.00788313	0.0269777	0.0186937
PRMT1	0.319074	0.349535	0.155774	0.0584512	0.117166
PSMA1	0.0506417	0.542386	0.0819503	0.0213355	0.303687
PSMA2	0.0955282	0.279218	0.0518015	0.134211	0.439242
PSMA4	0.333392	0.0674458	0.151513	0.305762	0.141888
PSMA5	0.0324693	0.0567275	0.439383	0.400466	0.0709533
PSMA6	0.830724	0.00969468	0.00397104	0.0414093	0.114201
PSMA7	0.149377	0.010219	0.18652	0.332477	0.321406
PSMB1	0.00647573	0.429736	0.00262981	0.261096	0.300063
PSMB2	0.0423562	0.0183912	0.896892	0.038387	0.00397332
PSMB4	0.697604	0.000840363	0.216153	0.0840478	0.00135421
PSMC1	0.822276	0.140662	0.000700387	7.16876e-05	0.0362895
PSMC2	0.94581	0.00122943	0.0528592	5.76467e-06	9.58946e-05
PSMC3	0.0197587	0.30001	0.00146958	0.598266	0.0804961
PSMC4	0.261279	0.126581	0.540775	0.0504672	0.0208977
PSMC5	0.182287	0.216403	0.122073	0.011414	0.467823
PSMC6	0.228243	0.0425986	0.0199036	0.503411	0.205844
PSMD1	0.0977972	0.341095	0.00943746	0.000588417	0.551082
PSMD11	0.839081	0.0543749	0.0718791	0.000663615	0.0340011
PSMD12	0.19691	0.0102015	0.333121	0.269763	0.190004
PSMD13	0.363827	0.0903082	0.154191	0.0105439	0.38113
PSMD2	0.979115	0.0106458	0.00118916	0.00159701	0.00745311
PSMD3	0.504811	0.0833079	0.111436	0.0940015	0.206444
PSMD4	0.00555157	0.647827	0.129839	0.187121	0.0296618
PSMD7	0.301882	0.032744	0.187225	0.037536	0.440614
PSME1	0.00260404	0.818943	0.0977294	0.0269366	0.0537873
PSME2	0.0705675	0.0324893	0.733961	0.121463	0.0415194
PTBP1	0.809514	0.0952384	0.0025484	0.0910901	0.00160955
PTGES3	0.936114	0.0421446	0.00542503	0.000160976	0.0161556
PTRF	0.92557	0.0147803	1.01237e-05	0.0168003	0.0428388
PUF60	0.450858	0.0816078	0.460539	0.00612569	0.00086973
PYGB	0.932049	0.0143333	0.00436282	0.0471699	0.00208473
QARS	0.816574	0.164931	0.00603011	0.00123921	0.0112259
RAB11B	0.488111	0.00411836	0.0199064	0.478463	0.00940109
RAB14	0.135682	0.00134473	0.816756	0.0138464	0.0323707
RAB1A	0.872995	0.0236285	0.0155557	0.0603845	0.0274367
RAB2A	0.0748067	0.066665	0.195995	0.318592	0.343941
RAB5C	0.804425	0.0116774	0.0938139	0.000574154	0.0895095
RAB7A	0.975323	0.00058907	0.0170088	0.00573233	0.00134638
RAC1	0.539714	0.237553	0.22114	0.000340676	0.00125179
RAD23B	0.85386	0.046287	0.0837365	0.00170452	0.0144121
RALY	0.251896	0.0897512	0.000257702	0.225298	0.432797
RAN	0.903434	0.000609681	0.0532356	0.0129325	0.0297886
RAP1B	0.695367	0.0297263	0.210011	0.0631573	0.00173865
RARS	0.0420846	0.0463597	0.000651662	0.347062	0.563842
RBBP4	0.895956	0.000105047	0.0374315	0.0641531	0.00235422
RBM8A	0.195899	0.299965	0.137698	0.00514064	0.361297
RBMX	0.0572895	0.30873	0.00255757	0.0228607	0.608563
RCN1	0.45439	0.0632652	0.433505	0.0487646	7.54338e-05
RHOA	0.958105	0.00708667	0.0321889	0.00188618	0.000733704
RNH1	0.982195	0.00372479	0.000595092	0.0132707	0.000214733
RPL10	0.0391766	0.160881	0.694465	0.0672734	0.0382039
RPL10A	0.915052	0.0204783	0.0642978	2.97933e-05	0.00014244
RPL11	0.510139	0.00945609	0.163795	0.271822	0.044788
RPL12	0.28598	0.107599	0.350402	0.128849	0.12717
RPL13	0.36682	0.425465	0.00124639	0.0426272	0.163842
RPL13A	0.372386	0.0135066	0.513287	0.0801238	0.0206963
RPL14	0.0171772	0.157332	0.773951	0.0102628	0.0412762
RPL15	0.623635	0.158338	0.00379237	0.0379808	0.176254
RPL17	0.0425871	0.0444876	0.607439	0.0515197	0.253966
RPL18	0.369344	0.234149	0.232529	0.00918349	0.154795
RPL18A	0.103675	0.00517184	0.170503	0.0605863	0.660064
RPL19	0.362995	0.281251	0.0557074	0.0278698	0.272177
RPL22	0.00252543	0.941695	0.00981664	0.0266565	0.0193069
RPL23	3.07422e-08	0.0117407	0.0570159	0.930863	0.000379969
RPL23A	0.826034	0.0227383	0.0699626	0.0727353	0.00852947
RPL24	0.0921698	0.478415	0.168808	0.0948088	0.165798
RPL27	0.0852076	0.10662	0.368191	0.102156	0.337824
RPL27A	0.829081	0.00010933	0.166951	0.00058721	0.00327128
RPL3	0.203031	0.749031	0.00562926	0.00404265	0.0382662
RPL30	0.0293635	0.000464559	0.619416	0.0588083	0.291948
RPL31	0.356162	0.170928	0.205763	0.021172	0.245976
RPL32	0.0577378	0.00236671	0.647087	0.00870274	0.284106
RPL36	0.35082	0.540639	0.069698	0.00253816	0.0363052
RPL37A	0.0638788	0.709962	0.198596	0.0188022	0.00876087
RPL38	0.827182	0.0734163	0.0382679	0.0144239	0.0467096
RPL4	0.00734532	0.0724914	0.00180472	0.396696	0.521663
RPL5	0.752632	0.0503909	0.0467009	0.140624	0.00965153
RPL6	0.27993	0.0360899	0.65231	0.000988154	0.030682
RPL7	0.00618834	0.0346484	0.933866	0.00052717	0.0247705
RPL7A	0.00375781	0.369355	0.565887	0.000439777	0.0605604
RPL8	0.248555	3.32526e-05	0.694699	0.00455816	0.0521547
RPL9	0.00225841	0.00326916	0.369491	0.597677	0.0273047
RPLP0	0.814009	0.0514335	0.127154	0.000896067	0.00650741
RPLP1	0.163172	0.572222	0.152864	0.0271592	0.0845822
RPLP2	0.47498	0.00684928	0.292635	0.190526	0.0350103
RPN1	0.0155621	0.0367541	0.553327	0.3195	0.0748564
RPN2	0.484862	0.0772682	0.315572	0.0953689	0.0269287
RPS10	0.086427	0.554535	0.0195677	0.0421659	0.297304
RPS11	0.228162	0.0899976	0.0792434	0.592904	0.00969246
RPS12	0.488551	0.108715	0.0440763	0.342167	0.0164913
RPS13	0.00266085	0.172631	0.203507	0.461036	0.160166
RPS14	0.164564	0.796081	0.0261227	0.00165775	0.0115736
RPS15	0.0131414	0.0834487	0.320785	0.309964	0.27266
RPS15A	0.237618	0.185375	0.227989	0.260934	0.0880839
RPS16	0.230474	0.373435	0.232467	0.120935	0.0426883
RPS17	0.0256219	0.705575	0.242896	0.00613958	0.0197675
RPS18	0.756466	0.0110478	0.19286	0.000214948	0.0394113
RPS19	0.213266	0.543189	0.0239742	0.139445	0.0801262
RPS2	0.020524	0.552837	0.381677	0.0004185	0.0445441
RPS20	0.296948	0.0011752	0.314141	0.289636	0.0981004
RPS21	0.3772	0.0554186	0.14392	0.255059	0.168403
RPS24	0.0260538	0.480519	0.293294	0.00918394	0.190949
RPS25	0.0315909	0.452108	0.0230866	0.0700676	0.423147
RPS27A	0.315564	0.0310838	0.587665	0.0247908	0.0408966
RPS3	0.0843814	0.344836	0.476878	0.0912355	0.00266885
RPS3A	0.00733127	0.000172827	0.838903	0.00251879	0.151074
RPS4X	0.158418	0.174248	0.390423	0.206585	0.0703267
RPS5	0.0742896	0.215047	0.311579	0.335737	0.0633479
RPS6	0.252066	0.022978	0.239249	0.144542	0.341166
RPS7	0.000270839	0.939467	0.0332951	0.000685179	0.0262816
RPS8	0.0378495	0.511825	0.345947	0.00713341	0.0972449
RPS9	0.400929	0.202227	0.299096	0.02552	0.0722276
RPSA	0.493156	0.280069	0.0420891	0.137785	0.0469007
RRBP1	0.968846	0.0092939	0.0137064	0.00684544	0.00130825
RTN4	0.973343	0.00195153	0.0139582	0.00708293	0.00366476
RUVBL1	0.229934	0.368297	0.127155	0.19794	0.0766741
RUVBL2	0.471881	0.473689	0.0163981	0.0205412	0.017491
S100A6	0.00318945	0.16614	0.00217297	0.537292	0.291206
SAR1A	0.370632	0.345365	0.086305	0.189317	0.00838011
SEC13	0.642045	0.0175382	0.00380814	0.0829381	0.253671
SEC22B	0.0261351	0.749472	0.000195232	0.213916	0.0102814
SEC23A	0.338751	0.123877	0.217321	0.0612509	0.258801
SEC31A	0.30474	0.0460032	0.152538	0.0573485	0.43937
SEC61A1	0.722211	0.0252454	0.227334	0.0204883	0.00472173
SEC61B	0.586731	0.0735821	0.0521722	0.046053	0.241462
SERBP1	0.594978	0.392758	0.0118964	0.000124485	0.000242725
SERPINB6	0.687025	0.0528302	0.03046	0.145399	0.0842849
SERPINH1	0.969387	0.00211383	0.00790446	0.00991368	0.0106813
SET	0.449451	0.313943	0.0312047	0.0559413	0.14946
SF1	0.0047366	0.0855168	0.0116145	0.366794	0.531338
SF3B2	0.00288039	0.110176	0.339296	0.235961	0.311686
SFPQ	0.865695	0.0838295	0.0479403	0.00166341	0.000871858
SH3BGRL3	0.99885	0.000486687	8.88326e-05	0.000307876	0.000266672
SHMT2	0.9724	0.000258049	0.00690443	0.00682478	0.0136126
SKP1	0.785827	0.00955155	0.0045739	0.124347	0.0757004
SLC16A3	0.760234	0.0833008	0.0184019	0.00446722	0.133596
SLC25A3	0.889846	0.0416354	0.00107565	0.0661945	0.00124814
SLC25A5	0.901984	0.0167129	0.0603971	0.000343232	0.0205628
SMS	0.986515	0.000862203	0.00857246	0.00201137	0.00203847
SND1	0.974022	0.0121874	0.0122583	8.78551e-05	0.00144458
SNRNP70	0.789655	0.0270132	0.0112986	0.127588	0.0444446
SNRPD3	0.505183	0.295355	0.00370845	0.0372634	0.158491
SNRPE	0.148144	0.810852	3.30393e-05	0.000108071	0.0408623
SOD1	0.904212	0.0350757	0.00254591	0.0206377	0.037529
SPTAN1	0.907835	0.0051859	0.0808698	0.0026196	0.00348963
SPTBN1	0.710196	0.224082	0.0564656	0.00717532	0.00208163
SRM	0.950221	0.000747734	0.00824071	0.0168075	0.0239832
SRSF1	0.610359	0.0299849	0.255903	0.0703834	0.0333693
SRSF7	0.252652	0.18979	0.216156	0.0494778	0.291925
SSB	0.808457	0.0461367	3.02186e-07	0.120796	0.02461
SSBP1	0.585899	0.000140042	0.257826	0.128252	0.0278839
SSR4	0.852905	0.0818671	0.0252667	0.0314058	0.00855536
ST13	0.780829	0.0960974	0.083861	0.0276882	0.0115246
STIP1	0.766431	0.0649577	0.162027	0.000675456	0.00590834
STMN1	0.871163	0.0141553	0.0838929	0.0181963	0.0125924
STRAP	0.841354	0.0406625	0.0995799	0.0153177	0.00308585
STT3B	0.562914	0.11982	0.302198	0.0106202	0.00444883
SUB1	0.572612	0.00296324	0.180766	0.243583	7.50642e-05
SUMO2	0.760633	0.11258	0.0743463	0.0140254	0.0384153
SURF4	0.517839	0.374337	0.00184784	0.0937143	0.0122623
SYNCRIP	0.702708	0.137463	0.15101	0.00375126	0.00506829
TAGLN2	0.873353	0.106478	0.0129543	3.20231e-05	0.00718245
TALDO1	0.995442	0.00178411	0.000167547	0.00248374	0.00012218
TARS	0.348645	0.035151	0.408588	1.10407e-05	0.207605
TBCA	0.242777	0.0599434	0.653108	0.0419208	0.00225122
TECR	0.12282	0.187675	0.411982	0.1616	0.115922
TFG	0.110053	0.00643441	0.00974835	0.865805	0.00795928
TKT	0.998825	0.000107003	0.000652955	0.000408324	6.81536e-06
TLN1	0.967074	0.0300957	0.00211672	0.000705396	7.7364e-06
TMEM189.UBE2V1	0.122399	0.266884	0.282506	0.00126279	0.326949
TMEM43	0.146685	0.0284829	0.311559	0.171896	0.341377
TOP1	0.350888	0.138277	0.0264105	0.420191	0.0642347
TPD52L2	0.888139	0.0170617	0.0513107	0.0140808	0.0294078
TPP1	0.865784	0.0902238	0.0123568	0.00275434	0.0288814
TPT1	0.965993	0.00127267	0.000596058	0.0308579	0.00128052
TRIM28	0.97563	0.00171108	0.000828734	9.02497e-05	0.0217397
TSN	0.0438588	0.355772	0.0344	0.560205	0.00576458
TUBA1A	3.2523e-06	0.69519	0.000286091	0.303114	0.00140739
TUBA1B	0.729008	0.010748	0.000195072	0.209083	0.0509663
TUBA1C	0.298767	0.119695	0.384767	0.185495	0.0112759
TUBB	0.929531	0.0616043	0.000263596	0.00725085	0.00135034
TUBB3	0.861637	0.00704719	0.0490318	0.0754223	0.00686168
TUBB4B	0.236521	0.643502	0.0156534	0.0834503	0.0208734
TUBB6	0.80379	0.185218	0.000175274	0.00983696	0.000979652
TUBB8	0.866267	0.109548	2.1647e-05	0.0185065	0.00565702
TUFM	0.972398	0.0125518	3.93042e-05	0.00612259	0.0088886
TWF1	0.462688	0.00717353	0.424418	0.0355848	0.0701358
TXN	0.972493	0.000127498	0.00716693	0.000666425	0.0195461
TXNDC17	0.601112	0.193949	0.0493538	0.0970329	0.0585523
TXNDC5	0.948311	9.70876e-05	0.0160252	0.00455864	0.0310084
TXNRD1	0.99215	0.000656182	0.00080245	0.00629608	9.50536e-05
U2AF2	0.930912	0.0275066	0.0133556	0.000675427	0.0275499
UBA1	0.769984	0.15425	0.00795863	0.058634	0.00917409
UBE2L3	0.904421	0.0127974	0.00684016	0.0107075	0.0652343
UCHL1	0.981856	0.00976821	0.00121855	0.00223768	0.00491938
UGDH	0.986383	0.000424348	8.16637e-06	0.00894353	0.0042411
UGP2	0.983643	0.000235667	0.00650994	0.000657792	0.00895324
UROD	0.0219209	0.0534415	0.771676	0.0273712	0.12559
USP14	0.913884	0.0340338	0.0110221	0.0409382	0.000121576
USP5	0.851781	0.019449	0.0970563	0.00189858	0.0298148
VAPA	0.301532	0.0982729	0.514282	0.00901524	0.076898
VAT1	0.923664	0.0679461	0.00027707	0.00120204	0.00691071
VBP1	0.0697407	0.646505	0.00616836	0.0710525	0.206534
VCL	0.436122	0.0858533	0.434151	0.0335485	0.0103252
VCP	0.700716	0.218484	3.84491e-05	0.077138	0.00362355
VDAC1	0.901865	0.00450151	0.0297784	0.0301305	0.0337242
VDAC2	0.939104	0.00545835	0.0469971	0.00216108	0.00627925
VDAC3	0.000234451	0.320102	0.526101	0.0239448	0.129618
WARS	0.988109	0.00105232	0.00412331	0.00602532	0.000690369
WDR1	0.983845	0.00400283	6.81632e-07	8.46705e-05	0.0120665
XPO1	0.0122973	0.0143024	0.0247446	0.322047	0.626609
XRCC5	0.996475	0.000580513	0.00110535	0.00154499	0.000293695
XRCC6	0.984193	0.000283322	0.0143603	0.000597694	0.00056526
YBX1	0.230991	0.572453	0.0806425	0.0176614	0.0982519
YWHAB	0.242375	0.233553	0.103494	0.269485	0.151092
YWHAE	0.907799	0.00852652	0.0174955	0.0441857	0.021993
YWHAG	0.000270592	0.610081	0.0401605	0.299416	0.0500718
YWHAQ	0.916316	0.00406906	0.00893346	0.0647973	0.00588465
YWHAZ	0.0310731	0.000100614	0.905113	0.0616651	0.00204857
ZYX	0.53204	0.262083	0.170537	0.00890936	0.0264302
AKR1B1	0.874024	0.0112299	0.00577614	0.0760462	0.0329234
ANXA4	0.70237	0.0130696	0.00797391	0.108751	0.167836
ATP5B	0.943858	0.00295601	0.0178409	0.0347559	0.000588794
CALU	0.982981	0.00791679	0.00876355	4.45233e-05	0.000294444
CCT2	0.827733	0.147326	0.00547412	0.0166568	0.00280968
CCT8	0.482325	0.255696	0.00674919	0.133839	0.121391
CKAP4	0.944145	0.0371455	0.0158547	0.00098144	0.00187321
CYB5B	0.91922	0.00689776	0.0336057	0.0367571	0.00351972
EEF1G	0.788825	0.0798185	0.066846	0.00381837	0.0606923
EEF2	0.93224	0.0190418	0.0116665	0.0202547	0.0167973
ENO1	0.980616	0.00433142	0.0145172	0.000132433	0.000403358
GANAB	0.982222	0.000447622	0.00292734	0.00528258	0.00912047
GLUD1	0.265408	0.170177	0.310974	0.00818652	0.245255
HLA.A	0.981344	0.00131486	0.00515336	9.48907e-05	0.012093
HSPA1A	0.988121	0.000319137	0.000540341	0.000933024	0.0100868
HSPA5	0.868225	0.0001496	0.0818188	0.0493483	0.000457858
HSPA8	0.851474	0.0702962	0.0591123	0.000206511	0.0189106
HSPA9	0.227816	0.184784	0.324094	0.200959	0.062348
HSPB1	0.914052	0.0123981	0.0331876	0.0120745	0.0282877
HSPD1	0.905134	0.0172647	0.0290285	0.00715978	0.0414135
IMMT	0.0224752	0.170205	0.776073	0.0308595	0.0003875
KRT1	0.33635	0.222146	0.393654	0.00545461	0.0423946
LMAN2	0.944212	0.00163292	0.0128336	0.0349129	0.00640852
MSN	0.969663	0.0116623	0.0127128	0.00407471	0.00188702
MVP	0.0782685	0.371658	0.119851	0.345972	0.0842509
PARK7	0.220238	0.479422	0.169724	0.0893289	0.0412873
PDCD6IP	0.435148	0.282993	0.0145643	0.00232113	0.264973
PDIA3	0.979576	0.00138084	0.00430739	0.00359597	0.0111395
PGAM1	0.986611	0.00480542	0.00696057	0.000361487	0.00126166
PHB	0.883442	0.0447954	0.00979078	0.0366983	0.0252738
PHGDH	0.990712	0.00758918	0.000708292	0.000923814	6.68993e-05
PRDX1	0.998235	0.000692307	0.00033919	5.33827e-05	0.000680555
PRDX6	0.943302	0.0539716	0.000723914	0.000210862	0.00179131
RAB1B	0.904187	0.0121288	0.0571401	0.0232117	0.00333264
TCP1	0.619876	0.0255984	0.0750513	0.244399	0.0350746
TPI1	0.963083	0.0124601	0.0159032	0.000639257	0.00791418
TPM3	0.693611	0.00607188	0.0592098	0.225204	0.015904
TPM4	0.244531	0.000925707	0.346253	0.285685	0.122606
UQCRC1	0.87648	0.0131745	0.0318465	0.0685088	0.00998979
VIM	0.995543	0.000690822	0.00370962	2.82902e-05	2.78542e-05
